# Supplementary material for: Evidence Mapping and Quality Analysis of Systematic Reviews on Various Aspects Related to Cleft Lip and Palate
Source: MDPI journal article supplement (doi:10.3390/jcm12186002), 2023-09-16
Supplement: s1 [file s1]

**Annexure 5:** Detailed characteristics of the included studies including Domain, Subdomain I and code, Subdomain II and code ( refer to Figure 1 and Table 1 for subdomains and codes), author, reference number (as numbered in the reference list of paper) year, aims and objectives in P (Population) I/E (Intervention/exposure) C (Comparison) O (Outcome), and grade of conclusion. Color codes have been done for different Domains and subdomains (I and II) are as presented in Table 1. Abbreviations: CLP (cleft lip and/ or cleft palate), CL (cleft lip), CP (cleft palate), CLA (Cleft lip alveolus), UCLP (Unilateral cleft lip and palate), BCLP (bilateral cleft lip and palate). Refer to main text of the systematic review using reference number (3<sup>rd</sup> column).

| Domain. A. EPIDEMIOLOGY                    |                                              |               |                  |      |                                                                                                                                                                                                                                                                                                                                                                      |                      |
|--------------------------------------------|----------------------------------------------|---------------|------------------|------|----------------------------------------------------------------------------------------------------------------------------------------------------------------------------------------------------------------------------------------------------------------------------------------------------------------------------------------------------------------------|----------------------|
| Sub-domain I - Incidence and Prevalence A1 |                                              |               |                  |      |                                                                                                                                                                                                                                                                                                                                                                      |                      |
| Nos                                        | Subdomain II and code                        | Author        | Reference number | Year | Aim and objectives in PICO : Population (P), Intervention (I), Comparision (C), Outcome (O)                                                                                                                                                                                                                                                                          | Grade of Conclusion  |
| 1                                          | Anatomical and functional characteristics A6 | Tannure et al | 21               | 2012 | P= Non-syndromic Individuals With CLP,<br>E= CLP<br>C= None<br>O= Prevalence of dental anomalies                                                                                                                                                                                                                                                                     | Partially conclusive |
| 2                                          | Anatomical and functional characteristics A6 | Khalaf et al  | 22               | 2014 | P= Patients with CLP, patients with systematic conditions, patients with a family history and race<br>E= Hypodontia<br>C= None<br>O= Prevalence of hypodontia, excluding third molars, Prevalence of hypodontia by population type, continent, gender, type of malocclusion, number of missing teeth, type of missing teeth, upper and lower jaws, geographic region | Inconclusive         |
| 3                                          | Embryologic development A3                   | Allagh et al  | 23               | 2015 | P= Live births and still birth in community or hospitals;<br>E = Orofacial cleft and neural tube defects<br>C= None.<br>O= Birth prevalence of orofacial clefts and neural tube defects in India                                                                                                                                                                     | Partially conclusive |
| 4                                          | N/A                                          | Wang et al    | 24               | 2017 | P= Oral clefts<br>I= Prevalence<br>C= None<br>O= Prevalence of oral clefts                                                                                                                                                                                                                                                                                           | Conclusive           |
| 5                                          | Etiopathogenesis A2                          | Chen et al    | 25               | 2018 | P=Pregnant women with singleton pregnancies,<br>I=In vitro fertilization/intracytoplasmic sperm injection C=Spontaneously conceived singleton pregnancies<br>O=Birth prevalence of congenital malformations                                                                                                                                                          | Partially conclusive |
| 6                                          | N/A                                          | Haseli et al  | 26               | 2018 | P= Children born in Iran<br>E= CLP<br>C= None<br>O= Prevalence                                                                                                                                                                                                                                                                                                       | Partially conclusive |
| 7                                          | Genetics A4                                  | Pereira et al | 27               | 2019 | P= A ancestry/group of people;<br>I= Genetic testing using ancestry informational markers,<br>C= None<br>O= Outcome: Brazilian ancestry used to construct the research question and search for evidence                                                                                                                                                              | Partially conclusive |
| 8                                          | N/A                                          | Salari et al  | 28               | 2021 | P= CP, CL and CLP<br>I= Global prevalence                                                                                                                                                                                                                                                                                                                            | Conclusive           |

**Annexure 5:** Detailed characteristics of the included studies including Domain, Subdomain I and code, Subdomain II and code ( refer to Figure 1 and Table 1 for subdomains and codes), author, reference number (as numbered in the reference list of paper) year, aims and objectives in P (Population) I/E (Intervention/exposure) C (Comparison) O (Outcome), and grade of conclusion. Color codes have been done for different Domains and subdomains (I and II) are as presented in Table 1. Abbreviations: CLP (cleft lip and/ or cleft palate), CL (cleft lip), CP (cleft palate), CLA (Cleft lip alveolus), UCLP (Unilateral cleft lip and palate), BCLP (bilateral cleft lip and palate). Refer to main text of the systematic review using reference number (3<sup>rd</sup> column).

|                                    |                                   |                     |                         |             |                                                                                                                                                                              |                            |
|------------------------------------|-----------------------------------|---------------------|-------------------------|-------------|------------------------------------------------------------------------------------------------------------------------------------------------------------------------------|----------------------------|
|                                    |                                   |                     |                         |             | C= None<br>O= Global prevalence                                                                                                                                              |                            |
| Sub-domain I - Etiopathogenesis A2 |                                   |                     |                         |             |                                                                                                                                                                              |                            |
| <i>Nos</i>                         | <i>Subdomain II and code</i>      | <i>Author</i>       | <i>Reference number</i> | <i>Year</i> | <i>Aim and objectives in PICO: Population (P), Intervention (I), Comparison (C), Outcome (O)</i>                                                                             | <i>Grade of Conclusion</i> |
| 9                                  | Embryologic development A3        | Chi et al           | 29                      | 2010        | P= Pregnant women,<br>I= Topical corticosteroids during pregnancy<br>C= Control group<br>O= Pregnancy outcomes                                                               | Partially conclusive       |
| 10                                 | Embryologic development A3        | Dreier et al        | 30                      | 2013        | P= Pregnant women<br>E= Fever<br>C= None<br>O= Health Impacts in the Offspring                                                                                               | Partially conclusive       |
| 11                                 | Embryologic development A3        | Molina-Solana et al | 31                      | 2013        | P= Pregnant women who gave birth<br>I= Pregnant women exposed to tobacco, alcohol, fever, folic acid and zinc intake, stress, obesity<br>C= None<br>O= Offspring with CLP    | Partially conclusive       |
| 12                                 | Risk assessment and prediction F2 | Popoff et al        | 32                      | 2013        | P=Relatives of individuals with CLP/ Non-syndromic patients with oral clefts<br>E=Oral cancer<br>C=Family history of cancer/family history of CLP<br>O= Prevalence of cancer | Inconclusive               |
| 13                                 | Embryologic development A3        | Bell et al          | 33                      | 2014        | P= Pregnant women<br>E= Alcohol consumption<br>C= Control group<br>O= Risk of CLP                                                                                            | Partially conclusive       |
| 14                                 | Embryologic development A3        | Luteijn et al       | 34                      | 2014        | P= Women in the First trimester<br>E= Maternal influenza<br>C= Control group<br>O= Risk of congenital anomalies                                                              | Partially conclusive       |
| 15                                 | Genetics A4                       | Sabbagh et al       | 35                      | 2014        | P= Individuals born to consanguineous parents<br>E= Parental consanguinity<br>C= No parental consanguinity<br>O= Non-syndromic orofacial clefts                              | Conclusive                 |
| 16                                 | Embryologic development A3        | De-Regil et al      | 36                      | 2015        | P= All women who become pregnant or were 12 or fewer weeks' pregnant at the time of the intervention<br>I=Supplementation with folate<br>C= None<br>O= Birth defects         | Conclusive                 |

**Annexure 5:** Detailed characteristics of the included studies including Domain, Subdomain I and code, Subdomain II and code ( refer to Figure 1 and Table 1 for subdomains and codes), author, reference number (as numbered in the reference list of paper) year, aims and objectives in P (Population) I/E (Intervention/exposure) C (Comparison) O (Outcome), and grade of conclusion. Color codes have been done for different Domains and subdomains (I and II) are as presented in Table 1. Abbreviations: CLP (cleft lip and/ or cleft palate), CL (cleft lip), CP (cleft palate), CLA (Cleft lip alveolus), UCLP (Unilateral cleft lip and palate), BCLP (bilateral cleft lip and palate). Refer to main text of the systematic review using reference number (3<sup>rd</sup> column).

|    |                            |                   |    |      |                                                                                                                                                                                                                                                                                                         |                      |
|----|----------------------------|-------------------|----|------|---------------------------------------------------------------------------------------------------------------------------------------------------------------------------------------------------------------------------------------------------------------------------------------------------------|----------------------|
| 17 | Embryologic development A3 | Izedonmwene et al | 37 | 2015 | P= Pre-Maternal Obese/Overweight Women<br>I= WHO recommended BMI<br>C= Pre-Maternal Normal Weight Women<br>O= Risk of Having Offspring with CLP                                                                                                                                                         | Conclusive           |
| 18 | Embryologic development A3 | Sabbagh et al     | 38 | 2015 | P= Pregnant women<br>E= Passive smoking<br>C= Association with active smoking<br>O= CLP in infants                                                                                                                                                                                                      | Conclusive           |
| 19 | Embryologic development A3 | Tanoshima et al   | 39 | 2015 | P= Pregnant women with epilepsy<br>E= Valproic Acid<br>C= Other AED<br>O= Risks of Congenital Malformations                                                                                                                                                                                             | Conclusive           |
| 20 | Embryologic development A3 | Rao et al         | 40 | 2016 | P= Pregnant women<br>E= Air Pollution<br>C= None<br>O= Risk of Orofacial Clefts in Infants                                                                                                                                                                                                              | Partially conclusive |
| 21 | Embryologic development A3 | Veroniki et al    | 41 | 2017 | P= Pregnant women<br>I= AEDs of as monotherapy or polytherapy of any dose<br>C= Placebo, no AED treatment or other AEDs alone or in combination<br>O=Incidence of major CMs, overall and by specific type (cardiac malformations, hypospadias, CLP, club foot, inguinal hernia, and undescended testes) | Conclusive           |
| 22 | Embryologic development A3 | Liang et al       | 42 | 2018 | P= Singleton pregnancies<br>I= In vitro fertilization/intracytoplasmic sperm injection<br>C= Normal controls<br>O= Congenital malformations                                                                                                                                                             | Conclusive           |
| 23 | Embryologic development A3 | Jayarajan et al   | 43 | 2019 | P= Females of reproductive age group,<br>I= High-dose folic acid<br>C= No supplementation or low-dose folic acid supplementation,<br>O= Occurrence or recurrence of CL ±CP or isolated CP.                                                                                                              | Partially conclusive |
| 24 | Embryologic development A3 | Yin et al         | 44 | 2019 | P= Pregnant women<br>E= Alcohol consumption<br>C= Control group (women without alcohol consumption)<br>O= CLP                                                                                                                                                                                           | Partially conclusive |
| 25 | Embryologic development A3 | Picot et al       | 45 | 2020 | P= First trimester of pregnancy, and the risk of MCM, cardiac defects and orofacial clefts<br>I= ondansetron<br>C= None<br>O= malformations                                                                                                                                                             | Partially conclusive |
| 26 | Embryologic development A3 | Fell et al        | 46 | 2021 | P= Pregnant women or women who have given birth to live-born children in the general population,                                                                                                                                                                                                        | Partially conclusive |

**Annexure 5:** Detailed characteristics of the included studies including Domain, Subdomain I and code, Subdomain II and code ( refer to Figure 1 and Table 1 for subdomains and codes), author, reference number (as numbered in the reference list of paper) year, aims and objectives in P (Population) I/E (Intervention/exposure) C (Comparison) O (Outcome), and grade of conclusion. Color codes have been done for different Domains and subdomains (I and II) are as presented in Table 1. Abbreviations: CLP (cleft lip and/ or cleft palate), CL (cleft lip), CP (cleft palate), CLA (Cleft lip alveolus), UCLP (Unilateral cleft lip and palate), BCLP (bilateral cleft lip and palate). Refer to main text of the systematic review using reference number (3<sup>rd</sup> column).

|                            |                                                                               |               |                         |             |                                                                                                                                                                                                                                                                                                                                                             |                            |
|----------------------------|-------------------------------------------------------------------------------|---------------|-------------------------|-------------|-------------------------------------------------------------------------------------------------------------------------------------------------------------------------------------------------------------------------------------------------------------------------------------------------------------------------------------------------------------|----------------------------|
|                            |                                                                               |               |                         |             | E= Active cigarette smoking in women during pregnancy measured either by self-reporting or by proxy measurements<br>C= None<br>O= children born with an orofacial cleft.                                                                                                                                                                                    |                            |
| 27                         | Health economics E4                                                           | Kruppa et al  | 47                      | 2021        | P= Patients with CL/P, I= lower-middle income, low-middle-income, or low income country,<br>I= None<br>C= Patients in high-income countries<br>O= Biological risks or environmental risks                                                                                                                                                                   | Conclusive                 |
| 28                         | Embryologic development A3                                                    | Shi et al     | 48                      | 2021        | P= Pregnant women<br>E= Common cold, fever<br>C= None<br>O= risk of oral clefts in the offspring                                                                                                                                                                                                                                                            | Partially conclusive       |
| 29                         | Psychosocial aspects, perceptions and quality of life of patients with CLP E1 | Tran et al    | 49                      | 2022        | P= Women in preconception period<br>E= Stressful life events<br>C= No stressful life event in preconception period<br>O= Baby with CLP                                                                                                                                                                                                                      | Partially conclusive       |
| Sub-domain I - Genetics A4 |                                                                               |               |                         |             |                                                                                                                                                                                                                                                                                                                                                             |                            |
| <i>Nos</i>                 | <i>Subdomain II and code</i>                                                  | <i>Author</i> | <i>Reference number</i> | <i>Year</i> | <i>Aim and objectives in PICO: Population (P), Intervention (I), Comparison (C), Outcome (O)</i>                                                                                                                                                                                                                                                            | <i>Grade of Conclusion</i> |
| 30                         | Risk assessment and prediction F2                                             | Machado et al | 50                      | 2018        | P= Patients with NOC in the Brazilian population,<br>I= Analysis of genetic markers,<br>C= Inclusion of unaffected individuals (unrelated subjects for case-control studies and family members for family-based studies),<br>O= Frequency and potential association of genetic markers, S: observational studies (case-control or family-based approaches). | Conclusive                 |
| 31                         | Etiopathogenesis A2                                                           | Imani et al   | 51                      | 2019        | P= NSCL/P<br>E= rs3758249 and rs4460498 FOXE1 polymorphisms<br>C= Control group without polymorphism of rs3758249 and rs4460498 FOXE1<br>O= Association with NSCL/P                                                                                                                                                                                         | Conclusive                 |
| 32                         | Etiopathogenesis A2                                                           | Imani et al   | 52                      | 2019        | P=NSCL/P patients with no other systematic disease<br>I= rs13041247 and rs11696257 v-maf musculoaponeurotic fibrosarcoma oncogene homolog B (MAFB) polymorphisms<br>C= Control group<br>O= Association between polymorphism and NSCLP                                                                                                                       | Conclusive                 |
| 33                         | Etiopathogenesis A2                                                           | Imani et al   | 53                      | 2019        | P= Non-syndromic CLP<br>E= BHMT rs3797546 and/or rs3733890 polymorphisms<br>C= Healthy controls                                                                                                                                                                                                                                                             | Partially conclusive       |

**Annexure 5:** Detailed characteristics of the included studies including Domain, Subdomain I and code, Subdomain II and code ( refer to Figure 1 and Table 1 for subdomains and codes), author, reference number (as numbered in the reference list of paper) year, aims and objectives in P (Population) I/E (Intervention/exposure) C (Comparison) O (Outcome), and grade of conclusion. Color codes have been done for different Domains and subdomains (I and II) are as presented in Table 1. Abbreviations: CLP (cleft lip and/ or cleft palate), CL (cleft lip), CP (cleft palate), CLA (Cleft lip alveolus), UCLP (Unilateral cleft lip and palate), BCLP (bilateral cleft lip and palate). Refer to main text of the systematic review using reference number (3<sup>rd</sup> column).

|                                                             |                                                              |                   |                  |      |                                                                                                                                                                                                                                                                      |                      |
|-------------------------------------------------------------|--------------------------------------------------------------|-------------------|------------------|------|----------------------------------------------------------------------------------------------------------------------------------------------------------------------------------------------------------------------------------------------------------------------|----------------------|
|                                                             |                                                              |                   |                  |      | O= Risk of NSCL/P                                                                                                                                                                                                                                                    |                      |
| 34                                                          | Risk assessment and prediction F2                            | Mendes et al      | 54               | 2019 | P= CLP<br>I= Biological material (plasma)<br>C= Healthy individuals<br>O= Association of miRNAs to non-syndromic orofacial clefts                                                                                                                                    | Partially conclusive |
| 35                                                          | Etiopathogenesis A2                                          | Imani et al       | 55               | 2021 | P= Non-syndromic CLP<br>E= ABCA4 polymorphisms (rs560426 and rs481931)<br>C= Healthy controls<br>O= Risk of NSCLP                                                                                                                                                    | Conclusive           |
| Sub-domain I - Anatomical and functional characteristics A6 |                                                              |                   |                  |      |                                                                                                                                                                                                                                                                      |                      |
| Nos .                                                       | Subdomain II and code                                        | Author            | Reference number | Year | Aim and objectives in PICO : Population (P), Intervention (I), Comparison (C), Outcome (O)                                                                                                                                                                           | Grade of Conclusion  |
| 36                                                          | N/A                                                          | Antonarakis et al | 56               | 2013 | P= Non-syndromic UCLP patients with permanent dentition<br>I= Assessment of mesiodistal tooth dimensions on the cleft side<br>C= Mesiodistal tooth dimensions on the non-cleft side, control group<br>O= Mesiodistal tooth dimensions in non-syndromic UCLP patients | Conclusive           |
| 37                                                          | Advanced radiography including 3D imaging and 3D printing B6 | Berrocal et al    | 57               | 2014 | P= Individuals with CLP<br>I= Computed tomography scans or lateral cephalometric radiographs<br>C= Individuals without CLP<br>O= Cervical vertebrae anomalies                                                                                                        | Conclusive           |
| 38                                                          | Advanced radiography including 3D imaging and 3D printing B6 | Kuijpers et al    | 58               | 2014 | P= Patients with Orofacial Clefts,<br>I= Three-dimensional Imaging Methods,<br>C= None<br>O= Quantitative Analysis of Facial Soft Tissues and Skeletal Morphology                                                                                                    | Partially conclusive |
| 39                                                          | N/A                                                          | Boyce et al       | 59               | 2017 | P= Individuals with non-syndromic submucous CLP<br>I= Methods to assess speech and language characteristics<br>C= None<br>O= Speech and language characteristics                                                                                                     | Partially conclusive |
| 40                                                          | N/A                                                          | Van Dyck et al    | 60               | 2019 | P= Patients with CLP<br>I= Dental age estimation, determination of dental development and/or tooth eruption<br>C= Patients without CLP<br>O= Difference in dental age, dental development and/or tooth eruption.                                                     | Conclusive           |
| 41                                                          | N/A                                                          | Gallego et al     | 61               | 2021 | P= Children between 2 & 10 years of age, both sexes<br>E= CLP<br>C= None<br>O= Growth, body weight, height, length, body mass index, and body composition                                                                                                            | Inconclusive         |

**Annexure 5:** Detailed characteristics of the included studies including Domain, Subdomain I and code, Subdomain II and code ( refer to Figure 1 and Table 1 for subdomains and codes), author, reference number (as numbered in the reference list of paper) year, aims and objectives in P (Population) I/E (Intervention/exposure) C (Comparison) O (Outcome), and grade of conclusion. Color codes have been done for different Domains and subdomains (I and II) are as presented in Table 1. Abbreviations: CLP (cleft lip and/ or cleft palate), CL (cleft lip), CP (cleft palate), CLA (Cleft lip alveolus), UCLP (Unilateral cleft lip and palate), BCLP (bilateral cleft lip and palate). Refer to main text of the systematic review using reference number (3<sup>rd</sup> column).

|                                         |                                                              |                      |                         |             |                                                                                                                                                                                                                                                                                                                                                                                                                                                                                                                              |                            |
|-----------------------------------------|--------------------------------------------------------------|----------------------|-------------------------|-------------|------------------------------------------------------------------------------------------------------------------------------------------------------------------------------------------------------------------------------------------------------------------------------------------------------------------------------------------------------------------------------------------------------------------------------------------------------------------------------------------------------------------------------|----------------------------|
| 42                                      | Etiopathogenesis A2                                          | Marzouk et al        | 62                      | 2021        | P= Individuals with non-syndromic orofacial clefts<br>E= Dental anomalies<br>C= Individuals without Oral clefts<br>O= Frequency of dental anomalies (DAs)                                                                                                                                                                                                                                                                                                                                                                    | Conclusive                 |
| 43                                      | Conventional radiography and 2D imaging B5                   | Murugan and Kailasam | 63                      | 2021        | P= Patients with non-syndromic UCLP and BCLP<br>I= Lateral cephalograms or lateral cephalograms derived from CBCTs, wherein the CBA (N-S-Ba) was measured<br>C= None<br>O= Cranial base angle (N-S-Ba) of patients with CLP and non CLP                                                                                                                                                                                                                                                                                      | Conclusive                 |
| 44                                      | N/A                                                          | Southby et al        | 64                      | 2021        | P= Children born with CP aged up to 18 years<br>E= Speech input processing skills<br>C= Speech input processing skills of typically developing controls or a comparison group from another clinical population<br>O= Speech input processing skills of children born with CLP, CP                                                                                                                                                                                                                                            | Inconclusive               |
| 45                                      | N/A                                                          | Wu et al             | 65                      | 2021        | P= Patients of any sex and ethnicity with CLP.<br>I= Evaluation of skeletal maturity.<br>C= NCLP children.<br>O= Difference in skeletal maturation between patients with CL/P and NCLP children.                                                                                                                                                                                                                                                                                                                             | Inconclusive               |
| 46                                      | Advanced radiography including 3D imaging and 3D printing B6 | Srivastav et al      | 66                      | 2022        | P= Individuals of any age group or gender with CLP, whose assessment of maxillary sinus characteristics has been done by using cone beam computed tomography<br>I= Cone Beam Computed Tomographic assessment of the linear and volumetric characteristics of the maxillary sinus<br>C= Individuals without CLP or the non-affected side of the patients with unilateral CLP<br>O= Anatomic hard and soft tissue variations, 2. Linear measurements of the maxillary sinus, 3. Volumetric measurements of the maxillary sinus | Partially conclusive       |
| <b>Domain. B. DIAGNOSTIC</b>            |                                                              |                      |                         |             |                                                                                                                                                                                                                                                                                                                                                                                                                                                                                                                              |                            |
| <b>Sub-domain I - Indices of CLP B2</b> |                                                              |                      |                         |             |                                                                                                                                                                                                                                                                                                                                                                                                                                                                                                                              |                            |
| <i>Nos</i>                              | <i>Subdomain II and code</i>                                 | <i>Author</i>        | <i>Reference number</i> | <i>Year</i> | <i>Aim and objectives in PICO: Population (P), Intervention (I), Comparison (C), Outcome (O)</i>                                                                                                                                                                                                                                                                                                                                                                                                                             | <i>Grade of Conclusion</i> |
| 47                                      | Outcome assessment C15                                       | Altalibi et al       | 67                      | 2013        | P= CLP patients<br>I= various indices of CLP assessment<br>C= gradation of dental models of CLP patients<br>O= reliability and validity of index                                                                                                                                                                                                                                                                                                                                                                             | Conclusive                 |
| 48                                      | Treatment planning and prediction C1                         | Buj-Acosta et al     | 68                      | 2017        | P= patients born with unilateral CLP<br>I= Study models (pre-treatment) and GOSLON rating<br>C= Study models (post-treatment) and GOSLON rating                                                                                                                                                                                                                                                                                                                                                                              | Inconclusive               |

**Annexure 5:** Detailed characteristics of the included studies including Domain, Subdomain I and code, Subdomain II and code ( refer to Figure 1 and Table 1 for subdomains and codes), author, reference number (as numbered in the reference list of paper) year, aims and objectives in P (Population) I/E (Intervention/exposure) C (Comparison) O (Outcome), and grade of conclusion. Color codes have been done for different Domains and subdomains (I and II) are as presented in Table 1. Abbreviations: CLP (cleft lip and/ or cleft palate), CL (cleft lip), CP (cleft palate), CLA (Cleft lip alveolus), UCLP (Unilateral cleft lip and palate), BCLP (bilateral cleft lip and palate). Refer to main text of the systematic review using reference number (3<sup>rd</sup> column).

|                                                                              |                                                       |                   |                     |      |                                                                                                                                                                                                                                                                                          |                      |
|------------------------------------------------------------------------------|-------------------------------------------------------|-------------------|---------------------|------|------------------------------------------------------------------------------------------------------------------------------------------------------------------------------------------------------------------------------------------------------------------------------------------|----------------------|
|                                                                              |                                                       |                   |                     |      | O= Predictive validity of the GOSLON Yardstick index                                                                                                                                                                                                                                     |                      |
| Sub-domain I - Prenatal diagnosis B3                                         |                                                       |                   |                     |      |                                                                                                                                                                                                                                                                                          |                      |
| Nos<br>.                                                                     | Subdomain II and code                                 | Author            | Reference<br>number | Year | Aim and objectives in PICO: Population (P), Intervention (I), Comparison (C), Outcome (O)                                                                                                                                                                                                | Grade of Conclusion  |
| 49                                                                           | Conventional radiography and 2D imaging B5            | Lai et al         | 69                  | 2021 | P= second and third trimester (12–36 weeks) of pregnancy<br>I= prenatal fetal ultrasound<br>C= None<br>O= prenatal detection of CLP (diagnostic accuracy)                                                                                                                                | Conclusive           |
| Sub-domain I - Advanced radiography including 3D imaging and 3D printing B6  |                                                       |                   |                     |      |                                                                                                                                                                                                                                                                                          |                      |
| Nos<br>.                                                                     | Subdomain II and code                                 | Author            | Reference<br>number | Year | Aim and objectives in PICO: Population (P), Intervention (I), Comparison (C), Outcome (O)                                                                                                                                                                                                | Grade of Conclusion  |
| 50                                                                           | Clinical practice guidelines and Core outcome sets G1 | van Vlijmen et al | 70                  | 2012 | P= Orthodontic patients<br>I= CBCT<br>C= None<br>O= Applications of CBCT in orthodontics                                                                                                                                                                                                 | Partially conclusive |
| 51                                                                           | Anatomical and functional characteristics A6          | Thierens et al    | 71                  | 2018 | P= CLP patients before intervention<br>I= 3D imaging<br>C= CLP patients after orthopedic or surgical intervention<br>O= soft tissue changes                                                                                                                                              | Partially conclusive |
| 52                                                                           | Anatomical and functional characteristics A6          | Thierens et al    | 72                  | 2018 | P= Patients with repaired or unrepaired CLP<br>I= non-ionizing 3D images acquired with 3D surface scanning or 3D digital stereophotogrammetry<br>C= None<br>O= quantification of facial morphology, symmetry, and appearance                                                             | Conclusive           |
| Domain. C. THERAPEUTIC                                                       |                                                       |                   |                     |      |                                                                                                                                                                                                                                                                                          |                      |
| Sub-domain I - Feeding and nutrition in patients C2                          |                                                       |                   |                     |      |                                                                                                                                                                                                                                                                                          |                      |
| Nos<br>.                                                                     | Subdomain II and code                                 | Author            | Reference<br>number | Year | Aim and objectives in PICO: Population (P), Intervention (I), Comparison (C), Outcome (O)                                                                                                                                                                                                | Grade of Conclusion  |
| 53                                                                           | Clinical practice guidelines and Core outcome sets G1 | Mei et al         | 73                  | 2009 | P= breastfed infants (0 to 6 months) with CL/P<br>I= breastfeeding<br>C= None<br>O= outcome measures of interest—suction and intra-oral pressure, attachment to breast, growth (weight and length), supplemental feeding, feeding duration, and mother satisfaction with advice received | Conclusive           |
| Sub-domain I - Presurgical Infant Orthopaedics and Naso-Alveolar Moulding C3 |                                                       |                   |                     |      |                                                                                                                                                                                                                                                                                          |                      |
| Nos<br>.                                                                     | Subdomain II and code                                 | Author            | Reference<br>number | Year | Aim and objectives in PICO: Population (P), Intervention (I), Comparison (C), Outcome (O)                                                                                                                                                                                                | Grade of Conclusion  |

**Annexure 5:** Detailed characteristics of the included studies including Domain, Subdomain I and code, Subdomain II and code ( refer to Figure 1 and Table 1 for subdomains and codes), author, reference number (as numbered in the reference list of paper) year, aims and objectives in P (Population) I/E (Intervention/exposure) C (Comparison) O (Outcome), and grade of conclusion. Color codes have been done for different Domains and subdomains (I and II) are as presented in Table 1. Abbreviations: CLP (cleft lip and/ or cleft palate), CL (cleft lip), CP (cleft palate), CLA (Cleft lip alveolus), UCLP (Unilateral cleft lip and palate), BCLP (bilateral cleft lip and palate). Refer to main text of the systematic review using reference number (3<sup>rd</sup> column).

|                                                                                             |                                                              |                |                  |      |                                                                                                                                                                                                                                                                                                                                                                                                                      |                      |
|---------------------------------------------------------------------------------------------|--------------------------------------------------------------|----------------|------------------|------|----------------------------------------------------------------------------------------------------------------------------------------------------------------------------------------------------------------------------------------------------------------------------------------------------------------------------------------------------------------------------------------------------------------------|----------------------|
| 54                                                                                          | Cleft Lip repair C8                                          | Heijden et al  | 74               | 2012 | P= non-syndromic unilateral CL, jaw, and palate<br>I= naso-alveolar molding plus lip repair<br>C= control group with Lip repair only<br>O= nasal symmetry after PSIO                                                                                                                                                                                                                                                 | Inconclusive         |
| 55                                                                                          | Outcome assessment C15                                       | Namdar et al   | 75               | 2020 | P= CLP patients<br>I= Nasoalveolar Molding<br>C= control group<br>O= Positive outcomes with PNAM                                                                                                                                                                                                                                                                                                                     | Partially conclusive |
| 56                                                                                          | Outcome assessment C15                                       | Padovano et al | 76               | 2021 | P= children with UCLP<br>I= NAM<br>C= non-NAM passive PSIO and/or to no appliance-based presurgical treatment<br>O= effects on nasolabial aesthetic outcomes, craniofacial form, and dental arch development after NAM                                                                                                                                                                                               | Partially conclusive |
| Sub-domain I - Orthodontic and Surgical Perspectives of Secondary Alveolar Bone Grafting C5 |                                                              |                |                  |      |                                                                                                                                                                                                                                                                                                                                                                                                                      |                      |
| Nos                                                                                         | Subdomain II and code                                        | Author         | Reference number | Year | Aim and objectives in PICO: Population (P), Intervention (I), Comparison (C), Outcome (O)                                                                                                                                                                                                                                                                                                                            | Grade of Conclusion  |
| 57                                                                                          | Advanced radiography including 3D imaging and 3D printing B6 | Mulder et al   | 77               | 2019 | P= CLP patients<br>I= SABG, 3D radiological evaluation<br>C= Nonne<br>O= types of 3D imaging and success and resorption rates after SABG                                                                                                                                                                                                                                                                             | Inconclusive         |
| 58                                                                                          | Advanced radiography including 3D imaging and 3D printing B6 | Scalzone et al | 78               | 2019 | P= unilateral CLP older than 5 years of age<br>I= radiographic evaluation (CT and/or CBCT) of the cleft area<br>C= traditional iliac crest graft with secondary bone graft using alloplastic material<br>O= radiographic assessment of bone graft volume through the 3D images and the radiographic assessment in the grafted area of alveolar bone height, Length of hospital stay                                  | Conclusive           |
| 59                                                                                          | Alveolar bone grafting and graft materials C10               | Pinheiro et al | 79               | 2020 | P= Subjects with cleft from all ethnical backgrounds with either unilateral or bilateral clefts<br>I= Early and/or conventional secondary alveolar bone grafts using autogenous illiac bone<br>C= Autogenous conventional secondary alveolar bone graft,<br>O= Success rate, bone height, bone volume, tooth eruption, and periodontal status of cleft-adjacent teeth; minimum follow-up time of 6 months in average | Inconclusive         |
| 60                                                                                          | Outcome assessment C15                                       | Yu et al       | 80               | 2020 | P= Patients with unilateral or bilateral non-syndromic CLA or non-syndromic CLP<br>I= secondary alveolar bone grafting, 2D and 3D radiographs<br>C= None<br>O= postoperative change in the cleft defect                                                                                                                                                                                                              | Partially conclusive |



**Annexure 5:** Detailed characteristics of the included studies including Domain, Subdomain I and code, Subdomain II and code ( refer to Figure 1 and Table 1 for subdomains and codes), author, reference number (as numbered in the reference list of paper) year, aims and objectives in P (Population) I/E (Intervention/exposure) C (Comparison) O (Outcome), and grade of conclusion. Color codes have been done for different Domains and subdomains (I and II) are as presented in Table 1. Abbreviations: CLP (cleft lip and/ or cleft palate), CL (cleft lip), CP (cleft palate), CLA (Cleft lip alveolus), UCLP (Unilateral cleft lip and palate), BCLP (bilateral cleft lip and palate). Refer to main text of the systematic review using reference number (3<sup>rd</sup> column).

|                                                                                                 |                                                |                      |                  |      |                                                                                                                                                                                                                                                                                                                                                                                                                               |                      |
|-------------------------------------------------------------------------------------------------|------------------------------------------------|----------------------|------------------|------|-------------------------------------------------------------------------------------------------------------------------------------------------------------------------------------------------------------------------------------------------------------------------------------------------------------------------------------------------------------------------------------------------------------------------------|----------------------|
| 61                                                                                              | Alveolar bone grafting and graft materials C10 | Jahanbin et al       | 81               | 2021 | P= Patients with unilateral or bilateral CLP<br>I= secondary alveolar bone grafting<br>C= patients before or without graft and other methods were performed for grafting<br>O= long term success of the alveolar bone graft.                                                                                                                                                                                                  | Partially Conclusive |
| 62                                                                                              | Outcome assessment C15                         | Lacerda-Santos et al | 82               | 2021 | P= Patients with CLP, and mean age between 7 and 14 years<br>I= Secondary alveolar graft surgery in the cleft region<br>C= Not submitted to surgery<br>O= Increased rate of canine eruption, Successful bone graft. Canine impacted due to agenesis of the lateral incisor. Effect of orthodontic treatment before and after bone graft surgery                                                                               | Inconclusive         |
| Sub-domain I - Conventional orthodontics C6                                                     |                                                |                      |                  |      |                                                                                                                                                                                                                                                                                                                                                                                                                               |                      |
| Nos .                                                                                           | Subdomain II and code                          | Author               | Reference number | Year | Aim and objectives in PICO: Population (P), Intervention (I), Comparison (C), Outcome (O)                                                                                                                                                                                                                                                                                                                                     | Grade of Conclusion  |
| 63                                                                                              | Outcome assessment C15                         | Palikaraki et al     | 83               | 2020 | P= Individuals of any age, gender, and ethnicity with UCLP<br>I= Studies with at least one group of UCLP patients treated with a conventional facemask with or without expansion<br>C= It should be a human clinical trial that had a comparable untreated control group of patients with or without UCLP<br>O= Angular and linear cephalometric measurements evaluated by cephalometric analysis before and after treatment. | Partially conclusive |
| 64                                                                                              | Outcome assessment C15                         | Shafae et al         | 84               | 2020 | P= CLP patients<br>I = Face mask therapy, 2D and 3D evaluation<br>C= non-cleft patients<br>O= dimensions of the airway space and relevant landmarks in cephalometric and 3D images after Face mask therapy                                                                                                                                                                                                                    | Conclusive           |
| Sub-domain I - Cleft Lip repair C8                                                              |                                                |                      |                  |      |                                                                                                                                                                                                                                                                                                                                                                                                                               |                      |
| Nos .                                                                                           | Subdomain II and code                          | Author               | Reference number | Year | Aim and objectives in PICO: Population (P), Intervention (I), Comparison (C), Outcome (O)                                                                                                                                                                                                                                                                                                                                     | Grade of Conclusion  |
| 65                                                                                              | Effects/Complications of PSIO and PNAM D2      | Thierens et al       | 85               | 2016 | P= CLP<br>I= Labial adhesion<br>C= None<br>O= Effect on maxillary arch dimensions and nasolabial esthetics                                                                                                                                                                                                                                                                                                                    | Inconclusive         |
| 66                                                                                              | Outcome assessment C15                         | Jayarajan et al      | 86               | 2018 | P= Patients with non-syndromic unilateral CL undergoing rhinoplasty along with primary CL repair<br>I= Use of open rhinoplasty<br>C= Use of closed rhinoplasty technique<br>O= Definitive anatomical measurements of the nose parameters during follow-up after CL repair                                                                                                                                                     | Inconclusive         |
| Sub-domain I - Cleft alveolus, sub-mucous cleft and all types of cleft palate closure/repair C9 |                                                |                      |                  |      |                                                                                                                                                                                                                                                                                                                                                                                                                               |                      |
| Nos .                                                                                           | Subdomain II and code                          | Author               | Reference number | Year | Aim and objectives in PICO: Population (P), Intervention (I), Comparison (C), Outcome (O)                                                                                                                                                                                                                                                                                                                                     | Grade of Conclusion  |

**Annexure 5:** Detailed characteristics of the included studies including Domain, Subdomain I and code, Subdomain II and code ( refer to Figure 1 and Table 1 for subdomains and codes), author, reference number (as numbered in the reference list of paper) year, aims and objectives in P (Population) I/E (Intervention/exposure) C (Comparison) O (Outcome), and grade of conclusion. Color codes have been done for different Domains and subdomains (I and II) are as presented in Table 1. Abbreviations: CLP (cleft lip and/ or cleft palate), CL (cleft lip), CP (cleft palate), CLA (Cleft lip alveolus), UCLP (Unilateral cleft lip and palate), BCLP (bilateral cleft lip and palate). Refer to main text of the systematic review using reference number (3<sup>rd</sup> column).

|                                                               |                                                                              |                |                  |      |                                                                                                                                                                                                                                                                                                                                            |                      |
|---------------------------------------------------------------|------------------------------------------------------------------------------|----------------|------------------|------|--------------------------------------------------------------------------------------------------------------------------------------------------------------------------------------------------------------------------------------------------------------------------------------------------------------------------------------------|----------------------|
| 67                                                            | Effects/Complications of Surgical treatment and/or alveolar bone grafting D4 | Salgado et al  | 87               | 2019 | P= Unilateral complete CLP<br>I= Early palatoplasty, with hard palate surgery carried out before 18 months<br>C= children subjected to late palatoplasty, with hard palate surgery carried out after 18 months<br>O= assessing through cephalometric radiographs in lateral norm, the differences in the maxillary growth among the groups | Inconclusive         |
| Sub-domain I - Alveolar bone grafting and graft materials C10 |                                                                              |                |                  |      |                                                                                                                                                                                                                                                                                                                                            |                      |
| Nos .                                                         | Subdomain II and code                                                        | Author         | Reference number | Year | Aim and objectives in PICO: Population (P), Intervention (I), Comparison (C), Outcome (O)                                                                                                                                                                                                                                                  | Grade of Conclusion  |
| 68                                                            | Orthodontic and Surgical Perspectives of Secondary Alveolar Bone Grafting C5 | Guo et al      | 88               | 2011 | P= Participants have CLP<br>I= Secondary alveolar bone grafting<br>C= Variations in timing, donor sites, bone substitutes and technique<br>O= Bone graft healing (Clinical and radiographic assessment)                                                                                                                                    | Inconclusive         |
| 69                                                            | Orthodontic and Surgical Perspectives of Secondary Alveolar Bone Grafting C5 | Canellas et al | 89               | 2018 | P= Patients requiring various oral surgical procedures<br>I= Use of autologous PRF combined or not with another biomaterial<br>C= Comparator or control group: no treatment or another biomaterial combination without PRF<br>O= Success of the procedure, S= studies in humans, including only randomized control trials                  | Partially conclusive |
| 70                                                            | Orthodontic and Surgical Perspectives of Secondary Alveolar Bone Grafting C5 | da Rosa et al  | 90               | 2018 | P= Patients with CLP defects<br>I= Use of rhBMP-2 in biomaterials for bone graft<br>C= Use of iliac crest bone graft (ICBG)<br>O= Bone formation volume and bone filling percentage                                                                                                                                                        | Conclusive           |
| 71                                                            | Advanced radiography including 3D imaging and 3D printing B6                 | Kamal et al    | 91               | 2018 | P= Patients with congenital CLP with alveolar cleft defect<br>I= Grafting surgical interventions (autogenous or tissue-engineered bone substitutes), volumetric imaging<br>C= None<br>O= Effectiveness (filling the alveolar cleft defect)                                                                                                 | Conclusive           |
| 72                                                            | Effects/Complications of Surgical treatment and/or alveolar bone grafting D4 | Simpson et al  | 92               | 2018 | P= Patients undergoing primary cleft palate or oronasal fistula repair<br>I= Use of ADM during surgical repair<br>C= None<br>O= Postoperative fistula rate                                                                                                                                                                                 | Inconclusive         |
| 73                                                            | Comprehensive Interdisciplinary care C13                                     | Sales et al    | 93               | 2019 | P= Cleft Patients<br>I= Dental implants placed in bone graft area<br>C= None<br>O= Effectiveness                                                                                                                                                                                                                                           | Partially conclusive |

**Annexure 5:** Detailed characteristics of the included studies including Domain, Subdomain I and code, Subdomain II and code ( refer to Figure 1 and Table 1 for subdomains and codes), author, reference number (as numbered in the reference list of paper) year, aims and objectives in P (Population) I/E (Intervention/exposure) C (Comparison) O (Outcome), and grade of conclusion. Color codes have been done for different Domains and subdomains (I and II) are as presented in Table 1. Abbreviations: CLP (cleft lip and/ or cleft palate), CL (cleft lip), CP (cleft palate), CLA (Cleft lip alveolus), UCLP (Unilateral cleft lip and palate), BCLP (bilateral cleft lip and palate). Refer to main text of the systematic review using reference number (3<sup>rd</sup> column).

|    |                                                                                 |                      |     |      |                                                                                                                                                                                                                                                                                                                                              |                      |
|----|---------------------------------------------------------------------------------|----------------------|-----|------|----------------------------------------------------------------------------------------------------------------------------------------------------------------------------------------------------------------------------------------------------------------------------------------------------------------------------------------------|----------------------|
| 74 | Cleft alveolus, submucous cleft and all types of cleft palate closure/repair C9 | Uribe et al          | 94  | 2019 | P= Patients with CLA<br>I= Reconstruction of the alveolar cleft with rhBMP-2.<br>C= Iliac crest bone graft<br>O= Average bone volume formation and average bone height formation in the alveolar cleft. Mean difference was calculated and pooled by meta-analysis.                                                                          | Partially conclusive |
| 75 | Orthodontic and Surgical Perspectives of Secondary Alveolar Bone Grafting C5    | Francisco et al      | 95  | 2020 | P= Orthodontic patients of any gender or age<br>I= PRF with/without a combined biomaterial<br>C= The control group- participants that underwent treatments approaches without PRF<br>O= Hard tissue reconstruction of alveolar bone,rate of tooth movement                                                                                   | Partially conclusive |
| 76 | Presurgical Infant Orthopaedics and Naso-Alveolar Moulding C3                   | Ma et al             | 96  | 2020 | P= CLP patients<br>I= Alveolar bone grafting with presurgical orthodontics<br>C= None<br>O= Bone volume and complications after ABG                                                                                                                                                                                                          | Partially conclusive |
| 77 | Outcome assessment C15                                                          | Osorio et al         | 97  | 2020 | P= Patients with alveolar clefts<br>I= Synthetic bone substitutes and autogenous bone grafts<br>C= Autogenous bone grafts<br>O= Changes in bone density, volume and height, decrease in the rate of bone resorption and bone formation on imaging                                                                                            | Partially conclusive |
| 78 | Outcome assessment C15                                                          | Xiao et al           | 98  | 2020 | P= Alveolar cleft patients<br>I= Bone morphogenetic protein-2(BMP-2)<br>C= Iliac cancellous bone grafting (IBCG)<br>O= Effect on alveolar cleft bone grafting(ACBG)                                                                                                                                                                          | Conclusive           |
| 79 | Orthodontic and Surgical Perspectives of Secondary Alveolar Bone Grafting C5    | Alkaabi et al        | 99  | 2021 | P= CLP patients who underwent treatment of alveolar bone defects<br>I = Alveolar bone grafting using regenerative bone graft<br>C=Iliac crest graft<br>O= New bone formation.                                                                                                                                                                | Partially conclusive |
| 80 | Outcome assessment C15                                                          | Carbullido et al     | 100 | 2021 | P= Patients who underwent PABG at 24 months of age or younger and a minimum of 5 year follow-up<br>I= Clinical and radiographic evaluation<br>C= Control, SABG/ non-cleft group<br>O= (1) bone graft survival, (2) craniofacial skeletal relationships, (3) occlusion and arch forms, and (4) recommendations for utilizing PABG in practice | Partially conclusive |
| 81 | Orthodontic and Surgical Perspectives of Secondary Alveolar Bone Grafting C5    | Chetpakdeechit et al | 101 | 2021 | P= CLP patients,<br>I= Surgical technique, grafting material, parameters<br>C= None                                                                                                                                                                                                                                                          | Inconclusive         |

**Annexure 5:** Detailed characteristics of the included studies including Domain, Subdomain I and code, Subdomain II and code ( refer to Figure 1 and Table 1 for subdomains and codes), author, reference number (as numbered in the reference list of paper) year, aims and objectives in P (Population) I/E (Intervention/exposure) C (Comparison) O (Outcome), and grade of conclusion. Color codes have been done for different Domains and subdomains (I and II) are as presented in Table 1. Abbreviations: CLP (cleft lip and/ or cleft palate), CL (cleft lip), CP (cleft palate), CLA (Cleft lip alveolus), UCLP (Unilateral cleft lip and palate), BCLP (bilateral cleft lip and palate). Refer to main text of the systematic review using reference number (3<sup>rd</sup> column).

|                                                                                                                                             |                                                                              |                     |                  |      |                                                                                                                                                                                                                                                                                      |                      |
|---------------------------------------------------------------------------------------------------------------------------------------------|------------------------------------------------------------------------------|---------------------|------------------|------|--------------------------------------------------------------------------------------------------------------------------------------------------------------------------------------------------------------------------------------------------------------------------------------|----------------------|
|                                                                                                                                             |                                                                              |                     |                  |      | O= Level of the grafted bone, achievement of orthodontic tooth movement into the grafted area, need for re-operation.                                                                                                                                                                |                      |
| 82                                                                                                                                          | Orthodontic and Surgical Perspectives of Secondary Alveolar Bone Grafting C5 | Deshpande et al     | 102              | 2021 | P= Patients undergoing alveolar grafting surgery<br>I= PRP in combination with autogenous iliac bone graft<br>C= Conventional iliac bone graft<br>O= Quantitative bone regeneration                                                                                                  | Conclusive           |
| Sub-domain I - Orthognathic and osteogenic distraction surgical orthodontics C11                                                            |                                                                              |                     |                  |      |                                                                                                                                                                                                                                                                                      |                      |
| Nos .                                                                                                                                       | Subdomain II and code                                                        | Author              | Reference number | Year | Aim and objectives in PICO : Population (P), Intervention (I), Comparision (C), Outcome (O)                                                                                                                                                                                          | Grade of Conclusion  |
| 83                                                                                                                                          | Outcome assessment C15                                                       | Saltaji et al       | 103              | 2012 | P= Patients With CLP<br>I= Maxillary Advancement With Conventional Orthognathic Surgery<br>C= None<br>O= skeletal stability                                                                                                                                                          | Conclusive           |
| 84                                                                                                                                          | Outcome assessment C15                                                       | Saltaji et al       | 104              | 2012 | P=CLP patients<br>I= Maxillary advancement with distraction osteogenesis<br>C= None<br>O= Long-term skeletal stability                                                                                                                                                               | Conclusive           |
| 85                                                                                                                                          | Outcome assessment C15                                                       | Viwattanatipa et al | 105              | 2015 | P= CLP patients<br>I= Orthognathic surgery and distraction osteogenesis<br>C= None<br>O= Mandibular plane change after surgery                                                                                                                                                       | Conclusive           |
| 86                                                                                                                                          | Outcome assessment C15                                                       | Jiang et al         | 106              | 2020 | P= Non-growing patients with CLP (>14 years of age)<br>I= LFI with rigid fixation, LFIDO, or AMDO was performed to treat maxillary hypoplasia<br>C= None<br>O= Horizontal changes to the maxilla at >6 months after LFI surgery with rigid fixation or after distraction by LFIDO or | Conclusive           |
| Sub-domain I - Other surgical aspects of cleft lip and palate including revisions, scar management, post-operative pain and anaesthesia C12 |                                                                              |                     |                  |      |                                                                                                                                                                                                                                                                                      |                      |
| Nos .                                                                                                                                       | Subdomain II and code                                                        | Author              | Reference number | Year | Aim and objectives in PICO: Population (P), Intervention (I), Comparision (C), Outcome (O)                                                                                                                                                                                           | Grade of Conclusion  |
| 87                                                                                                                                          | Effects/Complications of Surgical treatment and/or alveolar bone grafting D4 | Suresh et al        | 107              | 2014 | P= Paediatric patients undergoing different surgical procedures I= regional anaesthesia techniques<br>C= None<br>O = Postoperative pain                                                                                                                                              | Partially conclusive |
| 88                                                                                                                                          | Cleft Lip repair C8                                                          | Feriani et al       | 108              | 2016 | P= Children with CL<br>I= Infraorbital nerve block<br>C= Placebo<br>O= Pain score control, Duration of postoperative analgesia, Adverse events, Supplemental analgesic requirements                                                                                                  | Inconclusive         |

**Annexure 5:** Detailed characteristics of the included studies including Domain, Subdomain I and code, Subdomain II and code ( refer to Figure 1 and Table 1 for subdomains and codes), author, reference number (as numbered in the reference list of paper) year, aims and objectives in P (Population) I/E (Intervention/exposure) C (Comparison) O (Outcome), and grade of conclusion. Color codes have been done for different Domains and subdomains (I and II) are as presented in Table 1. Abbreviations: CLP (cleft lip and/ or cleft palate), CL (cleft lip), CP (cleft palate), CLA (Cleft lip alveolus), UCLP (Unilateral cleft lip and palate), BCLP (bilateral cleft lip and palate). Refer to main text of the systematic review using reference number (3<sup>rd</sup> column).

|                                                              |                                                                                 |                       |                  |      |                                                                                                                                                                                                                                                                                                                                                                                         |                      |
|--------------------------------------------------------------|---------------------------------------------------------------------------------|-----------------------|------------------|------|-----------------------------------------------------------------------------------------------------------------------------------------------------------------------------------------------------------------------------------------------------------------------------------------------------------------------------------------------------------------------------------------|----------------------|
| 89                                                           | Effects/Complications of Surgical treatment and/or alveolar bone grafting D4    | Kendall et al         | 109              | 2018 | P= Pediatric population<br>I= Regional anesthesia<br>C= Local anesthetics and a control group in pediatric patients undergoing various surgical procedures<br>O= Improvement of postoperative analgesia, complications associated with regional anesthesia                                                                                                                              | Inconclusive         |
| 90                                                           | Alveolar bone grafting and graft materials C10                                  | Tache and Mommaerts   | 110              | 2019 | P= Hospitalized CL and alveolus patients with or without cleft palate undergoing iliac crest bone grafting<br>I= Assessment of intraoperative pain control methods used after alveolar bone grafting<br>C= Evidence<br>O= Duration of hospital stay, subjective pain rating, and degree of impaired mobility.                                                                           | Inconclusive         |
| 91                                                           | Cleft alveolus, submucous cleft and all types of cleft palate closure/repair C9 | Liu et al             | 111              | 2021 | P= Patients with CLP repair<br>I= Dexmedetomidine<br>C= Controls (including saline and other drugs)<br>O= Efficaciousness of dexmedetomidine (the primary outcome was the incidence of EA, the secondary outcome was the need for postoperative rescue analgesia and the third outcomes were the incidence of adverse effects)                                                          | Partially conclusive |
| Sub-domain I - Management of speech and hearing problems C14 |                                                                                 |                       |                  |      |                                                                                                                                                                                                                                                                                                                                                                                         |                      |
| Nos                                                          | Subdomain II and code                                                           | Author                | Reference number | Year | Aim and objectives in PICO: Population (P), Intervention (I), Comparison (C), Outcome (O)                                                                                                                                                                                                                                                                                               | Grade of Conclusion  |
| 92                                                           | Cleft alveolus, submucous cleft and all types of cleft palate closure/repair C9 | Nasser et al          | 112              | 2008 | P= Children or adolescents, 3 years or older, with an established diagnosis of velopharyngeal insufficiency (VPI) associated with submucous cleft palate<br>I= Surgical procedures, either against each other or no treatment, to correct velopharyngeal insufficiency (VPI) in submucous cleft palate<br>C= None<br>O= Perpetual speech assessment and treatment outcome after surgery | Inconclusive         |
| 93                                                           | N/A                                                                             | Lee et al             | 113              | 2009 | P= Individuals with articulation problems associated with cleft palate<br>I= Electropalatography<br>C= No treatment, delayed treatment, “standard treatment”, or alternative treatment techniques<br>O= Measure of correct articulation of speech sounds targeted in therapy,                                                                                                           | Inconclusive         |
| 94                                                           | N/A                                                                             | Meinusch and Romonath | 114              | 2011 | P= Children with CL and/or palate up to 4;11 years old<br>I= Early language intervention focusing<br>C= None<br>O= Outcomes related to receptive or expressive vocabulary                                                                                                                                                                                                               | Inconclusive         |
| 95                                                           | N/A                                                                             | Bessell et al         | 115              | 2013 | P=Children with CP +/- L were included in the review. Studies had to include at least 90% of children with non-syndromic CLP or with no known developmental delay<br>I= Speech language therapy (SLT) intervention,<br>C= No intervention control group or a different SLT intervention were used as comparators,<br>O= Any speech and/or language outcome                              | Inconclusive         |

**Annexure 5:** Detailed characteristics of the included studies including Domain, Subdomain I and code, Subdomain II and code ( refer to Figure 1 and Table 1 for subdomains and codes), author, reference number (as numbered in the reference list of paper) year, aims and objectives in P (Population) I/E (Intervention/exposure) C (Comparison) O (Outcome), and grade of conclusion. Color codes have been done for different Domains and subdomains (I and II) are as presented in Table 1. Abbreviations: CLP (cleft lip and/ or cleft palate), CL (cleft lip), CP (cleft palate), CLA (Cleft lip alveolus), UCLP (Unilateral cleft lip and palate), BCLP (bilateral cleft lip and palate). Refer to main text of the systematic review using reference number (3<sup>rd</sup> column).

|                                       |                                                                                 |                |                  |      |                                                                                                                                                                                                                                                                                                                                                                                                                                                                                  |                      |
|---------------------------------------|---------------------------------------------------------------------------------|----------------|------------------|------|----------------------------------------------------------------------------------------------------------------------------------------------------------------------------------------------------------------------------------------------------------------------------------------------------------------------------------------------------------------------------------------------------------------------------------------------------------------------------------|----------------------|
| 96                                    | Cleft alveolus, submucous cleft and all types of cleft palate closure/repair C9 | Gilleard et al | 116              | 2014 | P= patients with VPI secondary to SMCP<br>I=Various surgical management (Von Langenbeck and pharyngeal flap minimal incision palatopharyngoplasty)<br>C= other surgical methods as control (e.g. incision palatopharyngoplasty combined with either pharyngoplasty or a pharyngeal flap)<br>O= postoperative speech                                                                                                                                                              | Inconclusive         |
| 97                                    | Effects/Complications of Surgical treatment and/or alveolar bone grafting D4    | Kuo et al      | 117              | 2014 | P=CLP patients<br>I= ventilation tube insertion (Grommet)<br>C= None<br>O= effectiveness, Otitis media                                                                                                                                                                                                                                                                                                                                                                           | Inconclusive         |
| 98                                    | N/A                                                                             | Lane et al     | 118              | 2020 | P= children with cleft palate<br>I= early speech interventions<br>C= watchful waiting group, where no direct intervention was provided, or an active, direct therapy group where an alternative intervention was provided<br>O= treatment outcome                                                                                                                                                                                                                                | Inconclusive         |
| 99                                    | Outcome assessment C15                                                          | Sand et al     | 119              | 2022 | P= individuals born with CLP<br>I=Speech-Language Therapy (SLT)<br>C= None<br>O= benefit of SLT (an outcome that is related to speech production, language ability, intelligibility, or PROs)                                                                                                                                                                                                                                                                                    | Partially conclusive |
| Sub-domain I - Outcome assessment C15 |                                                                                 |                |                  |      |                                                                                                                                                                                                                                                                                                                                                                                                                                                                                  |                      |
| Nos                                   | Subdomain II and code                                                           | Author         | Reference number | Year | Aim and objectives in PICO: Population (P), Intervention (I), Comparison (C), Outcome (O)                                                                                                                                                                                                                                                                                                                                                                                        | Grade of Conclusion  |
| 100                                   | Feeding and nutrition in patients C2                                            | Bessell et al  | 120              | 2011 | P= Babies with CLP<br>I= Various feeding interventions<br>C= unmodified equipment or advice<br>O= growth, development, parental satisfaction                                                                                                                                                                                                                                                                                                                                     | Partially conclusive |
| 101                                   | Orthognathic and osteogenic distraction surgical orthodontics C11               | Sharshar et al | 121              | 2012 | P= Patients with CLP who have undergone Maxillary Anterior Advancement by Distraction Osteogenesis<br>I= Cephalometric Evaluation<br>C= None<br>O= Upper airway size and nasal resistance                                                                                                                                                                                                                                                                                        | Inconclusive         |
| 102                                   | Orthognathic and osteogenic distraction surgical orthodontics C11               | Austin et al   | 122              | 2015 | P= Patients with CLP aged over 16 years with moderate maxillary hypoplasia requiring 4–10 mm of maxillary advancement<br>I= The active intervention of distraction osteogenesis(DO),<br>C= The control intervention of conventional orthognathic surgery (CO)<br>O= 1. Maxillary correction achieved with the two interventions, 2. Post-operative skeletal stability of the maxilla, 3. Speech and velopharyngeal function, 4. Psychological adjustment and quality of life, 5. | Inconclusive         |

**Annexure 5:** Detailed characteristics of the included studies including Domain, Subdomain I and code, Subdomain II and code ( refer to Figure 1 and Table 1 for subdomains and codes), author, reference number (as numbered in the reference list of paper) year, aims and objectives in P (Population) I/E (Intervention/exposure) C (Comparison) O (Outcome), and grade of conclusion. Color codes have been done for different Domains and subdomains (I and II) are as presented in Table 1. Abbreviations: CLP (cleft lip and/ or cleft palate), CL (cleft lip), CP (cleft palate), CLA (Cleft lip alveolus), UCLP (Unilateral cleft lip and palate), BCLP (bilateral cleft lip and palate). Refer to main text of the systematic review using reference number (3<sup>rd</sup> column).

|     |                                                                                 |                  |     |      |                                                                                                                                                                                                                                                                                                                                                                                                                                                |                      |
|-----|---------------------------------------------------------------------------------|------------------|-----|------|------------------------------------------------------------------------------------------------------------------------------------------------------------------------------------------------------------------------------------------------------------------------------------------------------------------------------------------------------------------------------------------------------------------------------------------------|----------------------|
|     |                                                                                 |                  |     |      | Outcomes relating to harms, risks and benefits.                                                                                                                                                                                                                                                                                                                                                                                                |                      |
| 103 | Psychosocial aspects, perceptions and quality of life of patients with CLP E2   | Norman et al     | 123 | 2015 | P= Non-syndromic CL/P with or without cleft alveolus or individuals with syndromes with no known developmental delay, I= All interventions addressing psychosocial adjustment<br>C= No intervention or that compared either different psychosocial interventions or psychosocial interventions at different points<br>O= Any outcome measures related to psychosocial functioning                                                              | Inconclusive         |
| 104 | Presurgical Infant Orthopaedics and Naso-Alveolar Moulding C3                   | Hosseini et al   | 124 | 2017 | P= Children of any age with any kind of non-syndromic CLP defect<br>I= Any type of PSIO appliance<br>C= No treatment or an alternative PSIO protocol<br>O= Treatment outcome (effectiveness)                                                                                                                                                                                                                                                   | Partially conclusive |
| 105 | Cleft alveolus, submucous cleft and all types of cleft palate closure/repair C9 | El-Ashmawi et al | 125 | 2018 | P=CLP (Unilateral or bilateral)<br>I=Patients who had only GPP done for alveolar bone reconstruction (primary or secondary) with or without adjunctive PSIO<br>C= Patients without GPP, may comprise patients with CLP evaluated before age of bone graft (during early childhood, Patients with CLP evaluated during late childhood and adolescence, ie, after age of bone graft (SBG group)<br>O= 1: Alveolar bone quality, 2: Facial growth | Inconclusive         |
| 106 | Orthognathic and osteogenic distraction surgical orthodontics C11               | Kloukos et al    | 126 | 2018 | P= Cleft patients<br>I= Maxillary distraction osteogenesis<br>C= Orthognathic surgery<br>O= Maxillary advancement, Long-term skeletal relapse, Speech, Velopharyngeal function, Psychological status                                                                                                                                                                                                                                           | Inconclusive         |
| 107 | Advanced radiography including 3D imaging and 3D printing B6                    | Awarun et al     | 127 | 2019 | P= Cleft patients after cleft-related treatment during growth<br>I=Three-dimensional (3D) imaging methods<br>C=None<br>O= Quantification of the changes in soft- and hard tissues in cleft patients after cleft-related treatment during growth                                                                                                                                                                                                | Inconclusive         |
| 108 | Indices of CLP B2                                                               | Kuang et al      | 128 | 2021 | P= BCLP<br>I= Huddart-Bodenham Scoring System and the BCLP Yardstick<br>C= None<br>O= Treatment Outcome                                                                                                                                                                                                                                                                                                                                        | Inconclusive         |
| 109 | Orthognathic and osteogenic distraction surgical orthodontics C11               | Nimbalkar et al  | 129 | 2021 | P= Adult/non-growing CLP patients (15–30 years)<br>I= Maxillary advancement with DO using RED device<br>C= Young/growing CLP patients (7–14.9 years) O= Horizontal changes at the maxilla at >12 months after DO using RED.<br>The measurement of change at point A on the horizontal reference line using an x-y coordinate system.                                                                                                           | Conclusive           |



**Annexure 5:** Detailed characteristics of the included studies including Domain, Subdomain I and code, Subdomain II and code ( refer to Figure 1 and Table 1 for subdomains and codes), author, reference number (as numbered in the reference list of paper) year, aims and objectives in P (Population) I/E (Intervention/exposure) C (Comparison) O (Outcome), and grade of conclusion. Color codes have been done for different Domains and subdomains (I and II) are as presented in Table 1. Abbreviations: CLP (cleft lip and/ or cleft palate), CL (cleft lip), CP (cleft palate), CLA (Cleft lip alveolus), UCLP (Unilateral cleft lip and palate), BCLP (bilateral cleft lip and palate). Refer to main text of the systematic review using reference number (3<sup>rd</sup> column).

|                                                                                                    |                                                                                 |                        |                         |             |                                                                                                                                                                                                                                                                                                                                         |                            |
|----------------------------------------------------------------------------------------------------|---------------------------------------------------------------------------------|------------------------|-------------------------|-------------|-----------------------------------------------------------------------------------------------------------------------------------------------------------------------------------------------------------------------------------------------------------------------------------------------------------------------------------------|----------------------------|
| 110                                                                                                | Presurgical Infant Orthopaedics and Naso-Alveolar Moulding C3                   | Sazo et al             | 130                     | 2021        | P= Patients with CLP<br>I= Presurgical orthopedics<br>C= None<br>O= Effect on esthetics, feeding, and the gap between maxillary segments.                                                                                                                                                                                               | Conclusive                 |
| <b>Domain. D. PROGNOSTIC</b>                                                                       |                                                                                 |                        |                         |             |                                                                                                                                                                                                                                                                                                                                         |                            |
| <b>Sub-domain I - Effects/Complications of Surgical treatment and/or alveolar bone grafting D4</b> |                                                                                 |                        |                         |             |                                                                                                                                                                                                                                                                                                                                         |                            |
| <i>Nos</i>                                                                                         | <i>Subdomain II and code</i>                                                    | <i>Author</i>          | <i>Reference number</i> | <i>Year</i> | <i>Aim and objectives in PICO: Population (P), Intervention (I), Comparison (C), Outcome (O)</i>                                                                                                                                                                                                                                        | <i>Grade of Conclusion</i> |
| 111                                                                                                | Cleft alveolus, submucous cleft and all types of cleft palate closure/repair C9 | Hardwicke et al        | 131                     | 2014        | P= Human participants with non-syndromic cleft palate who underwent primary cleft palate repair<br>I= Primary repair of cleft palate; all ages at intervention; all surgical repair techniques<br>C=None<br>O= Number of reported oronasal fistulae as a proportion of the entire cohort                                                | Conclusive                 |
| 112                                                                                                | Cleft alveolus, submucous cleft and all types of cleft palate closure/repair C9 | Felton et al           | 132                     | 2017        | P= Infants with CLP<br>I= Early ventilation tube placement prior to palatoplasty<br>C= CL repair only (control group)<br>O= Prevalence of OME preoperatively, Complications of ventilation tubes, ventilation tube function/patency, hearing loss (conductive) and speech development                                                   | Partially conclusive       |
| 113                                                                                                | Cleft alveolus, submucous cleft and all types of cleft palate closure/repair C9 | Kappen et al           | 133                     | 2018        | P= Patients with unilateral CLP<br>I/E= Gender, the timing of hard palate closure, soft palate closure, the alveolar bone graft, surgical approach (one-stage vs. two-stage palatoplasty), the incidence of fistulas, the incidence of pharyngoplasty<br>C= None<br>O= Influence of treatment factors on long-term maxillary growth     | Inconclusive               |
| 114                                                                                                | Orthognathic and osteogenic distraction surgical orthodontics C11               | Liu et al              | 134                     | 2018        | P= Growing Children with CLP<br>I= Maxillary Distraction Osteogenesis<br>C= None<br>O= Long-Term Skeletal Changes                                                                                                                                                                                                                       | Conclusive                 |
| 115                                                                                                | Orthognathic and osteogenic distraction surgical orthodontics C11               | Dos Santos Alves et al | 135                     | 2019        | P= Individuals submitted to Le Fort I osteotomy<br>I= Method to assess cranial nerve function<br>C= None<br>O= Signs and symptoms associated with cranial nerve injuries                                                                                                                                                                | Partially conclusive       |
| 116                                                                                                | Cleft alveolus, submucous cleft and all types of cleft palate closure/repair C9 | Minatel et al          | 136                     | 2019        | P= Non-syndromic patients with CLP<br>I= Patients who underwent vomer flap for correction of cleft in the hard palate<br>C= Patients who underwent other surgical techniques for correction of cleft in the hard palate<br>O= Craniofacial growth (primary outcome); speech development and occurrence of fistula (secondary outcomes). | Conclusive                 |



**Annexure 5:** Detailed characteristics of the included studies including Domain, Subdomain I and code, Subdomain II and code ( refer to Figure 1 and Table 1 for subdomains and codes), author, reference number (as numbered in the reference list of paper) year, aims and objectives in P (Population) I/E (Intervention/exposure) C (Comparison) O (Outcome), and grade of conclusion. Color codes have been done for different Domains and subdomains (I and II) are as presented in Table 1. Abbreviations: CLP (cleft lip and/ or cleft palate), CL (cleft lip), CP (cleft palate), CLA (Cleft lip alveolus), UCLP (Unilateral cleft lip and palate), BCLP (bilateral cleft lip and palate). Refer to main text of the systematic review using reference number (3<sup>rd</sup> column).

|                                                                                         |                                                                                                                              |                     |                  |      |                                                                                                                                                                                                                                                                                                                                                                                                |                      |
|-----------------------------------------------------------------------------------------|------------------------------------------------------------------------------------------------------------------------------|---------------------|------------------|------|------------------------------------------------------------------------------------------------------------------------------------------------------------------------------------------------------------------------------------------------------------------------------------------------------------------------------------------------------------------------------------------------|----------------------|
| 117                                                                                     | Cleft alveolus, submucous cleft and all types of cleft palate closure/repair C9                                              | Tache and Mommaerts | 137              | 2019 | P= Non-syndromic CLP patients who underwent primary cleft surgery<br>I= Technique and timing of the primary surgery and type of cleft<br>C= Secondary CLP repair<br>O= Occurrence of the oronasal fistula                                                                                                                                                                                      | Conclusive           |
| 118                                                                                     | Conventional radiography and 2D imaging B4                                                                                   | Corthouts et al     | 138              | 2020 | P= Non-syndromic UCLP patient population over 6 years old who underwent various surgical protocols<br>I= Cephalometric evaluation<br>C=Control or comparison group<br>O= Maxillofacial growth                                                                                                                                                                                                  | Partially conclusive |
| 119                                                                                     | Other surgical aspects of cleft lip and palate including revisions, scar management, post-operative pain and anaesthesia C12 | Miranda et al       | 139              | 2020 | P= CLP patients following primary surgery<br>I= Fistula treatment<br>C= None<br>O= Fistula closure, recurrence of fistulas, residual fistulas, suture dehiscence, postoperative infections, failures in healing                                                                                                                                                                                | Partially conclusive |
| 120                                                                                     | Cleft alveolus, submucous cleft and all types of cleft palate closure/repair C9                                              | Vandenberg et al    | 140              | 2020 | P= patients with CLP<br>I= Vomer Flap Repair<br>C= None<br>O= incidence of oronasal fistulas                                                                                                                                                                                                                                                                                                   | Conclusive           |
| 121                                                                                     | Orthognathic and osteogenic distraction surgical orthodontics C11                                                            | Velasques et al     | 141              | 2020 | P= CLP patients<br>I= Le Fort 1 osteotomy<br>C= None<br>O= Maxillary relapse                                                                                                                                                                                                                                                                                                                   | Partially conclusive |
| 122                                                                                     | Cleft Lip repair C8                                                                                                          | Egbunah et al       | 142              | 2021 | P= Patients with CL undergoing surgical repair<br>I= Techniques of CL repair using resorbable sutures, nonabsorbable sutures, medical adhesives, or any combination of these,<br>C= Various sutures used for CL repair<br>O= Wound healing cosmesis and wound healing complications, quality of life, direct and indirect costs to patients and health services, and participant satisfaction. | Inconclusive         |
| 123                                                                                     | Orthognathic and osteogenic distraction surgical orthodontics C11                                                            | Valls-Ontanon et al | 143              | 2021 | P= CLP patients<br>I= Le Fort I osteotomy<br>C= Different surgical protocols<br>O= Stability, recurrence or surgical complications;                                                                                                                                                                                                                                                            | Partially conclusive |
| Sub-domain I - Oral health aspects including dental caries and other dental problems D6 |                                                                                                                              |                     |                  |      |                                                                                                                                                                                                                                                                                                                                                                                                |                      |
| Nos                                                                                     | Subdomain II and code                                                                                                        | Author              | Reference number | Year | Aim and objectives in PICO: Population (P), Intervention (I), Comparison (C), Outcome (O)                                                                                                                                                                                                                                                                                                      | Grade of Conclusion  |
| 124                                                                                     | N/A                                                                                                                          | Worth et al         | 144              | 2017 | P= Children born with an orofacial cleft<br>I= Prevalence of dental caries                                                                                                                                                                                                                                                                                                                     | Conclusive           |

**Annexure 5:** Detailed characteristics of the included studies including Domain, Subdomain I and code, Subdomain II and code ( refer to Figure 1 and Table 1 for subdomains and codes), author, reference number (as numbered in the reference list of paper) year, aims and objectives in P (Population) I/E (Intervention/exposure) C (Comparison) O (Outcome), and grade of conclusion. Color codes have been done for different Domains and subdomains (I and II) are as presented in Table 1. Abbreviations: CLP (cleft lip and/ or cleft palate), CL (cleft lip), CP (cleft palate), CLA (Cleft lip alveolus), UCLP (Unilateral cleft lip and palate), BCLP (bilateral cleft lip and palate). Refer to main text of the systematic review using reference number (3<sup>rd</sup> column).

|                                                                                                                                                                    |                                                               |                   |                         |             |                                                                                                                                                                                                                                                                                      |                                          |
|--------------------------------------------------------------------------------------------------------------------------------------------------------------------|---------------------------------------------------------------|-------------------|-------------------------|-------------|--------------------------------------------------------------------------------------------------------------------------------------------------------------------------------------------------------------------------------------------------------------------------------------|------------------------------------------|
|                                                                                                                                                                    |                                                               |                   |                         |             | C= Individuals without cleft<br>O= Risk of dental caries                                                                                                                                                                                                                             |                                          |
| 125                                                                                                                                                                | Conventional orthodontics C6                                  | Vale et al        | 145                     | 2021        | P= CLP patients that underwent orthodontic treatment<br>I= Methods for assessment of S. mutans count<br>C= The control group consisted of participants that underwent orthodontic treatment without CLP<br>O= Levels of S. mutans and Lactobacillus higher to 10 <sup>5</sup> CFU/ml | Partially conclusive                     |
| <b>Domain. E. PSYCHOSOCIAL ASPECTS</b>                                                                                                                             |                                                               |                   |                         |             |                                                                                                                                                                                                                                                                                      |                                          |
| <b>Sub-domain I - Psychosocial aspects, perceptions and quality of life of family members of the patients with CLP, lay people and healthcare professionals E1</b> |                                                               |                   |                         |             |                                                                                                                                                                                                                                                                                      |                                          |
| <i>Nos</i>                                                                                                                                                         | <i>Subdomain II and code</i>                                  | <i>Author</i>     | <i>Reference number</i> | <i>Year</i> | <i>Aim and objectives in PICO : Population (P), Intervention (I), Comparision (C), Outcome (O)</i>                                                                                                                                                                                   | <i>Grade of Conclusion</i>               |
| 126                                                                                                                                                                | N/A                                                           | Zhu et al         | 146                     | 2016        | P= CLP patients' visualization by lay people<br>I= Full facial images<br>C= CLP visualization by professionals<br>O= Difference in critical appraisal in facial appearance of CLP patients                                                                                           | Inconclusive                             |
| 127                                                                                                                                                                | Presurgical Infant Orthopaedics and Naso-Alveolar Moulding C3 | El-Ghafour et al  | 147                     | 2020        | P= Parents with unilateral CLP infants<br>I= AM and NAM appliances<br>C= Untreated control (only surgical lip repair)<br>O= Parents' satisfaction                                                                                                                                    | Inconclusive                             |
| 128                                                                                                                                                                | Feeding and nutrition in patients C2                          | Srivastav et al   | 148                     | 2021        | P= Parents of children with CLP<br>I= Questionnaires for assessment of parental response to feeding<br>C= Comparator Not applicable<br>O= Outcome Parental response to feeding behaviour                                                                                             | Partially conclusive                     |
| <b>Sub-domain I - Psychosocial aspects, perceptions and quality of life of patients with CLP E2</b>                                                                |                                                               |                   |                         |             |                                                                                                                                                                                                                                                                                      |                                          |
| <i>Nos</i>                                                                                                                                                         | <i>Subdomain II and code</i>                                  | <i>Author</i>     | <i>Reference number</i> | <i>Year</i> | <i>Population (P), Intervention (I), Comparision (C), Outcome (O)</i>                                                                                                                                                                                                                | <i>Conclusion derived from the study</i> |
| 129                                                                                                                                                                | N/A                                                           | Antonarakis et al | 149                     | 2013        | P= Non-syndromic CLP patients<br>I= questionnaire<br>C= healthy non-cleft individuals<br>O= OHRQoL                                                                                                                                                                                   | Conclusive                               |
| 130                                                                                                                                                                | N/A                                                           | Herkraht et al    | 150                     | 2015        | P= Individuals with Non-syndromic Orofacial Clefts<br>I= Questionnaire<br>C= children without cleft<br>O= Health-Related and Oral Health-Related Quality of Life                                                                                                                     | Conclusive                               |

**Annexure 5:** Detailed characteristics of the included studies including Domain, Subdomain I and code, Subdomain II and code ( refer to Figure 1 and Table 1 for subdomains and codes), author, reference number (as numbered in the reference list of paper) year, aims and objectives in P (Population) I/E (Intervention/exposure) C (Comparison) O (Outcome), and grade of conclusion. Color codes have been done for different Domains and subdomains (I and II) are as presented in Table 1. Abbreviations: CLP (cleft lip and/ or cleft palate), CL (cleft lip), CP (cleft palate), CLA (Cleft lip alveolus), UCLP (Unilateral cleft lip and palate), BCLP (bilateral cleft lip and palate). Refer to main text of the systematic review using reference number (3<sup>rd</sup> column).

|                                                  |                                                                                                                              |                  |                  |      |                                                                                                                                                                                                                                                                                                                                                                |                                   |
|--------------------------------------------------|------------------------------------------------------------------------------------------------------------------------------|------------------|------------------|------|----------------------------------------------------------------------------------------------------------------------------------------------------------------------------------------------------------------------------------------------------------------------------------------------------------------------------------------------------------------|-----------------------------------|
| 131                                              | N/A                                                                                                                          | Chung et al      | 151              | 2019 | P= CLP paediatric patients in low-resource areas<br>E= social stigma<br>C= children without CLP/ children with CLP in high income countries<br>O= impact of social stigma and psychosocial aspects                                                                                                                                                             | Conclusive                        |
| 132                                              | Other surgical aspects of cleft lip and palate including revisions, scar management, post-operative pain and anaesthesia C12 | Acum et al       | 152              | 2020 | P=CLP patients at the end of the cleft surgery pathway<br>I= Questionnaire assessing patients related PROs,<br>C= Comparator group<br>O= Psychosocial patient-reported outcomes                                                                                                                                                                                | Inconclusive                      |
| 133                                              | Anatomical and functional characteristics A6                                                                                 | Glinianaia et al | 153              | 2021 | P= Children with congenital anomalies<br>I= (School test/ Questionnaire-based) or data on special education needs (SEN)<br>C=controls<br>O= academic outcomes and special education needs (SEN)                                                                                                                                                                | Conclusive                        |
| 134                                              | Conventional orthodontics C6                                                                                                 | Nascimento et al | 154              | 2021 | P= Patients with CL and/or palate of all ages undergoing orthodontic treatment. Syndromic patients or patients with neurological disorders were excluded<br>I= Any form of orthodontic treatment, interceptive and/or corrective, involving all age groups<br>C= Different clinical and demographic factors<br>O= Measurement of OHRQoL through questionnaires | Conclusive                        |
| Sub-domain I - Burden of care E3                 |                                                                                                                              |                  |                  |      |                                                                                                                                                                                                                                                                                                                                                                |                                   |
| Nos .                                            | Subdomain II and code                                                                                                        | Author           | Reference number | Year | Population (P), Intervention (I), Comparision (C), Outcome (O)                                                                                                                                                                                                                                                                                                 | Conclusion derived from the study |
| 135                                              | Presurgical Infant Orthopaedics and Naso-Alveolar Moulding C3                                                                | Alfonso et al    | 155              | 2020 | P= Care givers of CLP patients who underwent Naso-alveolar molding<br>I= Various questionnaires<br>C= None<br>O= Burden of Care of Naso-alveolar molding (physical, psychosocial, or financial burden)                                                                                                                                                         | Partially conclusive              |
| Sub-domain I - Health economics E4               |                                                                                                                              |                  |                  |      |                                                                                                                                                                                                                                                                                                                                                                |                                   |
| Nos .                                            | Subdomain II and code                                                                                                        | Author           |                  | Year | Population (P), Intervention (I), Comparision (C), Outcome (O)                                                                                                                                                                                                                                                                                                 | Conclusion derived from the study |
| 136                                              | Burden of care E3                                                                                                            | Saxton et al     | 156              | 2016 | P= Children in Low- and Middle-Income Countries<br>I= Surgical Care<br>C= None<br>O= Economic Analysis/ economic impact                                                                                                                                                                                                                                        | Partially conclusive              |
| Domain. F. PREVENTIVE                            |                                                                                                                              |                  |                  |      |                                                                                                                                                                                                                                                                                                                                                                |                                   |
| Sub-domain I - Risk assessment and prediction F2 |                                                                                                                              |                  |                  |      |                                                                                                                                                                                                                                                                                                                                                                |                                   |

**Annexure 5:** Detailed characteristics of the included studies including Domain, Subdomain I and code, Subdomain II and code ( refer to Figure 1 and Table 1 for subdomains and codes), author, reference number (as numbered in the reference list of paper) year, aims and objectives in P (Population) I/E (Intervention/exposure) C (Comparison) O (Outcome), and grade of conclusion. Color codes have been done for different Domains and subdomains (I and II) are as presented in Table 1. Abbreviations: CLP (cleft lip and/ or cleft palate), CL (cleft lip), CP (cleft palate), CLA (Cleft lip alveolus), UCLP (Unilateral cleft lip and palate), BCLP (bilateral cleft lip and palate). Refer to main text of the systematic review using reference number (3<sup>rd</sup> column).

| Nos                                                                         | Subdomain II and code                                                    | Author          | Reference number | Year | Population (P), Intervention (I), Comparison (C), Outcome (O)                                                                                                                               | Conclusion derived from the study |
|-----------------------------------------------------------------------------|--------------------------------------------------------------------------|-----------------|------------------|------|---------------------------------------------------------------------------------------------------------------------------------------------------------------------------------------------|-----------------------------------|
| 137                                                                         | Genetics A4                                                              | Zhao et al      | 157              | 2016 | P= Non-syndromic cleft of the lip and/or palate<br>E= MTHFD1 polymorphism rs 2236225<br>C= None<br>O= Association between the NSCL/P and MTHFD1 polymorphism rs2236225,                     | Partially conclusive              |
| 138                                                                         | Genetics A4                                                              | Wang et al      | 158              | 2018 | P= Non syndromic CLP diagnosed clinically<br>E= WNT3 polymorphisms<br>C= Healthy individuals<br>O= NSCL/P susceptibility                                                                    | Partially conclusive              |
| 139                                                                         | Genetics A4                                                              | Shu et al       | 159              | 2019 | P= Non-syndromic CL with or without palate<br>E= Methylene tetrahydrofolate reductase polymorphisms<br>C= None<br>O= association                                                            | Partially conclusive              |
| 140                                                                         | Genetics A4                                                              | Zhou et al      | 160              | 2020 | P= Pregnant women<br>E= Folate supplement use, dietary folate intake, folic acid fortification, biomarkers of folate status, and MTHFR genetic variants<br>C= None<br>O= non-syndromic OFCs | Partially conclusive              |
| <b>Domain. G. RESEARCH METHODS</b>                                          |                                                                          |                 |                  |      |                                                                                                                                                                                             |                                   |
| <b>Sub-domain I - Clinical practice guidelines and Core outcome sets G1</b> |                                                                          |                 |                  |      |                                                                                                                                                                                             |                                   |
| Nos                                                                         | Subdomain II and code                                                    | Author          | Reference number | Year | Population (P), Intervention (I), Comparison (C), Outcome (O)                                                                                                                               | Conclusion derived from the study |
| 141                                                                         | Oral health aspects including dental caries and other dental problems D6 | Saikia et al    | 161              | 2021 | P= Children With CLP<br>I= Clinical Practice Guidelines(CPGs) for Oral Health<br>C= None<br>O= scope, quality, adequacy, and consistency of CPGs                                            | Partially conclusive              |
| <b>Sub-domain I - Methodological aspects G3</b>                             |                                                                          |                 |                  |      |                                                                                                                                                                                             |                                   |
| Nos                                                                         | Subdomain II and code                                                    | Author          | Reference number | Year | Population (P), Intervention (I), Comparison (C), Outcome (O)                                                                                                                               | Conclusion derived from the study |
| 142                                                                         | N/A                                                                      | Hardwicke et al | 162              | 2017 | P= Patients with CL and/or cleft palate<br>I= None<br>C= none<br>O= Outcome of RCT, S= Prospective randomized clinical trials (RCTs)                                                        | Conclusive                        |

**Annexure 5:** Detailed characteristics of the included studies including Domain, Subdomain I and code, Subdomain II and code ( refer to Figure 1 and Table 1 for subdomains and codes), author, reference number (as numbered in the reference list of paper) year, aims and objectives in P (Population) I/E (Intervention/exposure) C (Comparison) O (Outcome), and grade of conclusion. Color codes have been done for different Domains and subdomains (I and II) are as presented in Table 1. Abbreviations: CLP (cleft lip and/ or cleft palate), CL (cleft lip), CP (cleft palate), CLA (Cleft lip alveolus), UCLP (Unilateral cleft lip and palate), BCLP (bilateral cleft lip and palate). Refer to main text of the systematic review using reference number (3<sup>rd</sup> column).

| Domain. H. RECENT ADVANCES                                                         |                                                |                |                  |      |                                                                                                                                                                      |                                   |
|------------------------------------------------------------------------------------|------------------------------------------------|----------------|------------------|------|----------------------------------------------------------------------------------------------------------------------------------------------------------------------|-----------------------------------|
| Sub-domain I - Any recent research area not covered in the above categorization H1 |                                                |                |                  |      |                                                                                                                                                                      |                                   |
| Nos                                                                                | Subdomain II and code                          | Author         | Reference number | Year | Population (P), Intervention (I), Comparision (C), Outcome (O)                                                                                                       | Conclusion derived from the study |
| 143                                                                                | Alveolar bone grafting and graft materials C10 | Shanbhag et al | 163              | 2019 | P= CLP<br>I= Cell therapy<br>C= Grafting with only biomaterial scaffolds and/or autogenous bone<br>O= Effect of cell therapy in terms of orofacial bone regeneration | Inconclusive                      |
| 144                                                                                | Genetics A4                                    | Wei et al      | 164              | 2022 | P= Non-syndromic CLP patients<br>I= Cell experiment<br>C= Control group<br>O= Association of NSCLP and non-coding RNAs                                               | Conclusive                        |
