# Supplementary material for: Evidence Mapping and Quality Analysis of Systematic Reviews on Various Aspects Related to Cleft Lip and Palate
Source: MDPI journal article supplement (doi:10.3390/jcm12186002), 2023-09-16
Supplement: s1 [file s1]

**Annexure 4:** Detailed characteristics of included studies as Domain, Subdomain I and code, Subdomain II and code ( refer to Figure 1 and Table 1 for subdomains and codes), Author and number of reviewers, reference number (as numbered in the reference list of paper), year, journal of publication, language limits, Time limitation, hand/reference searching, grey literature search, number of databases used, number of included studies, Risk of bias tool used for quality assessment and meta-analysis. (Abbreviation Nos.= Numbers, Y= Present, N= Not present). Color codes have been done for different Domains and subdomains (I and II) are as presented in Table 1.

| Domain. A. EPIDEMIOLOGIC                     |                                              |                                           |                         |             |                                       |                            |                        |                              |                        |                                 |                                   |                                                   |                      |
|----------------------------------------------|----------------------------------------------|-------------------------------------------|-------------------------|-------------|---------------------------------------|----------------------------|------------------------|------------------------------|------------------------|---------------------------------|-----------------------------------|---------------------------------------------------|----------------------|
| Sub-domain I - Incidence and Prevalence (A1) |                                              |                                           |                         |             |                                       |                            |                        |                              |                        |                                 |                                   |                                                   |                      |
| <i>N os.</i>                                 | <i>Subdomain II and code</i>                 | <i>Author and number of reviewers (n)</i> | <i>Reference number</i> | <i>Year</i> | <i>Journal</i>                        | <i>Language limitation</i> | <i>Time limitation</i> | <i>Hand/Reference search</i> | <i>Grey literature</i> | <i>Number of databases used</i> | <i>Number of Included studies</i> | <i>Risk of Bias Tool Used/ quality assessment</i> | <i>Meta-analysis</i> |
| 1                                            | Anatomical and functional characteristics A6 | Tannure et al (7)                         | 21                      | 2012        | Cleft Palate Craniofac J              | N                          | Y                      | Y                            | N                      | 4                               | 6                                 | Cochrane Collaboration's tool                     | Y                    |
| 2                                            | Anatomical and functional characteristics A6 | Khalaf et al (4)                          | 22                      | 2014        | Journal of Orthodontics               | N                          | Y                      | Y                            | Y                      | 2                               | 61                                | STROBE                                            | Y                    |
| 3                                            | Embryologic development A3                   | Allagh et al (8)                          | 23                      | 2015        | PLoS One                              | Y                          | N                      | Y                            | N                      | 2                               | 19                                | STROBE                                            | Y                    |
| 4                                            | N/A                                          | Wang et al (11)                           | 24                      | 2017        | Birth Defects Research                | N                          | Y                      | N                            | N                      | 4                               | 41                                | Previous studies                                  | Y                    |
| 5                                            | Etiopathogenesis A2                          | Chen et al (6)                            | 25                      | 2018        | Arch. Gynecol. Obstet.                | Y                          | N                      | Y                            | Y                      | 4                               | 34                                | Newcastle–Ottawa Scale                            | Y                    |
| 6                                            | N/A                                          | Haseli et al (5)                          | 26                      | 2018        | J Mazandaran Univ Med Sci             | Y                          | N                      | Y                            | Y                      | 5                               | 17                                | ROBINS-I                                          | Y                    |
| 7                                            | Genetics A4                                  | Pereira et al (6)                         | 27                      | 2019        | Scientific Reports                    | Y                          | Y                      | N                            | Y                      | 2                               | 13                                | STROBE                                            | N                    |
| 8                                            | N/A                                          | Salari et al (6)                          | 28                      | 2021        | J. Stomatol. Oral Maxillofac. Surg.   | Y                          | Y                      | Y                            | Y                      | 4                               | 69                                | STROBE                                            | Y                    |
| Sub-domain I - Etiopathogenesis (A2)         |                                              |                                           |                         |             |                                       |                            |                        |                              |                        |                                 |                                   |                                                   |                      |
| <i>N os.</i>                                 | <i>Subdomain II and code</i>                 | <i>Author and number of reviewers (n)</i> | <i>Reference number</i> | <i>Year</i> | <i>Journal</i>                        | <i>Language limit</i>      | <i>Time limitation</i> | <i>Hand/Reference search</i> | <i>Grey literature</i> | <i>Number of databases used</i> | <i>Number of Included studies</i> | <i>Risk of Bias Tool Used/ quality assessment</i> | <i>Meta-analysis</i> |
| 9                                            | Embryologic development A3                   | Chi et al (4)                             | 29                      | 2010        | J Am Acad Dermatol., Cochrane library | N                          | N                      | Y                            | Y                      | 4                               | 7                                 | Newcastle–Ottawa Scale                            | N                    |
| 10                                           | Embryologic development A3                   | Dreier et al (3)                          | 30                      | 2013        | PEDIATRICS                            | N                          | N                      | Y                            | N                      | 3                               | 46                                | Newcastle–Ottawa Scale                            | Y                    |
| 11                                           | Embryologic development A3                   | Molina-Solana et al (5)                   | 31                      | 2013        | Int. J. Oral Maxillofac. Surg.        | N                          | N                      | Y                            | Y                      | 5                               | 28                                | Previous study                                    | Y                    |

**Annexure 4:** Detailed characteristics of included studies as Domain, Subdomain I and code, Subdomain II and code ( refer to Figure 1 and Table 1 for subdomains and codes), Author and number of reviewers, reference number (as numbered in the reference list of paper), year, journal of publication, language limits, Time limitation, hand/reference searching, grey literature search, number of databases used, number of included studies, Risk of bias tool used for quality assessment and meta-analysis. (Abbreviation Nos.= Numbers, Y= Present, N= Not present). Color codes have been done for different Domains and subdomains (I and II) are as presented in Table 1.

|    |                                   |                      |    |      |                              |   |   |         |   |   |    |                                                           |   |
|----|-----------------------------------|----------------------|----|------|------------------------------|---|---|---------|---|---|----|-----------------------------------------------------------|---|
| 12 | Risk assessment and prediction F2 | Popoff et al (6)     | 32 | 2013 | Dentistry 3000               | Y | N | Y       | N | 3 | 8  | STROBE                                                    | N |
| 13 | Embryologic development A3        | Bell et al (6)       | 33 | 2014 | Paediatr. Perinat. Epidemiol | N | N | Y       | N | 3 | 33 | Newcastle–Ottawa Scale                                    | Y |
| 14 | Embryologic development A3        | Luteijn et al (3)    | 34 | 2014 | Human Reproduction           | Y | N | Y       | N | 2 | 46 | Newcastle–Ottawa scale                                    | Y |
| 15 | Genetics A4                       | Sabbagh et al (5)    | 35 | 2014 | Cleft Palate Craniofac J     | N | N | Y       | Y | 2 | 16 | Newcastle–Ottawa Scale                                    | Y |
| 16 | Embryologic development A3        | De-Regil et al (4)   | 36 | 2015 | The Cochrane Library         | N | N | Y       | Y | 4 | 30 | Cochrane Collaboration’s tool                             | Y |
| 17 | Embryologic development A3        | Izedonmwen et al (3) | 37 | 2015 | J Oral Maxillofac Res        | Y | Y | Y       | Y | 2 | 6  | Critical Appraisal Skills Programme methodology checklist | Y |
| 18 | Embryologic development A3        | Sabbagh et al (6)    | 38 | 2015 | PLoS ONE                     | N | Y | Y       | Y | 2 | 15 | Newcastle–Ottawa Scale                                    | Y |
| 19 | Embryologic development A3        | Tanoshima et al (6)  | 39 | 2015 | Clin. Pharm. Therap.         | N | N | Y       | Y | 3 | 59 | Newcastle–Ottawa scale                                    | Y |
| 20 | Embryologic development A3        | Rao et al (4)        | 40 | 2016 | J Oral Maxillofac Res        | Y | Y | Y       | Y | 2 | 8  | Previous studies                                          | Y |
| 21 | Embryologic development A3        | Veroniki et al (15)  | 41 | 2017 | BMC Medicine                 | N | N | Y       | Y | 3 | 93 | Cochrane, Newcastle-Ottawa Scale                          | Y |
| 22 | Embryologic development A3        | Liang et al (7)      | 42 | 2018 | Oncotarget                   | N | N | Y       | N | 7 | 16 | Newcastle–Ottawa Scale                                    | Y |
| 23 | Embryologic development A3        | Jayarajan et al (3)  | 43 | 2019 | Indian J PlastSurg           | N | N | N       | Y | 4 | 4  | Cochrane Collaboration’s tool                             | N |
| 24 | Embryologic development A3        | Yin et al (4)        | 44 | 2019 | Br J Oral Maxillofac Surg.   | N | N | Y       | Y | 3 | 12 | Newcastle–Ottawa Scale                                    | Y |
| 25 | Embryologic development A3        | Picot et al (6)      | 45 | 2020 | Birth Defects Research.      | N | N | unclear | Y | 2 | 12 | ROBINS-I                                                  | Y |
| 26 | Embryologic development A3        | Fell et al (6)       | 46 | 2021 | Cleft Palate Craniofac J     | N | N | Y       | N | 4 | 44 | Newcastle–Ottawa scale                                    | Y |

**Annexure 4:** Detailed characteristics of included studies as Domain, Subdomain I and code, Subdomain II and code ( refer to Figure 1 and Table 1 for subdomains and codes), Author and number of reviewers, reference number (as numbered in the reference list of paper), year, journal of publication, language limits, Time limitation, hand/reference searching, grey literature search, number of databases used, number of included studies, Risk of bias tool used for quality assessment and meta-analysis. (Abbreviation Nos.= Numbers, Y= Present, N= Not present). Color codes have been done for different Domains and subdomains (I and II) are as presented in Table 1.

|                                                                    |                                                                               |                                           |                           |             |                                     |                       |                        |                               |                        |                                 |                                   |                                                   |                      |
|--------------------------------------------------------------------|-------------------------------------------------------------------------------|-------------------------------------------|---------------------------|-------------|-------------------------------------|-----------------------|------------------------|-------------------------------|------------------------|---------------------------------|-----------------------------------|---------------------------------------------------|----------------------|
| 27                                                                 | Health economics E4                                                           | Kruppa et al (5)                          | 47                        | 2021        | Cleft Palate Craniofac J            | Y                     | Y                      | Y                             | N                      | 4                               | 17                                | Newcastle-Ottawa Scale                            | N                    |
| 28                                                                 | Embryologic development A3                                                    | Shi et al (6)                             | 48                        | 2021        | Cleft Palate Craniofac J            | Y                     | N                      | Y                             | N                      | 2                               | 13                                | Newcastle Ottawa Scale                            | Y                    |
| 29                                                                 | Psychosocial aspects, perceptions and quality of life of patients with CLP E1 | Tran et al (7)                            | 49                        | 2022        | Cleft Palate Craniofac J            | Y                     | N                      | Y                             | N                      | 5                               | 12                                | Newcastle-Ottawa scale                            | Y                    |
| <b>Sub-domain I - Genetics A4</b>                                  |                                                                               |                                           |                           |             |                                     |                       |                        |                               |                        |                                 |                                   |                                                   |                      |
| <i>N os.</i>                                                       | <i>Subdomain II and code</i>                                                  | <i>Author and number of reviewers (n)</i> | <i>Refere nce numbe r</i> | <i>Year</i> | <i>Journal</i>                      | <i>Language limit</i> | <i>Time limitation</i> | <i>Hand/ Reference search</i> | <i>Grey literature</i> | <i>Number of databases used</i> | <i>Number of Included studies</i> | <i>Risk of Bias Tool Used/ quality assessment</i> | <i>Meta-analysis</i> |
| 30                                                                 | Risk assessment and prediction F2                                             | Machado et al (6)                         | 50                        | 2018        | Birth Defects Res                   | N                     | N                      | Y                             | Y                      | 5                               | 11                                | MAStARI assessment                                | Y                    |
| 31                                                                 | Etiopathogenesis A2                                                           | Imani et al (4)                           | 51                        | 2019        | International orthodontics          | N                     | N                      | Y                             | N                      | 4                               | 4                                 | Newcastle–Ottawa scale                            | Y                    |
| 32                                                                 | Etiopathogenesis A2                                                           | Imani et al (4)                           | 52                        | 2019        | Int. J. Environ. Res. Public Health | N                     | N                      | Y                             | N                      | 5                               | 10                                | Newcastle–Ottawa scale                            | Y                    |
| 33                                                                 | Etiopathogenesis A2                                                           | Imani et al (5)                           | 53                        | 2019        | International Orthodontics          | N                     | N                      | Y                             | N                      | 4                               | 4                                 | Newcastle–Ottawa scale                            | Y                    |
| 34                                                                 | Risk assessment and prediction F2                                             | Mendes et al (7)                          | 54                        | 2019        | J Oral Pathol Med.                  | N                     | N                      | Y                             | Y                      | 4                               | 4                                 | QUADAS-2                                          | N                    |
| 35                                                                 | Etiopathogenesis A2                                                           | Imani et al (7)                           | 55                        | 2021        | Life                                | N                     | N                      | Y                             | N                      | 4                               | 12                                | Newcastle–Ottawa scale                            | Y                    |
| <b>Sub-domain I - Anatomical and functional characteristics A6</b> |                                                                               |                                           |                           |             |                                     |                       |                        |                               |                        |                                 |                                   |                                                   |                      |
| <i>N os.</i>                                                       | <i>Subdomain II and code</i>                                                  | <i>Author and number of reviewers (n)</i> | <i>Refere nce numbe r</i> | <i>Year</i> | <i>Journal</i>                      | <i>Language limit</i> | <i>Time limitation</i> | <i>Hand/ Reference search</i> | <i>Grey literature</i> | <i>Number of databases used</i> | <i>Number of Included studies</i> | <i>Risk of Bias Tool Used/ quality assessment</i> | <i>Meta-analysis</i> |
| 36                                                                 | N/A                                                                           | Antonarakis et al (3)                     | 56                        | 2013        | Clin Oral Invest                    | N                     | N                      | N                             | Y                      | 5                               | 4                                 | Previous studies                                  | Y                    |

**Annexure 4:** Detailed characteristics of included studies as Domain, Subdomain I and code, Subdomain II and code ( refer to Figure 1 and Table 1 for subdomains and codes), Author and number of reviewers, reference number (as numbered in the reference list of paper), year, journal of publication, language limits, Time limitation, hand/reference searching, grey literature search, number of databases used, number of included studies, Risk of bias tool used for quality assessment and meta-analysis. (Abbreviation Nos.= Numbers, Y= Present, N= Not present). Color codes have been done for different Domains and subdomains (I and II) are as presented in Table 1.

[illegible]

**Annexure 4:** Detailed characteristics of included studies as Domain, Subdomain I and code, Subdomain II and code ( refer to Figure 1 and Table 1 for subdomains and codes), Author and number of reviewers, reference number (as numbered in the reference list of paper), year, journal of publication, language limits, Time limitation, hand/reference searching, grey literature search, number of databases used, number of included studies, Risk of bias tool used for quality assessment and meta-analysis. (Abbreviation Nos.= Numbers, Y= Present, N= Not present). Color codes have been done for different Domains and subdomains (I and II) are as presented in Table 1.

| <b>Sub-domain I - Indices of CLP B2</b>                                            |                                                       |                                           |                           |             |                                |                       |                        |                               |                        |                                 |                                   |                                                   |                      |
|------------------------------------------------------------------------------------|-------------------------------------------------------|-------------------------------------------|---------------------------|-------------|--------------------------------|-----------------------|------------------------|-------------------------------|------------------------|---------------------------------|-----------------------------------|---------------------------------------------------|----------------------|
| <i>N os.</i>                                                                       | <i>Subdomain II and code</i>                          | <i>Author and number of reviewers (n)</i> | <i>Refere nce numbe r</i> | <i>Year</i> | <i>Journal</i>                 | <i>Language limit</i> | <i>Time limitation</i> | <i>Hand/ Reference search</i> | <i>Grey literature</i> | <i>Number of databases used</i> | <i>Number of Included studies</i> | <i>Risk of Bias Tool Used/ quality assessment</i> | <i>Meta-analysis</i> |
| 47                                                                                 | Outcome assessment C15                                | Altalibi et al (5)                        | 67                        | 2013        | Eur J Orthod.                  | N                     | N                      | Y                             | Y                      | 7                               | 13                                | QUADAS methodologic assessment tool               | N                    |
| 48                                                                                 | Treatment planning and prediction C1                  | Buj-Acosta et al (5)                      | 68                        | 2017        | PLoS ONE                       | N                     | N                      | Y                             | Y                      | 4                               | 3                                 | QUADAS tool                                       | N                    |
| <b>Sub-domain I - Prenatal diagnosis B3</b>                                        |                                                       |                                           |                           |             |                                |                       |                        |                               |                        |                                 |                                   |                                                   |                      |
| <i>N os.</i>                                                                       | <i>Subdomain II and code</i>                          | <i>Author and number of reviewers (n)</i> | <i>Refere nce numbe r</i> | <i>Year</i> | <i>Journal</i>                 | <i>Language limit</i> | <i>Time limitation</i> | <i>Hand/ Reference search</i> | <i>Grey literature</i> | <i>Number of databases used</i> | <i>Number of Included studies</i> | <i>Risk of Bias Tool Used/ quality assessment</i> | <i>Meta-analysis</i> |
| 49                                                                                 | Conventional radiography and 2D imaging B5            | Lai et al (5)                             | 69                        | 2021        | J Ultrasound Med               | N                     | Y                      | Y                             | N                      | 3                               | 7                                 | QUADAS-2                                          | Y                    |
| <b>Sub-domain I - Advanced radiography including 3D imaging and 3D printing B6</b> |                                                       |                                           |                           |             |                                |                       |                        |                               |                        |                                 |                                   |                                                   |                      |
| <i>N os.</i>                                                                       | <i>Subdomain II and code</i>                          | <i>Author and number of reviewers (n)</i> | <i>Refere nce numbe r</i> | <i>Year</i> | <i>Journal</i>                 | <i>Language limit</i> | <i>Time limitation</i> | <i>Hand/ Reference search</i> | <i>Grey literature</i> | <i>Number of databases used</i> | <i>Number of Included studies</i> | <i>Risk of Bias Tool Used/ quality assessment</i> | <i>Meta-analysis</i> |
| 50                                                                                 | Clinical practice guidelines and Core outcome sets G1 | van Vlijmen et al (8)                     | 70                        | 2012        | JADA                           | N                     | N                      | Y                             | N                      | 5                               | 50                                | Previous studies                                  | N                    |
| 51                                                                                 | Anatomical and functional characteristics A6          | Thierens et al (4)                        | 71                        | 2018        | J Oral MaxillofacSurg          | Y                     | N                      | Y                             | N                      | 4                               | 15                                | MINORS                                            | N                    |
| 52                                                                                 | Anatomical and functional characteristics A6          | Thierens et al (4)                        | 72                        | 2018        | Int. J. Oral Maxillofac. Surg. | Y                     | N                      | Y                             | N                      | 4                               | 33                                | MINORS                                            | N                    |
| <b>Domain. C. THERAPEUTIC</b>                                                      |                                                       |                                           |                           |             |                                |                       |                        |                               |                        |                                 |                                   |                                                   |                      |
| <b>Sub-domain I -. Feeding and nutrition in patients C2</b>                        |                                                       |                                           |                           |             |                                |                       |                        |                               |                        |                                 |                                   |                                                   |                      |
| <i>N os.</i>                                                                       | <i>Subdomain II and code</i>                          | <i>Author and number of reviewers (n)</i> | <i>Refere nce</i>         | <i>Year</i> | <i>Journal</i>                 | <i>Language Limit</i> | <i>Time limitation</i> | <i>Hand/ Reference search</i> | <i>Grey literature</i> | <i>Number of databases used</i> | <i>Number of</i>                  | <i>Risk of Bias Tool Used/ quality assessment</i> | <i>Meta-analysis</i> |

**Annexure 4:** Detailed characteristics of included studies as Domain, Subdomain I and code, Subdomain II and code ( refer to Figure 1 and Table 1 for subdomains and codes), Author and number of reviewers, reference number (as numbered in the reference list of paper), year, journal of publication, language limits, Time limitation, hand/reference searching, grey literature search, number of databases used, number of included studies, Risk of bias tool used for quality assessment and meta-analysis. (Abbreviation Nos.= Numbers, Y= Present, N= Not present). Color codes have been done for different Domains and subdomains (I and II) are as presented in Table 1.

|                                                                                                    |                                                              |                                           |                         |             |                                                          |                       |                        |                               |                        |                                 |                                   |                                                                                                                                        |                      |
|----------------------------------------------------------------------------------------------------|--------------------------------------------------------------|-------------------------------------------|-------------------------|-------------|----------------------------------------------------------|-----------------------|------------------------|-------------------------------|------------------------|---------------------------------|-----------------------------------|----------------------------------------------------------------------------------------------------------------------------------------|----------------------|
|                                                                                                    |                                                              |                                           | <i>number</i>           |             |                                                          |                       |                        |                               |                        |                                 | <i>Included studies</i>           |                                                                                                                                        |                      |
| 53                                                                                                 | Clinical practice guidelines and Core outcome sets G1        | Mei et al (3)                             | 73                      | 2009        | Evidence-Based Communication Assessment and Intervention | Y                     | N                      | N                             | N                      | 5                               | 14                                | Cochrane Collaboration's tool                                                                                                          | N                    |
| <b>Sub-domain I -. Presurgical Infant Orthopaedics and Naso-Alveolar Moulding C3</b>               |                                                              |                                           |                         |             |                                                          |                       |                        |                               |                        |                                 |                                   |                                                                                                                                        |                      |
| <i>N os.</i>                                                                                       | <i>Subdomain II and code</i>                                 | <i>Author and number of reviewers (n)</i> | <i>Reference number</i> | <i>Year</i> | <i>Journal</i>                                           | <i>Language limit</i> | <i>Time limitation</i> | <i>Hand/ Reference search</i> | <i>Grey literature</i> | <i>Number of databases used</i> | <i>Number of Included studies</i> | <i>Risk of Bias Tool Used/ quality assessment</i>                                                                                      | <i>Meta-analysis</i> |
| 54                                                                                                 | Cleft Lip repair C8                                          | Heijden et al (7)                         | 74                      | 2012        | Plast. Reconstr. Surg.                                   | Y                     | N                      | Y                             | N                      | 3                               | 12                                | GRADE                                                                                                                                  | N                    |
| 55                                                                                                 | Outcome assessment C15                                       | Namdar et al (5)                          | 75                      | 2020        | Journal of Pediatrics Review                             | Y                     | N                      | Y                             | N                      | 3                               | 22                                | Cochrane Collaboration's tool                                                                                                          | N                    |
| 56                                                                                                 | Outcome assessment C15                                       | Padovano et al (5)                        | 76                      | 2021        | Cleft Palate Craniofac J                                 | Y                     | N                      | N                             | Y                      | 5                               | 12                                | modified Newcastle-Ottawa scale, Agency for Healthcare Research and Quality (AHRQ) standards, Cochrane collaboration risk of bias tool | Y                    |
| <b>Sub-domain I - Orthodontic and Surgical Perspectives of Secondary Alveolar Bone Grafting C5</b> |                                                              |                                           |                         |             |                                                          |                       |                        |                               |                        |                                 |                                   |                                                                                                                                        |                      |
| <i>N os.</i>                                                                                       | <i>Subdomain II and code</i>                                 | <i>Author and number of reviewers (n)</i> | <i>Reference number</i> | <i>Year</i> | <i>Journal</i>                                           | <i>Language limit</i> | <i>Time limitation</i> | <i>Hand/ Reference search</i> | <i>Grey literature</i> | <i>Number of databases used</i> | <i>Number of Included studies</i> | <i>Risk of Bias Tool Used/ quality assessment</i>                                                                                      | <i>Meta-analysis</i> |
| 57                                                                                                 | Advanced radiography including 3D imaging and 3D printing B6 | Mulder et al (5)                          | 77                      | 2019        | DentomaxillofacRadiol                                    | Y                     | N                      | Y                             | Y                      | 3                               | 38                                | MINORS                                                                                                                                 | N                    |

**Annexure 4:** Detailed characteristics of included studies as Domain, Subdomain I and code, Subdomain II and code ( refer to Figure 1 and Table 1 for subdomains and codes), Author and number of reviewers, reference number (as numbered in the reference list of paper), year, journal of publication, language limits, Time limitation, hand/reference searching, grey literature search, number of databases used, number of included studies, Risk of bias tool used for quality assessment and meta-analysis. (Abbreviation Nos.= Numbers, Y= Present, N= Not present). Color codes have been done for different Domains and subdomains (I and II) are as presented in Table 1.

|                                                                                                 |                                                              |                                    |                    |      |                                  |                |                 |                        |                 |                          |                            |                                                                              |               |
|-------------------------------------------------------------------------------------------------|--------------------------------------------------------------|------------------------------------|--------------------|------|----------------------------------|----------------|-----------------|------------------------|-----------------|--------------------------|----------------------------|------------------------------------------------------------------------------|---------------|
| 58                                                                                              | Advanced radiography including 3D imaging and 3D printing B6 | Scalzone et al (6)                 | 78                 | 2019 | Progress in Orthodontics         | N              | Y               | Y                      | N               | 4                        | 4                          | GRADE                                                                        | Y             |
| 59                                                                                              | Alveolar bone grafting and graft materials C10               | Pinheiro et al (5)                 | 79                 | 2020 | OrthodCraniofac Res.             | N              | N               | Y                      | Y               | 5                        | 19                         | MINORS                                                                       | N             |
| 60                                                                                              | Outcome assessment C15                                       | Yu et al (3)                       | 80                 | 2020 | Oral And Maxillofacial Radiology | N              | Y               | Y                      | Y               | 3                        | 11                         | MINORS                                                                       | N             |
| 61                                                                                              | Alveolar bone grafting and graft materials C10               | Jahanbin et al (5)                 | 81                 | 2021 | J Craniofac Surg.                | N              | N               | Y                      | Y               | 5                        | 8                          | Newcastle-Ottawa evaluation (NRCT) and Cochrane Collaboration's tool for RCT | Y             |
| 62                                                                                              | Outcome assessment C15                                       | Lacerda-Santos et al (8)           | 82                 | 2021 | Eur. J. Dent.                    | N              | N               | Y                      | Y               | 5                        | 4                          | ROBINS-I                                                                     | N             |
| Sub-domain I - Conventional orthodontics C6                                                     |                                                              |                                    |                    |      |                                  |                |                 |                        |                 |                          |                            |                                                                              |               |
| N os.                                                                                           | Subdomain II and code                                        | Author and number of reviewers (n) | Refere nce numbe r | Year | Journal                          | Language limit | Time limitation | Hand/ Reference search | Grey literature | Number of databases used | Number of Included studies | Risk of Bias Tool Used/ quality assessment                                   | Meta-analysis |
| 63                                                                                              | Outcome assessment C15                                       | Palikaraki et al (7)               | 83                 | 2020 | Eur J Orthod.                    | Y              | N               | Y                      | Y               | 5                        | 9                          | ROBINS-I                                                                     | Y             |
| 64                                                                                              | Outcome assessment C15                                       | Shafaei et al (4)                  | 84                 | 2020 | Iran J Ortho.                    | N              | N               | Y                      | Y               | 3                        | 9                          | Newcastle-Ottawa Scale                                                       | Y             |
| Sub-domain I - Cleft Lip repair C8                                                              |                                                              |                                    |                    |      |                                  |                |                 |                        |                 |                          |                            |                                                                              |               |
| N os.                                                                                           | Subdomain II and code                                        | Author and number of reviewers (n) | Refere nce numbe r | Year | Journal                          | Language limit | Time limitation | Hand/ Reference search | Grey literature | Number of databases used | Number of Included studies | Risk of Bias Tool Used/ quality assessment                                   | Meta-analysis |
| 65                                                                                              | Effects/Complications of PSIO and PNAM D2                    | Thierens et al (4)                 | 85                 | 2016 | Oral Dis.                        | Y              | N               | Y                      | N               | 4                        | 15                         | MINORS                                                                       | N             |
| 66                                                                                              | Outcome assessment C15                                       | Jayarajan et al (3)                | 86                 | 2018 | Cleft Palate Craniofac J         | N              | N               | N                      | N               | 4                        | 16                         | Cochrane Collaboration's tool                                                | N             |
| Sub-domain I - Cleft alveolus, sub-mucous cleft and all types of cleft palate closure/repair C9 |                                                              |                                    |                    |      |                                  |                |                 |                        |                 |                          |                            |                                                                              |               |

**Annexure 4:** Detailed characteristics of included studies as Domain, Subdomain I and code, Subdomain II and code ( refer to Figure 1 and Table 1 for subdomains and codes), Author and number of reviewers, reference number (as numbered in the reference list of paper), year, journal of publication, language limits, Time limitation, hand/reference searching, grey literature search, number of databases used, number of included studies, Risk of bias tool used for quality assessment and meta-analysis. (Abbreviation Nos.= Numbers, Y= Present, N= Not present). Color codes have been done for different Domains and subdomains (I and II) are as presented in Table 1.

| <i>N os.</i>                                                         | <i>Subdomain II and code</i>                                                 | <i>Author and number of reviewers (n)</i> | <i>Reference number</i> | <i>Year</i> | <i>Journal</i>                 | <i>Language limit</i> | <i>Time limitation</i> | <i>Hand/ Reference search</i> | <i>Grey literature</i> | <i>Number of databases used</i> | <i>Number of Included studies</i> | <i>Risk of Bias Tool Used/ quality assessment</i>     | <i>Meta-analysis</i> |
|----------------------------------------------------------------------|------------------------------------------------------------------------------|-------------------------------------------|-------------------------|-------------|--------------------------------|-----------------------|------------------------|-------------------------------|------------------------|---------------------------------|-----------------------------------|-------------------------------------------------------|----------------------|
| 67                                                                   | Effects/Complications of Surgical treatment and/or alveolar bone grafting D4 | Salgado et al (6)                         | 87                      | 2019        | J Craniomaxillofac Surg        | N                     | N                      | Y                             | Y                      | 5                               | 5                                 | Previous study                                        | N                    |
| <b>Sub-domain I - Alveolar bone grafting and graft materials C10</b> |                                                                              |                                           |                         |             |                                |                       |                        |                               |                        |                                 |                                   |                                                       |                      |
| <i>N os.</i>                                                         | <i>Subdomain II and code</i>                                                 | <i>Author and number of reviewers (n)</i> | <i>Reference number</i> | <i>Year</i> | <i>Journal</i>                 | <i>Language limit</i> | <i>Time limitation</i> | <i>Hand/ Reference search</i> | <i>Grey literature</i> | <i>Number of databases used</i> | <i>Number of Included studies</i> | <i>Risk of Bias Tool Used/ quality assessment</i>     | <i>Meta-analysis</i> |
| 68                                                                   | Orthodontic and Surgical Perspectives of Secondary Alveolar Bone Grafting C5 | Guo et al (9)                             | 88                      | 2011        | The Cochrane Library           | N                     | N                      | Y                             | Y                      | 4                               | 2                                 | Cochrane Collaboration's tool and ROBINS-I guidelines | Y                    |
| 69                                                                   | Orthodontic and Surgical Perspectives of Secondary Alveolar Bone Grafting C5 | Canellas et al (5)                        | 89                      | 2018        | Int. J. Oral Maxillofac. Surg. | N                     | N                      | Y                             | Y                      | 5                               | 30                                | Cochrane Collaboration's tool                         | Y                    |
| 70                                                                   | Orthodontic and Surgical Perspectives of Secondary Alveolar Bone Grafting C5 | da Rosa et al (5)                         | 90                      | 2018        | Calcif Tissue Int.             | Y                     | N                      | Y                             | N                      | 6                               | 10                                | Cochrane Collaboration's tool                         | Y                    |
| 71                                                                   | Advanced radiography including 3D imaging and 3D printing B6                 | Kamal et al (8)                           | 91                      | 2018        | Br. J. Oral Maxillofac. Surg.  | N                     | N                      | Y                             | Y                      | 4                               | 32                                | MOOSE, STROBE                                         | Y                    |
| 72                                                                   | Effects/Complications of Surgical treatment and/or alveolar bone grafting D4 | Simpson et al (5)                         | 92                      | 2018        | Cleft Palate Craniofac J       | Y                     | N                      | Y                             | N                      | 2                               | 12                                | MINORS                                                | Y                    |



**Annexure 4:** Detailed characteristics of included studies as Domain, Subdomain I and code, Subdomain II and code ( refer to Figure 1 and Table 1 for subdomains and codes), Author and number of reviewers, reference number (as numbered in the reference list of paper), year, journal of publication, language limits, Time limitation, hand/reference searching, grey literature search, number of databases used, number of included studies, Risk of bias tool used for quality assessment and meta-analysis. (Abbreviation Nos.= Numbers, Y= Present, N= Not present). Color codes have been done for different Domains and subdomains (I and II) are as presented in Table 1.

|    |                                                                                 |                          |     |      |                                 |   |   |         |         |   |    |                                                    |   |
|----|---------------------------------------------------------------------------------|--------------------------|-----|------|---------------------------------|---|---|---------|---------|---|----|----------------------------------------------------|---|
| 73 | Comprehensive Interdisciplinary care C13                                        | Sales et al (4)          | 93  | 2019 | Int. J. Oral Maxillofac. Surg.  | N | N | Y       | Y       | 3 | 11 | Newcastle-Ottawa Scale                             | N |
| 74 | Cleft alveolus, submucous cleft and all types of cleft palate closure/repair C9 | Uribe et al (5)          | 94  | 2019 | Cleft Palate Craniofac J        | Y | N | N       | N       | 6 | 5  | Cochrane Collaboration's tool                      | N |
| 75 | Orthodontic and Surgical Perspectives of Secondary Alveolar Bone Grafting C5    | Francisco et al (3)      | 95  | 2020 | Materials                       | Y | N | Y       | N       | 4 | 9  | Cochrane Risk of Bias tool and ROBINS-I guidelines | N |
| 76 | Presurgical Infant Orthopaedics and Naso-Alveolar Moulding C3                   | Ma et al (4)             | 96  | 2020 | J Stomatol Oral Maxillofac Surg | Y | N | unclear | unclear | 5 | 11 | MINORS                                             | N |
| 77 | Outcome assessment C15                                                          | Osorio et al (5)         | 97  | 2020 | Heliyon                         | N | N | Y       | N       | 3 | 15 | Cochrane Collaboration's tool                      | N |
| 78 | Outcome assessment C15                                                          | Xiao et al (4)           | 98  | 2020 | J PlastReconstrAesthet          | N | N | Y       | N       | 4 | 9  | Newcastle–Ottawa Scale                             | Y |
| 79 | Orthodontic and Surgical Perspectives of Secondary Alveolar Bone Grafting C5    | Alkaabi et al (7)        | 99  | 2021 | J PlastReconstrAesthetSurg      | Y | N | N       | Y       | 4 | 15 | Jadad scale and the Delphi list                    | Y |
| 80 | Outcome assessment C15                                                          | Carbullido et al (9)     | 100 | 2021 | Cleft Palate Craniofac J        | Y | N | N       | N       | 3 | 32 | Newcastle–Ottawa Scale                             | N |
| 81 | Orthodontic and Surgical Perspectives of Secondary Alveolar Bone Grafting C5    | Chetpakdeechit et al (4) | 101 | 2021 | Cleft Palate Craniofac J        | N | N | N       | N       | 4 | 23 | ROBINS-I                                           | N |

**Annexure 4:** Detailed characteristics of included studies as Domain, Subdomain I and code, Subdomain II and code ( refer to Figure 1 and Table 1 for subdomains and codes), Author and number of reviewers, reference number (as numbered in the reference list of paper), year, journal of publication, language limits, Time limitation, hand/reference searching, grey literature search, number of databases used, number of included studies, Risk of bias tool used for quality assessment and meta-analysis. (Abbreviation Nos.= Numbers, Y= Present, N= Not present). Color codes have been done for different Domains and subdomains (I and II) are as presented in Table 1.

|                                                                                                                                             |                                                                                 |                                    |                    |      |                                |                |                 |                        |                 |                          |                            |                                            |               |
|---------------------------------------------------------------------------------------------------------------------------------------------|---------------------------------------------------------------------------------|------------------------------------|--------------------|------|--------------------------------|----------------|-----------------|------------------------|-----------------|--------------------------|----------------------------|--------------------------------------------|---------------|
| 82                                                                                                                                          | Orthodontic and Surgical Perspectives of Secondary Alveolar Bone Grafting C5    | Deshpande et al (3)                | 102                | 2021 | Int J Dentistry Oral Sci.      | Y              | N               | Y                      | Y               | 2                        | 3                          | CONSORT guidelines                         | N             |
| Sub-domain I - Orthognathic and osteogenic distraction surgical orthodontics C11                                                            |                                                                                 |                                    |                    |      |                                |                |                 |                        |                 |                          |                            |                                            |               |
| N os.                                                                                                                                       | Subdomain II and code                                                           | Author and number of reviewers (n) | Refere nce numbe r | Year | Journal                        | Language limit | Time limitation | Hand/ Reference search | Grey literature | Number of databases used | Number of Included studies | Risk of Bias Tool Used/ quality assessment | Meta-analysis |
| 83                                                                                                                                          | Outcome assessment C15                                                          | Saltaji et al (5)                  | 103                | 2012 | J Oral MaxillofacSurg          | N              | N               | Y                      | Y               | 5                        | 10                         | Previous study                             | N             |
| 84                                                                                                                                          | Outcome assessment C15                                                          | Saltaji et al (5)                  | 104                | 2012 | Angle Orthod.                  | N              | N               | Y                      | Y               | 5                        | 13                         | Previous study                             | N             |
| 85                                                                                                                                          | Outcome assessment C15                                                          | Viwattanatipa et al (3)            | 105                | 2015 | Orthodontic waves              | Y              | Y               | N                      | Y               | 5                        | 12                         | Previous study                             | Y             |
| 86                                                                                                                                          | Outcome assessment C15                                                          | Jiang et al (8)                    | 106                | 2020 | Int. J. Oral Maxillofac. Surg. | Y              | N               | N                      | N               | 4                        | 141                        | MINORS                                     | Y             |
| Sub-domain I - Other surgical aspects of cleft lip and palate including revisions, scar management, post-operative pain and anaesthesia C12 |                                                                                 |                                    |                    |      |                                |                |                 |                        |                 |                          |                            |                                            |               |
| N os.                                                                                                                                       | Subdomain II and code                                                           | Author and number of reviewers (n) | Refere nce numbe r | Year | Journal                        | Language limit | Time limitation | Hand/ Reference search | Grey literature | Number of databases used | Number of Included studies | Risk of Bias Tool Used/ quality assessment | Meta-analysis |
| 87                                                                                                                                          | Effects/Complications of Surgical treatment and/or alveolar bone grafting D4    | Suresh et al (4)                   | 107                | 2014 | British Journal of Anaesthesia | N              | N               | Y                      | N               | 3                        | 73                         | modified Jadad five-point quality scale    | N             |
| 88                                                                                                                                          | Cleft Lip repair C8                                                             | Feriani et al (4)                  | 108                | 2016 | The Cochrane Library           | N              | N               | Y                      | Y               | 3                        | 8                          | Cochrane Collaboration's tool              | Y             |
| 89                                                                                                                                          | Effects/Complications of Surgical treatment and/or alveolar bone grafting D4    | Kendall et al (5)                  | 109                | 2018 | Local Reg. Anesth.             | N              | Y               | Y                      | Y               | 2                        | 40                         | Modified Jadad score                       | N             |
| 90                                                                                                                                          | Alveolar bone grafting and graft materials C10                                  | Tache and Mommaerts (2)            | 110                | 2019 | Int. J. Oral Maxillofac. Surg. | Y              | N               | Y                      | N               | 4                        | 15                         | MINORS, Cochrane Collaboration's tool      | N             |
| 91                                                                                                                                          | Cleft alveolus, submucous cleft and all types of cleft palate closure/repair C9 | Liu et al (8)                      | 111                | 2021 | BMJ Open                       | Y              | N               | Y                      | Y               | 6                        | 13                         | Cochrane Collaboration's tool              | Y             |
| Sub-domain I - Management of speech and hearing problems C14                                                                                |                                                                                 |                                    |                    |      |                                |                |                 |                        |                 |                          |                            |                                            |               |

**Annexure 4:** Detailed characteristics of included studies as Domain, Subdomain I and code, Subdomain II and code ( refer to Figure 1 and Table 1 for subdomains and codes), Author and number of reviewers, reference number (as numbered in the reference list of paper), year, journal of publication, language limits, Time limitation, hand/reference searching, grey literature search, number of databases used, number of included studies, Risk of bias tool used for quality assessment and meta-analysis. (Abbreviation Nos.= Numbers, Y= Present, N= Not present). Color codes have been done for different Domains and subdomains (I and II) are as presented in Table 1.

| <i>N os.</i>                                 | <i>Subdomain II and code</i>                                                    | <i>Author and number of reviewers (n)</i> | <i>Refere nce numbe r</i> | <i>Year</i> | <i>Journal</i>                                           | <i>Language limit</i> | <i>Time limitation</i> | <i>Hand/ Reference search</i> | <i>Grey literature</i> | <i>Number of databases used</i> | <i>Number of Included studies</i> | <i>Risk of Bias Tool Used/ quality assessment</i>                                                         | <i>Meta-analysis</i> |
|----------------------------------------------|---------------------------------------------------------------------------------|-------------------------------------------|---------------------------|-------------|----------------------------------------------------------|-----------------------|------------------------|-------------------------------|------------------------|---------------------------------|-----------------------------------|-----------------------------------------------------------------------------------------------------------|----------------------|
| 92                                           | Cleft alveolus, submucous cleft and all types of cleft palate closure/repair C9 | Nasser et al (3)                          | 112                       | 2008        | The Cochrane Library                                     | N                     | N                      | Y                             | Y                      | 6                               | 1                                 | Cochrane Collaboration's tool                                                                             | N                    |
| 93                                           | N/A                                                                             | Lee et al (3)                             | 113                       | 2009        | The Cochrane Library                                     | N                     | N                      | Y                             | Y                      | 10                              | 1                                 | Cochrane Collaboration's tool                                                                             | N                    |
| 94                                           | N/A                                                                             | Meinusch and Romonath (2)                 | 114                       | 2011        | Evidence-Based Communication Assessment and Intervention | Y                     | N                      | Y                             | Y                      | 10                              | 5                                 | Cochrane Collaboration's tool                                                                             | N                    |
| 95                                           | N/A                                                                             | Bessell et al (9)                         | 115                       | 2013        | Cleft Palate Craniofac J                                 | N                     | N                      | Y                             | Y                      | 7                               | 17                                | Cochrane Collaboration's tool                                                                             | Y                    |
| 96                                           | Cleft alveolus, submucous cleft and all types of cleft palate closure/repair C9 | Gilleard et al (6)                        | 116                       | 2014        | Cleft Palate Craniofac J                                 | Y                     | N                      | Y                             | Y                      | 9                               | 26                                | Previous studies                                                                                          | N                    |
| 97                                           | Effects/Complications of Surgical treatment and/or alveolar bone grafting D4    | Kuo et al (7)                             | 117                       | 2014        | PEDIATRICS                                               | N                     | N                      | Y                             | Y                      | 3                               | 9                                 | Previous studies                                                                                          | N                    |
| 98                                           | N/A                                                                             | Lane et al (3)                            | 118                       | 2020        | Int J Lang CommunDisord.                                 | Y                     | N                      | N                             | Y                      | 6                               | 7                                 | Physiotherapy Evidence Database quality assessment tool (PEDro-P), single-case experimental design (SCED) | N                    |
| 99                                           | Outcome assessment C15                                                          | Sand et al (3)                            | 119                       | 2022        | J. Speech Lang. Hear. Re.                                | Y                     | N                      | Y                             | Y                      | 6                               | 21                                | ROBINS-I                                                                                                  | Y                    |
| <b>Sub-domain I - Outcome assessment C15</b> |                                                                                 |                                           |                           |             |                                                          |                       |                        |                               |                        |                                 |                                   |                                                                                                           |                      |
| <i>N os.</i>                                 | <i>Subdomain II and code</i>                                                    | <i>Author and number of reviewers (n)</i> | <i>Refere nce numbe r</i> | <i>Year</i> | <i>Journal</i>                                           | <i>Language limit</i> | <i>Time limitation</i> | <i>Hand/ Reference search</i> | <i>Grey literature</i> | <i>Number of databases used</i> | <i>Number of Included studies</i> | <i>Risk of Bias Tool Used/ quality assessment</i>                                                         | <i>Meta-analysis</i> |

**Annexure 4:** Detailed characteristics of included studies as Domain, Subdomain I and code, Subdomain II and code ( refer to Figure 1 and Table 1 for subdomains and codes), Author and number of reviewers, reference number (as numbered in the reference list of paper), year, journal of publication, language limits, Time limitation, hand/reference searching, grey literature search, number of databases used, number of included studies, Risk of bias tool used for quality assessment and meta-analysis. (Abbreviation Nos.= Numbers, Y= Present, N= Not present). Color codes have been done for different Domains and subdomains (I and II) are as presented in Table 1.

[illegible]

**Annexure 4:** Detailed characteristics of included studies as Domain, Subdomain I and code, Subdomain II and code ( refer to Figure 1 and Table 1 for subdomains and codes), Author and number of reviewers, reference number (as numbered in the reference list of paper), year, journal of publication, language limits, Time limitation, hand/reference searching, grey literature search, number of databases used, number of included studies, Risk of bias tool used for quality assessment and meta-analysis. (Abbreviation Nos.= Numbers, Y= Present, N= Not present). Color codes have been done for different Domains and subdomains (I and II) are as presented in Table 1.

| <b>Sub-domain I - Effects/Complications of Surgical treatment and/or alveolar bone grafting D4</b> |                                                                                  |                                           |                         |             |                                |                       |                        |                              |                        |                                 |                                   |                                                                                 |                      |
|----------------------------------------------------------------------------------------------------|----------------------------------------------------------------------------------|-------------------------------------------|-------------------------|-------------|--------------------------------|-----------------------|------------------------|------------------------------|------------------------|---------------------------------|-----------------------------------|---------------------------------------------------------------------------------|----------------------|
| <i>N os.</i>                                                                                       | <i>Subdomain II and code</i>                                                     | <i>Author and number of reviewers (n)</i> | <i>Reference number</i> | <i>Year</i> | <i>Journal</i>                 | <i>Language limit</i> | <i>Time limitation</i> | <i>Hand/Reference search</i> | <i>Grey literature</i> | <i>Number of databases used</i> | <i>Number of Included studies</i> | <i>Risk of Bias Tool Used/ quality assessment</i>                               | <i>Meta-analysis</i> |
| 11<br>1                                                                                            | Cleft alveolus, submucous cleft and all types of cleft palate closure/ repair C9 | Hardwicke et al (3)                       | 131                     | 2014        | Plast. Reconstr. Surg.         | Y                     | Y                      | N                            | N                      | 4                               | 44                                | RCT- Detsky scale, Nnrct- Methodological Index for Nn-randomized Studies        | N                    |
| 11<br>2                                                                                            | Cleft alveolus, submucous cleft and all types of cleft palate closure/repair C9  | Felton et al (5)                          | 132                     | 2017        | AAO-HNSF                       | N                     | N                      | Y                            | Y                      | 3                               | 6                                 | Oxford Centre for Evidence-Based Medicine levels of evidence, Cochrane Handbook | N                    |
| 11<br>3                                                                                            | Cleft alveolus, submucous cleft and all types of cleft palate closure/repair C9  | Kappen et al (4)                          | 133                     | 2018        | J PlastReconstrAesthetSurg     | Y                     | N                      | Y                            | Y                      | 4                               | 17                                | Newcastle–Ottawa scale, Agency for Health Care Research and Quality (AHRQ)      | Y                    |
| 11<br>4                                                                                            | Orthognathic and osteogenic distraction surgical orthodontics C11                | Liu et al (2)                             | 134                     | 2018        | J. Craniofac. Surg.            | Y                     | N                      | Y                            | Y                      | 6                               | 9                                 | Previous study                                                                  | N                    |
| 11<br>5                                                                                            | Orthognathic and osteogenic distraction surgical orthodontics C11                | Dos Santos Alves et al (6)                | 135                     | 2019        | Int. J. Oral Maxillofac. Surg. | Y                     | N                      | Y                            | N                      | 5                               | 32                                | Previous study                                                                  | N                    |
| 11<br>6                                                                                            | Cleft alveolus, submucous cleft and all types of cleft palate closure/repair C9  | Minatel et al (5)                         | 136                     | 2019        | J. Cranio-Maxillo-Fac. Surg.   | N                     | N                      | N                            | N                      | 3                               | 13                                | Newcastle-Ottawa scale                                                          | N                    |
| 11<br>7                                                                                            | Cleft alveolus, submucous cleft and all types of cleft palate closure/repair C9  | Tache and Mommaerts (2)                   | 137                     | 2019        | Cleft Palate Craniofac J       | N                     | N                      | Y                            | N                      | 4                               | 36                                | MINORS                                                                          | N                    |
| 11<br>8                                                                                            | Conventional radiography and 2D imaging B4                                       | Corthouts et al (4)                       | 138                     | 2020        | PlastAesthet Res               | N                     | Y                      | Y                            | Y                      | 2                               | 11                                | Previous study                                                                  | N                    |

**Annexure 4:** Detailed characteristics of included studies as Domain, Subdomain I and code, Subdomain II and code ( refer to Figure 1 and Table 1 for subdomains and codes), Author and number of reviewers, reference number (as numbered in the reference list of paper), year, journal of publication, language limits, Time limitation, hand/reference searching, grey literature search, number of databases used, number of included studies, Risk of bias tool used for quality assessment and meta-analysis. (Abbreviation Nos.= Numbers, Y= Present, N= Not present). Color codes have been done for different Domains and subdomains (I and II) are as presented in Table 1.

|                                                                                                                                                                    |                                                                                                                              |                                           |                           |             |                                          |                       |                        |                               |                        |                                 |                                   |                                                   |                      |
|--------------------------------------------------------------------------------------------------------------------------------------------------------------------|------------------------------------------------------------------------------------------------------------------------------|-------------------------------------------|---------------------------|-------------|------------------------------------------|-----------------------|------------------------|-------------------------------|------------------------|---------------------------------|-----------------------------------|---------------------------------------------------|----------------------|
| 119                                                                                                                                                                | Other surgical aspects of cleft lip and palate including revisions, scar management, post-operative pain and anaesthesia C12 | Miranda et al (5)                         | 139                       | 2020        | J Craniofac Surg.                        | N                     | N                      | N                             | N                      | 4                               | 18                                | MINORS                                            | N                    |
| 120                                                                                                                                                                | Cleft alveolus, submucous cleft and all types of cleft palate closure/repair C9                                              | Vandenberg et al (4)                      | 140                       | 2020        | Cleft Palate Craniofac J                 | Y                     | N                      | Y                             | N                      | 4                               | 9                                 | Newcastle-Ottawa scale                            | Y                    |
| 121                                                                                                                                                                | Orthognathic and osteogenic distraction surgical orthodontics C11                                                            | Velasquese al (5)                         | 141                       | 2020        | Oral and Maxillofacial Surgery           | Y                     | N                      | Y                             | Y                      | 3                               | 10                                | PRISMA                                            | N                    |
| 122                                                                                                                                                                | Cleft Lip repair C8                                                                                                          | Egbunah et al (6)                         | 142                       | 2021        | Cleft Palate Craniofac J                 | Y                     | N                      | Y                             | Y                      | 2                               | 6                                 | Previous study                                    | Y                    |
| 123                                                                                                                                                                | Orthognathic and osteogenic distraction surgical orthodontics C11                                                            | Valls-Ontanon et al (4)                   | 143                       | 2021        | Journal of Cranio-Maxillo-Facial Surgery | Y                     | N                      | Y                             | Y                      | 2                               | 29                                | Previous study, GRADE                             | Y                    |
| <b>Sub-domain I - Oral health aspects including dental caries and other dental problems D6</b>                                                                     |                                                                                                                              |                                           |                           |             |                                          |                       |                        |                               |                        |                                 |                                   |                                                   |                      |
| <i>N os.</i>                                                                                                                                                       | <i>Subdomain II and code</i>                                                                                                 | <i>Author and number of reviewers (n)</i> | <i>Refere nce numbe r</i> | <i>Year</i> | <i>Journal</i>                           | <i>Language limit</i> | <i>Time limitation</i> | <i>Hand/ Reference search</i> | <i>Grey literature</i> | <i>Number of databases used</i> | <i>Number of Included studies</i> | <i>Risk of Bias Tool Used/ quality assessment</i> | <i>Meta-analysis</i> |
| 124                                                                                                                                                                | N/A                                                                                                                          | Worth et al (6)                           | 144                       | 2017        | British Dental Journal                   | N                     | N                      | Y                             | Y                      | 10                              | 24                                | Previous study (Agbaje et al)                     | Y                    |
| 125                                                                                                                                                                | Conventional orthodontics C6                                                                                                 | Vale et al (5)                            | 145                       | 2021        | Int J Dent Hygiene.                      | Y                     | N                      | N                             | N                      | 5                               | 2                                 | ROBINS-I                                          | Y                    |
| <b>Domain. E. PSYCHOSOCIAL ASPECTS, PERCEPTIONS AND QUALITY OF LIFE</b>                                                                                            |                                                                                                                              |                                           |                           |             |                                          |                       |                        |                               |                        |                                 |                                   |                                                   |                      |
| <b>Sub-domain I - Psychosocial aspects, perceptions and quality of life of family members of the patients with CLP, lay people and healthcare professionals E1</b> |                                                                                                                              |                                           |                           |             |                                          |                       |                        |                               |                        |                                 |                                   |                                                   |                      |
| <i>N os.</i>                                                                                                                                                       | <i>Subdomain II and code</i>                                                                                                 | <i>Author and number of reviewers (n)</i> | <i>Refere nce numbe r</i> | <i>Year</i> | <i>Journal</i>                           | <i>Language limit</i> | <i>Time limitation</i> | <i>Hand/ Reference search</i> | <i>Grey literature</i> | <i>Number of databases used</i> | <i>Number of Included studies</i> | <i>Risk of Bias Tool Used/ quality assessment</i> | <i>Meta-analysis</i> |
| 126                                                                                                                                                                | N/A                                                                                                                          | Zhu et al (3)                             | 146                       | 2016        | Cleft Palate Craniofac J                 | N                     | N                      | Y                             | N                      | 5                               | 11                                | Previous study                                    | N                    |

**Annexure 4:** Detailed characteristics of included studies as Domain, Subdomain I and code, Subdomain II and code ( refer to Figure 1 and Table 1 for subdomains and codes), Author and number of reviewers, reference number (as numbered in the reference list of paper), year, journal of publication, language limits, Time limitation, hand/reference searching, grey literature search, number of databases used, number of included studies, Risk of bias tool used for quality assessment and meta-analysis. (Abbreviation Nos.= Numbers, Y= Present, N= Not present). Color codes have been done for different Domains and subdomains (I and II) are as presented in Table 1.

|                                                                                                     |                                                                                                                              |                                           |                         |             |                             |                       |                        |                              |                        |                                 |                                   |                                                                              |                      |
|-----------------------------------------------------------------------------------------------------|------------------------------------------------------------------------------------------------------------------------------|-------------------------------------------|-------------------------|-------------|-----------------------------|-----------------------|------------------------|------------------------------|------------------------|---------------------------------|-----------------------------------|------------------------------------------------------------------------------|----------------------|
| 127                                                                                                 | Presurgical Infant Orthopaedics and Naso-Alveolar Moulding C3                                                                | El-Ghafour et al (5)                      | 147                     | 2020        | Maced J Med Sci             | Y                     | N                      | Y                            | Y                      | 7                               | 1                                 | Cochrane Collaboration's tool                                                | N                    |
| 128                                                                                                 | Feeding and nutrition in patients C2                                                                                         | Srivastav et al (6)                       | 148                     | 2021        | Spec Care Dentist.          | N                     | N                      | Y                            | Y                      | 5                               | 8                                 | JBIC                                                                         | N                    |
| <b>Sub-domain I - Psychosocial aspects, perceptions and quality of life of patients with CLP E2</b> |                                                                                                                              |                                           |                         |             |                             |                       |                        |                              |                        |                                 |                                   |                                                                              |                      |
| <i>N os.</i>                                                                                        | <i>Subdomain II and code</i>                                                                                                 | <i>Author and number of reviewers (n)</i> | <i>Reference number</i> | <i>Year</i> | <i>Journal</i>              | <i>Language limit</i> | <i>Time limitation</i> | <i>Hand/Reference search</i> | <i>Grey literature</i> | <i>Number of databases used</i> | <i>Number of Included studies</i> | <i>Risk of Bias Tool Used/ quality assessment</i>                            | <i>Meta-analysis</i> |
| 129                                                                                                 | N/A                                                                                                                          | Antonarakis et al (3)                     | 149                     | 2013        | Community Dent. Health      | N                     | N                      | Y                            | Y                      | 6                               | 3                                 | Cochrane Collaboration's tool                                                | N                    |
| 130                                                                                                 | N/A                                                                                                                          | Herkath et al (4)                         | 150                     | 2015        | Cleft Palate Craniofac J    | Y                     | N                      | Y                            | N                      | 8                               | 23                                | STROBE                                                                       | Y                    |
| 131                                                                                                 | N/A                                                                                                                          | Chung et al (5)                           | 151                     | 2019        | PlastReconstrSurg Glob Open | Y                     | Y                      | Y                            | Y                      | 3                               | 15                                | Joanna Briggs Institute (JBI) checklist                                      | N                    |
| 132                                                                                                 | Other surgical aspects of cleft lip and palate including revisions, scar management, post-operative pain and anaesthesia C12 | Acum et al (6)                            | 152                     | 2020        | Cleft Palate Craniofac J    | Y                     | N                      | Y                            | N                      | 5                               | 22                                | tailored version of the SIGN-50 rating tool                                  | N                    |
| 133                                                                                                 | Anatomical and functional characteristics A6                                                                                 | Glinianaia et al (6)                      | 153                     | 2021        | Birth Defects Research      | Y                     | N                      | Y                            | Y                      | 5                               | 39                                | Newcastle–Ottawa Scale (modified)                                            | Y                    |
| 134                                                                                                 | Conventional orthodontics C6                                                                                                 | Nascimento et al (5)                      | 154                     | 2021        | Eur J Orthod.               | N                     | N                      | Y                            | Y                      | 6                               | 13                                | Fowkes and Fulton qualifier                                                  | Y                    |
| <b>Sub-domain I - Burden of care E3</b>                                                             |                                                                                                                              |                                           |                         |             |                             |                       |                        |                              |                        |                                 |                                   |                                                                              |                      |
| <i>N os.</i>                                                                                        | <i>Subdomain II and code</i>                                                                                                 | <i>Author and number of reviewers (n)</i> | <i>Reference number</i> | <i>Year</i> | <i>Journal</i>              | <i>Language limit</i> | <i>Time limitation</i> | <i>Hand/Reference search</i> | <i>Grey literature</i> | <i>Number of databases used</i> | <i>Number of Included studies</i> | <i>Risk of Bias Tool Used/ quality assessment</i>                            | <i>Meta-analysis</i> |
| 135                                                                                                 | Presurgical Infant Orthopaedics and Naso-Alveolar Moulding C3                                                                | Alfonso et al (8)                         | c                       | 2020        | Cleft Palate Craniofac J    | Y                     | N                      | N                            | N                      | 5                               | 29                                | Cochrane risk-of-bias, ROBINS-I Scale, CLARITY Group Risk of Bias Instrument | N                    |

**Annexure 4:** Detailed characteristics of included studies as Domain, Subdomain I and code, Subdomain II and code ( refer to Figure 1 and Table 1 for subdomains and codes), Author and number of reviewers, reference number (as numbered in the reference list of paper), year, journal of publication, language limits, Time limitation, hand/reference searching, grey literature search, number of databases used, number of included studies, Risk of bias tool used for quality assessment and meta-analysis. (Abbreviation Nos.= Numbers, Y= Present, N= Not present). Color codes have been done for different Domains and subdomains (I and II) are as presented in Table 1.

| Sub-domain I - Health economics E4                                   |                                                                          |                                    |                    |      |                            |                |                 |                        |                 |                          |                            |                                                          |               |
|----------------------------------------------------------------------|--------------------------------------------------------------------------|------------------------------------|--------------------|------|----------------------------|----------------|-----------------|------------------------|-----------------|--------------------------|----------------------------|----------------------------------------------------------|---------------|
| N os.                                                                | Subdomain II and code                                                    | Author and number of reviewers (n) | Refere nce numbe r | Year | Journal                    | Language limit | Time limitation | Hand/ Reference search | Grey literature | Number of databases used | Number of Included studies | Risk of Bias Tool Used/ quality assessment               | Meta-analysis |
| 136                                                                  | Burden of care E3                                                        | Saxton et al (7)                   | 156                | 2016 | PLoS One                   | Y              | Y               | Y                      | Y               | 3                        | 86                         | Previous study                                           | N             |
| Domain F. PREVENTIVE                                                 |                                                                          |                                    |                    |      |                            |                |                 |                        |                 |                          |                            |                                                          |               |
| Sub-domain I - Risk assessment and prediction F2                     |                                                                          |                                    |                    |      |                            |                |                 |                        |                 |                          |                            |                                                          |               |
| N os.                                                                | Subdomain II and code                                                    | Author and number of reviewers (n) | Refere nce numbe r | Year | Journal                    | Language limit | Time limitation | Hand/ Reference search | Grey literature | Number of databases used | Number of Included studies | Risk of Bias Tool Used/ quality assessment               | Meta-analysis |
| 137                                                                  | Genetics A4                                                              | Zhao et al (8)                     | 157                | 2016 | F1000Research              | N              | N               | Y                      | Y               | 5                        | 10                         | CONSORT, STROBE                                          | Y             |
| 138                                                                  | Genetics A4                                                              | Wang et al (7)                     | 158                | 2018 | Bioscience Reports         | N              | N               | Y                      | N               | 6                        | 7                          | Newcastle–Ottawa scale                                   | Y             |
| 139                                                                  | Genetics A4                                                              | Shu et al (3)                      | 159                | 2019 | Br J Oral Maxillofac Surg. | N              | N               | Y                      | N               | 3                        | 34                         | Newcastle-Ottawa scale                                   | Y             |
| 140                                                                  | Genetics A4                                                              | Zhou et al (7)                     | 160                | 2020 | Birth Defects Research     | N              | Y               | Y                      | Y               | 4                        | 56                         | Newcastle-Ottawa scale and Cochrane's risk of bias tool. | Y             |
| Domain. G. RESEARCH METHODS                                          |                                                                          |                                    |                    |      |                            |                |                 |                        |                 |                          |                            |                                                          |               |
| Sub-domain I - Clinical practice guidelines and Core outcome sets G1 |                                                                          |                                    |                    |      |                            |                |                 |                        |                 |                          |                            |                                                          |               |
| N os.                                                                | Subdomain II and code                                                    | Author and number of reviewers (n) | Refere nce numbe r | Year | Journal                    | Language limit | Time limitation | Hand/ Reference search | Grey literature | Number of databases used | Number of Included studies | Risk of Bias Tool Used/ quality assessment               | Meta-analysis |
| 141                                                                  | Oral health aspects including dental caries and other dental problems D6 | Saikia et al (10)                  | 161                | 2021 | Cleft Palate Craniofac J   | N              | N               | Y                      | Y               | 6                        | 7                          | AGREE II                                                 | N             |
| Sub-domain I - Methodological aspects G3                             |                                                                          |                                    |                    |      |                            |                |                 |                        |                 |                          |                            |                                                          |               |



**Annexure 4:** Detailed characteristics of included studies as Domain, Subdomain I and code, Subdomain II and code ( refer to Figure 1 and Table 1 for subdomains and codes), Author and number of reviewers, reference number (as numbered in the reference list of paper), year, journal of publication, language limits, Time limitation, hand/reference searching, grey literature search, number of databases used, number of included studies, Risk of bias tool used for quality assessment and meta-analysis. (Abbreviation Nos.= Numbers, Y= Present, N= Not present). Color codes have been done for different Domains and subdomains (I and II) are as presented in Table 1.

| <i>N os.</i>                                                                       | <i>Subdomain II and code</i>                   | <i>Author and number of reviewers (n)</i> | <i>Refere nce numbe r</i> | <i>Year</i> | <i>Journal</i>           | <i>Language limit</i> | <i>Time limitation</i> | <i>Hand/ Reference search</i> | <i>Grey literature</i> | <i>Number of databases used</i> | <i>Number of Included studies</i> | <i>Risk of Bias Tool Used/ quality assessment</i> | <i>Meta-analysis</i> |
|------------------------------------------------------------------------------------|------------------------------------------------|-------------------------------------------|---------------------------|-------------|--------------------------|-----------------------|------------------------|-------------------------------|------------------------|---------------------------------|-----------------------------------|---------------------------------------------------|----------------------|
| 142                                                                                | N/A                                            | Hardwicke et al (3)                       | 162                       | 2017        | Cleft Palate Craniofac J | Y                     | Y                      | N                             | N                      | 3                               | 65                                | CONSORT guidelines                                | N                    |
| Domain. H. RECENT ADVANCES                                                         |                                                |                                           |                           |             |                          |                       |                        |                               |                        |                                 |                                   |                                                   |                      |
| Sub-domain I - Any recent research area not covered in the above categorization H1 |                                                |                                           |                           |             |                          |                       |                        |                               |                        |                                 |                                   |                                                   |                      |
| <i>N os.</i>                                                                       | <i>Subdomain II and code</i>                   | <i>Author and number of reviewers (n)</i> | <i>Refere nce numbe r</i> | <i>Year</i> | <i>Journal</i>           | <i>Language limit</i> | <i>Time limitation</i> | <i>Hand/ Reference search</i> | <i>Grey literature</i> | <i>Number of databases used</i> | <i>Number of Included studies</i> | <i>Risk of Bias Tool Used/ quality assessment</i> | <i>Meta-analysis</i> |
| 143                                                                                | Alveolar bone grafting and graft materials C10 | Shanbhag et al (6)                        | 163                       | 2019        | J Clin Periodontol       | N                     | N                      | Y                             | Y                      | 3                               | 77                                | Cochrane                                          | Y                    |
| 144                                                                                | Genetics A4                                    | Wei et al (6)                             | 164                       | 2022        | Archives of Oral Biology | Y                     | N                      | N                             | N                      | 4                               | 16                                | Newcastle–Ottawa Scale                            | N                    |
