# Supplementary material for: Evidence Mapping and Quality Analysis of Systematic Reviews on Various Aspects Related to Cleft Lip and Palate
Source: MDPI journal article supplement (doi:10.3390/jcm12186002), 2023-09-16
Supplement: s1 [file s1]

**Annexure 7:** Table showing details of ongoing studies registered in PROSPERO and their categorization as domains and subdomains of cleft lip and palate. For subdomains (Subdomain I and Subdomain II) and the codes, refer to Table 1 and Figure 1.

| Domain A: EPIDEMIOLOGIC |                                                               |                                                                                                                                                                                                   |                                               |                         |      |
|-------------------------|---------------------------------------------------------------|---------------------------------------------------------------------------------------------------------------------------------------------------------------------------------------------------|-----------------------------------------------|-------------------------|------|
| Subdomain I             |                                                               |                                                                                                                                                                                                   | Incidence And Prevalence, A1                  |                         |      |
| SNo                     | First Author                                                  | Title                                                                                                                                                                                             | Year                                          | Subdomain II            | Code |
| 1                       | Shahd Mustafa<br><a href="#">CRD42019121276</a>               | The Prevalence of Dental Anomalies In Non-Syndromic Individuals With Cleft Lip And/Or Palate: A Systematic Review And Meta-Analysis                                                               | 2019                                          |                         |      |
| 2                       | Elias Yirdaw<br><a href="#">CRD42021266844</a>                | Prevalence Of Cleft Lip Or/And Cleft Palate And Its Associated Factors: A Systematic Review And Meta-Analysis Of Studies In Africa                                                                | 2021                                          | Etiopathogenesis        | A2   |
| Subdomain I             |                                                               |                                                                                                                                                                                                   | Etiopathogenesis, A2                          |                         |      |
| SNo                     | First Author                                                  | Title                                                                                                                                                                                             | Year                                          | Subdomain II            | Code |
| 3                       | Gemma Sharp<br><a href="#">CRD42015026004</a>                 | Risk Factors for Orofacial Clefts                                                                                                                                                                 | 2015                                          |                         |      |
| 4                       | Puhan He<br><a href="#">CRD42017074813</a>                    | The Effect of Folic Acid Supplementation on The Prevention Of Cleft Lip And Palate: A Systematic Review And Meta-Analysis                                                                         | 2017                                          |                         |      |
| 5                       | Estefania Ramírez<br><a href="#">CRD42018075593</a>           | Risk Factors (O, C) Identified in The Presentation Of Non Syndromic Cleft Lip And/Or Cleft Palate(I) In Latin America (P): A Systematic Review                                                    | 2018                                          |                         |      |
| 6                       | Mengwen Zheng<br><a href="#">CRD42018111050</a>               | RARA Gene Polymorphisms and Nonsyndromic Cleft Lip and Palate Risk: A Systematic Review And Meta-Analysis                                                                                         | 2018                                          | Genetics                | A4   |
| 7                       | Aida Abou-Zamzam<br><a href="#">CRD42018104942</a>            | Systematic Review and Meta-Analysis of Maternal Folic Acid Supplementation And The Risk Of Orofacial Clefts In Offspring                                                                          | 2018                                          |                         |      |
| 8                       | Lucimara Teixeira Das Neves<br><a href="#">CRD42020139014</a> | Environmental Risk Factors in The Non-Syndromic Cleft Lip And Palate Etiology: A Systematic Review.                                                                                               | 2020                                          |                         |      |
| 9                       | Thirona Naicker<br><a href="#">CRD42020199361</a>             | Systematic Review on The Known Variants And Genes Associated With Orofacial Clefts In Africa                                                                                                      | 2020                                          | Genetics                | A4   |
| 10                      | Azeez Alade<br><a href="#">CRD42021268825</a>                 | A Systematic Review and Meta-Analysis To Determine The Association Between Periconceptional Use Of Vitamin A And The Risk Of Giving Birth To A Child With Non-Syndromic Orofacial Clefts (Nsofcs) | 2021                                          | Embryologic Development | A3   |
| 11                      | Adriana Da Silva<br><a href="#">CRD42021295575</a>            | Association Between Orofacial Clefts and Cancer: A Systematic Review And Meta-Analysis                                                                                                            | 2021                                          | Systemic Problems       | D7   |
| Subdomain I             |                                                               |                                                                                                                                                                                                   | Anatomical And Functional Characteristics, A6 |                         |      |
| SNo                     | First Author                                                  | Title                                                                                                                                                                                             | Year                                          | Subdomain II            | Code |

**Annexure 7:** Table showing details of ongoing studies registered in PROSPERO and their categorization as domains and subdomains of cleft lip and palate. For subdomains (Subdomain I and Subdomain II) and the codes, refer to Table 1 and Figure 1.

|                             |                                                                       |                                                                                                                                                                         |                                        |                                                                       |             |
|-----------------------------|-----------------------------------------------------------------------|-------------------------------------------------------------------------------------------------------------------------------------------------------------------------|----------------------------------------|-----------------------------------------------------------------------|-------------|
| 12                          | Paulo Martins-Filho<br><a href="#">CRD42015027327</a>                 | Analysis Of The Pharyngeal Airway Volume In Children And Adolescents With Cleft Lip And Palate Using Cone Beam Computed Tomography: Systematic Review And Meta-Analysis | 2015                                   | Advanced Radiography Including 3d Imaging And 3d Printing             | B6          |
| 13                          | Victoria Worth<br><a href="#">CRD42015020403</a>                      | Oral Health In (Children With) Cleft Lip And Palate: A Systematic Review And Meta-Analysis                                                                              | 2015                                   | Oral Health Aspects Including Dental Caries And Other Dental Problems | D6          |
| 14                          | Emily Tamie Sá Nakamura<br><a href="#">CRD42015020041</a>             | Simonart's Band Influence On Maxilo-Mandibular Relationship Of Complete Cleft Lip And Palate Patients: A Systematic Review                                              | 2015                                   |                                                                       |             |
| 15                          | Anne Marie Kuijpers-Jagtman<br><a href="#">CRD42018088945</a>         | Comparison Of Pharyngeal Airway Space Between Cleft Lip And Palate Patients And Non-Cleft Individuals: A Systematic Review                                              | 2018                                   |                                                                       |             |
| 16                          | Evelyn Del Rosario Munayco Pantoja<br><a href="#">CRD42020209876</a>  | Enamel Defects In Non-Syndromic Patients With Cleft Lip And Palate: A Systematic Review And Meta-Analysis                                                               | 2020                                   |                                                                       |             |
| 17                          | Allessandra Fraga Da Re<br><a href="#">CRD42020181208</a>             | Myofunctional Orofacial Evaluation For Cleft Lip And Palate: Systematic Review                                                                                          | 2020                                   |                                                                       |             |
| 18                          | Valerie Hereman<br><a href="#">CRD42016051796</a>                     | Tooth Impaction In Cleft Patients: A Systematic Review                                                                                                                  | 2020                                   |                                                                       |             |
| 19                          | Ana Carolina Exner Fernandes Barros<br><a href="#">CRD42021281041</a> | Prevalence Of Obstructive Sleep Apnea In Pediatric Patients With Cleft Lip And Palate: A Systematic Review                                                              | 2021                                   | Obstructive Sleep Apnoea                                              | D5          |
| 20                          | Simar Sethi<br><a href="#">CRD42021292425</a>                         | Is caries prevalence site-specific in cleft lip and palate patients? : A systematic review and meta-analysis                                                            | 2021                                   | Oral Health Aspects Including Dental Caries And Other Dental Problems | D6          |
| 21                          | Karina Gabryella maringonda Vicente<br><a href="#">CRD42021273836</a> | Maxillary Sinus Analysis By Cone Beam Computed Tomography In Patients Diagnosed With Unilateral Cleft Palate: A Systematic Review                                       | 2021                                   | Advanced Radiography Including 3d Imaging And 3d Printing             | B6          |
| 22                          | Eva Cadenas<br><a href="#">CRD42022297888</a>                         | Craniofacial Skeletal Relations In Patients With Cleft Lip And Palate Using Multivariation Analysis                                                                     | 2022                                   |                                                                       |             |
| 23                          | Inês Francisco<br><a href="#">CRD42022287414</a>                      | Velopharyngeal Insufficiency Treatment In Cleft Palate Patients: Umbrella Review                                                                                        | 2022                                   |                                                                       |             |
| <b>Domain B: DIAGNOSTIC</b> |                                                                       |                                                                                                                                                                         |                                        |                                                                       |             |
| <b>Subdomain I</b>          |                                                                       |                                                                                                                                                                         | <b>Prenatal Diagnosis, B3</b>          |                                                                       |             |
| <b>SNo</b>                  | <b>First Author</b>                                                   | <b>Title</b>                                                                                                                                                            | <b>Year</b>                            | <b>Subdomain II</b>                                                   | <b>Code</b> |
| 24                          | Joana Prota<br><a href="#">CRD42016036400</a>                         | Diagnostic Yield Of Chromosomal Microarray For Etiologic Diagnosis Of Typical Orofacial Clefts: A Systematic Review And Meta-Analysis                                   | 2016                                   | Genetics                                                              | A4          |
| <b>Subdomain I</b>          |                                                                       |                                                                                                                                                                         | <b>Clinical Diagnostic Methods, B4</b> |                                                                       |             |

**Annexure 7:** Table showing details of ongoing studies registered in PROSPERO and their categorization as domains and subdomains of cleft lip and palate. For subdomains (Subdomain I and Subdomain II) and the codes, refer to Table 1 and Figure 1.

| SNo                          | First Author                                                     | Title                                                                                                                                                                                               | Year                                                                 | Subdomain II                                                  | Code |
|------------------------------|------------------------------------------------------------------|-----------------------------------------------------------------------------------------------------------------------------------------------------------------------------------------------------|----------------------------------------------------------------------|---------------------------------------------------------------|------|
| 25                           | Elena González Cano<br><a href="#">CRD42021232044</a>            | Facial Asymmetry Assessment In Cleft And Non-Cleft Patients                                                                                                                                         | 2021                                                                 |                                                               |      |
| 26                           | Claudia Acosta Lenis<br><a href="#">CRD42021291821</a>           | Maxillary Distraction Osteogenesis And/Or Le Fort I In Cleft Lip And Palate Patients. Is The 10 Mm Discrepancy A Baseline To Decide?: A Systematic Review                                           | 2021                                                                 | Orthognathic And Osteogenic Distraction Surgical Orthodontics | C11  |
| <b>Subdomain I</b>           |                                                                  |                                                                                                                                                                                                     | <b>Conventional Radiography and 2D Imaging, B5</b>                   |                                                               |      |
| SNo                          | First Author                                                     | Title                                                                                                                                                                                               | Year                                                                 | Subdomain II                                                  | Code |
| 27                           | Hayley Llandro<br><a href="#">CRD42015026476</a>                 | A Systematic Review To Investigate The Factors That Contribute To The Radiographic Success Of Alveolar Bone Grafting In Cleft Lip And Palate Patients                                               | 2015                                                                 | Alveolar Bone Grafting And Graft Materials                    | C10  |
| 28                           | Karthik Sennimalai<br><a href="#">CRD42021261941</a>             | Can Cephalometric Parameters Predict The Future Need For Orthognathic Surgery In Non-Syndromic Cleft Patients? A Systematic Review And Meta-Analysis                                                | 2021                                                                 | Orthognathic And Osteogenic Distraction Surgical Orthodontics | C11  |
| 29                           | Nameksh Raj Bhupali<br><a href="#">CRD42021257549</a>            | Radiographic Assessment Of Pharyngeal Airway In Non-Syndromic Patients With Repaired Cleft Lip And Palate: A Systematic Review                                                                      | 2021                                                                 | Anatomical And Functional Characteristics                     | A6   |
| 30                           | Katarzyna Lewusz<br><a href="#">CRD42014013079</a>               | Two-Dimensional And Three-Dimensional Imaging In Cleft Palate Patients: Systematic Review                                                                                                           | 2014                                                                 | Advanced Radiography Including 3d Imaging And 3d Printing     | B6   |
| <b>Subdomain I</b>           |                                                                  |                                                                                                                                                                                                     | <b>Advanced Radiography Including 3D Imaging and 3D Printing, B6</b> |                                                               |      |
| SNo                          | First Author                                                     | Title                                                                                                                                                                                               | Year                                                                 | Subdomain II                                                  | Code |
| 31                           | Ana Maria Ceron-Zapata<br><a href="#">CRD42017069500</a>         | Comparison Of Three-Dimensional Changes Of Nasal Soft Tissue And The Maxillary Arch In Patients With Bilateral Cleft Lip And Palate Treated With Presurgical Orthopaedic Therapy. Systematic Review | 2017                                                                 | Presurgical Infant Orthopaedics And Naso-Alveolar Moulding    | C3   |
| 32                           | Victor Fabrizio Cabrerapazmino<br><a href="#">CRD42021262591</a> | Stereophotogrammetry 3d, Direct Measurements, 2d, Calipter And Plaster Models In Patients With Cleft Lip And Palate: Systematic Review Of Comparative Studies                                       | 2021                                                                 | Photography And Records                                       | B7   |
| 33                           | Anna Pelc<br><a href="#">CRD42020175924</a>                      | Three Dimensional Methods Used To Asses Soft Tissue Symmetry In Patients With Ucl/P- Systematic Literature Review.                                                                                  | 2020                                                                 |                                                               |      |
| <b>Subdomain I</b>           |                                                                  |                                                                                                                                                                                                     | <b>Photography And Records, B7</b>                                   |                                                               |      |
| SNo                          | First Author                                                     | Title                                                                                                                                                                                               | Year                                                                 | Subdomain II                                                  | Code |
| 34                           | Jyotsna Unnikrishnan<br><a href="#">CRD42022298846</a>           | Efficacy Of Digital Intraoral Scanning And Digital Models In Cleft Lip And Palate Care                                                                                                              | 2022                                                                 |                                                               |      |
| <b>Domain C: THERAPEUTIC</b> |                                                                  |                                                                                                                                                                                                     |                                                                      |                                                               |      |
| <b>Subdomain I</b>           |                                                                  |                                                                                                                                                                                                     | <b>Feeding And Nutrition In Patients, C2</b>                         |                                                               |      |

**Annexure 7:** Table showing details of ongoing studies registered in PROSPERO and their categorization as domains and subdomains of cleft lip and palate. For subdomains (Subdomain I and Subdomain II) and the codes, refer to Table 1 and Figure 1.

| SNo                | First Author                                                   | Title                                                                                                                                                                                       | Year                                                                                 | Subdomain II                                              | Code |
|--------------------|----------------------------------------------------------------|---------------------------------------------------------------------------------------------------------------------------------------------------------------------------------------------|--------------------------------------------------------------------------------------|-----------------------------------------------------------|------|
| 35                 | Manjubala Dash<br><a href="#">CRD42020208437</a>               | Feeding Interventions Among Cleft Lip/ Palate Infants- A Systematic Review And Meta Synthesis Of Qualitative, Quantitative And Mixed Methods Studies                                        | 2020                                                                                 |                                                           |      |
| <b>Subdomain I</b> |                                                                |                                                                                                                                                                                             | <b>Presurgical Infant Orthopaedics And Naso-Alveolar Moulding, C3</b>                |                                                           |      |
| SNo                | First Author                                                   | Title                                                                                                                                                                                       | Year                                                                                 | Subdomain II                                              | Code |
| 36                 | Himanshi Aggarwal<br><a href="#">CRD42020213403</a>            | Presurgical Naso-Alveolar Molding Device Fabricated Using Cadcam Versus Conventional Technique For Cleft Lip And Palate Patients: A Systematic Review                                       | 2020                                                                                 | Advanced Radiography Including 3d Imaging And 3d Printing | B6   |
| 37                 | Julio Villanueva<br><a href="#">CRD42020147963</a>             | Effectiveness Of Pre-Surgical Orthopedics In The Treatment Of Patients With Unilateral Cleft Lip And Palate: Systematic Review And Meta-Analysis                                            | 2020                                                                                 | Effects/Complications Of PSIO And PNAM                    | D2   |
| 38                 | Prabhat Kumar Chaudhari<br><a href="#">CRD42020186452</a>      | Efficacy Of Digital Nasoalveolar Molding To Reduce The Severity Of The Malformation In Individuals With Cleft Lip And/Or Palate: A Systematic Review                                        | 2020                                                                                 | Effects/Complications Of PSIO And PNAM                    | D2   |
| 39                 | Rathindra Nath Bera<br><a href="#">CRD42021271267</a>          | Presurgical Infant Orthopedics Prior To Definitive Treatment In Patients With Cleft Lip And Palate: A Meta Analysis Of Facial Esthetics, Growth, Fistula Rates And Dentoalveolar Arch Forms | 2021                                                                                 | Effects/Complications Of PSIO And PNAM                    | D2   |
| 40                 | Ana Rabal Solans<br><a href="#">RD42022303417</a>              | Evaluation Of Presurgical Orthopedics In The Cleft Lip And Palate                                                                                                                           | 2022                                                                                 |                                                           |      |
| <b>Subdomain I</b> |                                                                |                                                                                                                                                                                             | <b>Early Orthodontics, C4</b>                                                        |                                                           |      |
| SNo                | First Author                                                   | Title                                                                                                                                                                                       | Year                                                                                 | Subdomain II                                              | Code |
| 41                 | Hamza Siddiqui<br><a href="#">CRD42021229018</a>               | Efficacy Of Bone-Anchored Maxillary Protraction Over Face-Mask In Patients With A Non-Syndromic Unilateral Cleft Lip And Plate- A Systematic Review                                         | 2021                                                                                 |                                                           |      |
| 42                 | Badri Thiruvengkatachari<br><a href="#">CRD42022248503</a>     | Effectiveness Of Prealveolar Bone Graft Orthodontics For Patients With Non-Syndromic Unilateral Cleft Palate: A Systematic Review And Meta-Analysis                                         | 2022                                                                                 |                                                           |      |
| 43                 | Marina Tavares Costa Nobrega<br><a href="#">CRD42021240533</a> | Effects Of Maxillary Protraction On The Upper Airway Dimensions Of Growing Individuals With Cleft Lip And Palate: A Systematic Review                                                       | 2021                                                                                 | Anatomical And Functional Characteristics                 | A6   |
| <b>Subdomain I</b> |                                                                |                                                                                                                                                                                             | <b>Orthodontic And Surgical Perspectives Of Secondary Alveolar Bone Grafting, C5</b> |                                                           |      |
| SNo                | First Author                                                   | Title                                                                                                                                                                                       | Year                                                                                 | Subdomain II                                              | Code |
| 44                 | Chenzhou Wu<br><a href="#">CRD42014009942</a>                  | What Are The Optimal Choices For Clinicians When Conducting Secondary Bone Grafting For Patients With Alveolar Cleft Defects? A Systematic Review                                           | 2014                                                                                 |                                                           |      |
| 45                 | Mohamed Abd El-Ghafour<br><a href="#">CRD42021261683</a>       | Timing Of Orthodontic Treatment And The Success Of Secondary Alveolar Bone Grafting In Patients With Cleft Lip And Palate                                                                   | 2021                                                                                 |                                                           |      |

**Annexure 7:** Table showing details of ongoing studies registered in PROSPERO and their categorization as domains and subdomains of cleft lip and palate. For subdomains (Subdomain I and Subdomain II) and the codes, refer to Table 1 and Figure 1.

| Subdomain I |                                                     |                                                                                                                                                                                                                   | Conventional Orthodontics, C6                                                    |                                                           |      |
|-------------|-----------------------------------------------------|-------------------------------------------------------------------------------------------------------------------------------------------------------------------------------------------------------------------|----------------------------------------------------------------------------------|-----------------------------------------------------------|------|
| SNo         | First Author                                        | Title                                                                                                                                                                                                             | Year                                                                             | Subdomain II                                              | Code |
| 46          | Lucas Cardinal<br><a href="#">CRD42017075334</a>    | Slow And Rapid Maxillary Expansion On Cleft Lip And Palate Subjects: A Systematic Review                                                                                                                          | 2017                                                                             |                                                           |      |
| 47          | Flavia Preda<br><a href="#">CRD42021239676</a>      | Cbct Assessment Of Rapid Palatal Expansion In Patients With Unilateral Cleft - A Systematic Review                                                                                                                | 2021                                                                             | Advanced Radiography Including 3d Imaging And 3d Printing | B6   |
| 48          | Vaibhav Gandhi<br><a href="#">CRD42021247529</a>    | Skeletal And Dental Effects Of The Bone-Anchored Maxillary Protraction Therapy In Cleft Lip And Palate Patients- A Systematic Review And Meta-Analysis                                                            | 2021                                                                             |                                                           |      |
| 49          | Jonathan Luyten<br><a href="#">CRD42022302844</a>   | Rapid Maxillary Expansion Versus Slow Maxillary Expansion In Cleft Lip And Palate Patients: A Systematic Review And Meta Analysis                                                                                 | 2022                                                                             |                                                           |      |
| Subdomain I |                                                     |                                                                                                                                                                                                                   | Cleft Lip Repair, C8                                                             |                                                           |      |
| SNo         | First Author                                        | Title                                                                                                                                                                                                             | Year                                                                             | Subdomain II                                              | Code |
| 50          | Anuj Jain                                           | Comparison Of Octyl – 2 Cyanoacrylate Glue With Other Closure Materials In Terms Of Esthetics And Clinical Outcomes After Cleft Lip Repair Amongst Overall Healthy Patients-A Systematic Review And Meta-Analysis | 2021                                                                             | Outcome Assessment                                        | C15  |
| Subdomain I |                                                     |                                                                                                                                                                                                                   | Cleft Alveolus, Submucous Cleft And All Types Of Cleft Palate Closure/Repair, C9 |                                                           |      |
| SNo         | First Author                                        | Title                                                                                                                                                                                                             | Year                                                                             | Subdomain II                                              | Code |
| 51          | Matthew Fell<br><a href="#">CRD42021296991</a>      | Surgical Approaches To Primarily Reconstruct A Wide Cleft Palate: A Systematic Review                                                                                                                             | 2021                                                                             |                                                           |      |
| 52          | Griffin Bins<br><a href="#">CRD42021282889</a>      | Effect Of Septoplasty In Cleft Repair                                                                                                                                                                             | 2021                                                                             |                                                           |      |
| 53          | Fiachra Sheil<br><a href="#">CRD42021238882</a>     | Efficacy Of Interventions In Preventing Post-Operative Bleeding In Cleft Palate Repair: A Systematic Review                                                                                                       | 2021                                                                             |                                                           |      |
| 54          | Eric Nagengast<br><a href="#">CRD42020193982</a>    | Timing Of Primary Cleft Palate Surgery And Its Association With Postoperative Velopharyngeal Insufficiency: A Systematic Review                                                                                   | 2020                                                                             |                                                           |      |
| Subdomain I |                                                     |                                                                                                                                                                                                                   | Alveolar Bone Grafting And Graft Materials, C10                                  |                                                           |      |
| SNo         | First Author                                        | Title                                                                                                                                                                                                             | Year                                                                             | Subdomain II                                              | Code |
| 55          | Weiyi Pan<br><a href="#">CRD42014009253</a>         | Minimally Invasive Versus Traditional Open Harvesting Techniques For Iliac Bone Graft In Secondary Alveolar Cleft Patients: A Systematic Review                                                                   | 2014                                                                             |                                                           |      |
| 56          | Francisco Filho<br><a href="#">CRD42016032665</a>   | Use Of Rbmbp-2 As An Alternative To Autogenous Bone Grafts For The Treatment Of Alveolar Cleft: A Systematic Review                                                                                               | 2016                                                                             |                                                           |      |
| 57          | Leandro Chambrone<br><a href="#">CRD42016039040</a> | What Is The Best Substitute For Autologous Bone Graft For The Regeneration Of Alveolar Clefts In Humans? A Systematic Review                                                                                      | 2016                                                                             |                                                           |      |

**Annexure 7:** Table showing details of ongoing studies registered in PROSPERO and their categorization as domains and subdomains of cleft lip and palate. For subdomains (Subdomain I and Subdomain II) and the codes, refer to Table 1 and Figure 1.

|                    |                                                                         |                                                                                                                                                                                                                           |                                                                                                                                     |                           |             |
|--------------------|-------------------------------------------------------------------------|---------------------------------------------------------------------------------------------------------------------------------------------------------------------------------------------------------------------------|-------------------------------------------------------------------------------------------------------------------------------------|---------------------------|-------------|
| 58                 | Prakriti Garkhail<br><a href="#">CRD42020171377</a>                     | Intra- And Inter-Rater Analysis Of Linear Outcome Measurement In Secondary Alveolar Bone Graft Surgery Of Cleft Lip And Palate: A Systematic Review                                                                       | 2020                                                                                                                                | Outcome Assessment        | C15         |
| 59                 | Manjula Herath<br><a href="#">CRD42020197451</a>                        | Grafting Materials For Alveolar Cleft Reconstruction: A Systematic Review And Meta-Analysis                                                                                                                               | 2020                                                                                                                                |                           |             |
| 60                 | Alice Nobelika.A<br><a href="#">CRD42021251327</a>                      | Role Of Regenerative Scaffolds As A Substitute For Autogenous Bone Graft In Cleft Patients-A Systematic Review                                                                                                            | 2021                                                                                                                                |                           |             |
| 61                 | Ting Li<br><a href="#">CRD42022312588</a>                               | Outcomes Of Platelet-Rich Fibrin And Iliac Cancellous Bone Transplantation On Alveolar Cleft Bone Grafting: A Meta-Analysis                                                                                               | 2022                                                                                                                                |                           |             |
| <b>Subdomain I</b> |                                                                         |                                                                                                                                                                                                                           | <b>Orthognathic And Osteogenic Distraction Surgical Orthodontics, C11</b>                                                           |                           |             |
| <b>SNo</b>         | <b>First Author</b>                                                     | <b>Title</b>                                                                                                                                                                                                              | <b>Year</b>                                                                                                                         | <b>Subdomain II</b>       | <b>Code</b> |
| 62                 | Hussam Okba<br><a href="#">CRD42016050108</a>                           | Maxillary Skeletal Stability In Non-Growing Cleft Lip And Palate Patients With Maxillary Hypoplasia Using Conventional Orthognathic Surgery Versus Internal Distraction Osteogenesis: Systematic Review And Meta-Analysis | 2016                                                                                                                                | Outcome Assessment        | C15         |
| 63                 | Ildeu Andrade Jr<br><a href="#">CRD42018117952</a>                      | Maxillary Protraction In Cleft Lip And Palate Patients: A Systematic Review.                                                                                                                                              | 2018                                                                                                                                | Conventional Orthodontics | C6          |
| 64                 | Jingadekrishnoji Rao Dayashankara Rao<br><a href="#">CRD42020204710</a> | A Comparative Evaluation Of Anterior Maxillary Distraction And Le-Fort 1 Osteotomy In Cleft Maxillary Hypoplasia For Speech And Relapse. -A Systematic Review                                                             | 2020                                                                                                                                | Outcome Assessment        | C15         |
| 65                 | Alia Eid<br><a href="#">CRD42022301302</a>                              | Maxillary Distraction Osteogenesis Versus Conventional Orthognathic Surgery In Cleft Lip And Palate Patients: Systematic Review                                                                                           | 2022                                                                                                                                |                           |             |
| <b>Subdomain I</b> |                                                                         |                                                                                                                                                                                                                           | <b>Other Surgical Aspects Of Cleft Lip And Palate Including Revisions, Scar Management, Post-Operative Pain And Anaesthesia,C12</b> |                           |             |
| <b>SNo</b>         | <b>First Author</b>                                                     | <b>Title</b>                                                                                                                                                                                                              | <b>Year</b>                                                                                                                         | <b>Subdomain II</b>       | <b>Code</b> |
| 66                 | Shengkai Chen<br><a href="#">CRD42018090279</a>                         | The Effects Of Primary Rhinoplasty In Cleft Lip +/- Palate Children                                                                                                                                                       | 2018                                                                                                                                |                           |             |
| 67                 | Alexander Morzycki<br><a href="#">CRD42018115831</a>                    | Perioperative Analgesia For Children Undergoing Primary Cleft Lip And Palate Repair: A Systematic Review And Meta-Analysis                                                                                                | 2018                                                                                                                                |                           |             |
| 68                 | Christine Ramzy<br><a href="#">CRD42021129413</a>                       | Management Of Post-Surgical Scarring In Cleft Lip And/Or Palate After Primary Repair: A Systematic Review                                                                                                                 | 2021                                                                                                                                |                           |             |
| <b>Subdomain I</b> |                                                                         |                                                                                                                                                                                                                           | <b>Management Of Speech and Hearing Problems, C14</b>                                                                               |                           |             |
| <b>SNo</b>         | <b>First Author</b>                                                     | <b>Title</b>                                                                                                                                                                                                              | <b>Year</b>                                                                                                                         | <b>Subdomain II</b>       | <b>Code</b> |
| 69                 | Yan Yi Lam<br><a href="#">CRD42019116016</a>                            | The Role Of Speech Therapy For Improving The Speech Of Children With Cleft Lip And/Or Cleft Palate: A Systematic Review And Meta-Analysis                                                                                 | 2019                                                                                                                                |                           |             |



**Annexure 7:** Table showing details of ongoing studies registered in PROSPERO and their categorization as domains and subdomains of cleft lip and palate. For subdomains (Subdomain I and Subdomain II) and the codes, refer to Table 1 and Figure 1.

|                             |                                                              |                                                                                                                                                                     |                                                   |                                                                            |             |
|-----------------------------|--------------------------------------------------------------|---------------------------------------------------------------------------------------------------------------------------------------------------------------------|---------------------------------------------------|----------------------------------------------------------------------------|-------------|
| 70                          | Gabriela Ribeiro Schilling<br><a href="#">CRD42021209088</a> | Therapies For Velopharyngeal Dysfunction In Children With Cleft Lip And Palate: Systematic Literature Review                                                        | 2021                                              |                                                                            |             |
| 71                          | Miriam Platte<br><a href="#">CRD42021244429</a>              | Phonological And Articulatory Speech Therapy Interventions For Children With Cleft Palate: A Systematic Review                                                      | 2021                                              |                                                                            |             |
| <b>Subdomain I</b>          |                                                              |                                                                                                                                                                     | <b>Outcome Assessment, C15</b>                    |                                                                            |             |
| <b>SNo</b>                  | <b>First Author</b>                                          | <b>Title</b>                                                                                                                                                        | <b>Year</b>                                       | <b>Subdomain II</b>                                                        | <b>Code</b> |
| 72                          | Philippa Drury<br><a href="#">CRD42020199893</a>             | A Systematic Review Of The Quality Of Photographic Rating Systems For The Assessment Of Aesthetic Outcome Following Cleft Lip Surgery                               | 2020                                              | Photography And Records                                                    | B7          |
| 73                          | Shreya S<br><a href="#">CRD42021261405</a>                   | Comparison Of Predicted Outcomes In Presurgical Cleft Patients With And Without Presurgical Nasoalveolar Moulding                                                   | 2021                                              | Presurgical Infant Orthopaedics And Naso-Alveolar Moulding                 | C3          |
| 74                          | Percy Rossell-Perry<br><a href="#">CRD42021240526</a>        | Does The Use Of Postoperative Nasal Conformers Improve Nasal Outcomes In Cleft Lip And Palate Patients?                                                             | 2021                                              | Presurgical Infant Orthopaedics And Naso-Alveolar Moulding                 | C3          |
| 75                          | Jianan Yan<br><a href="#">CRD42022290070</a>                 | Comparison Between Aesthetic Assessments Given By The Cleft Patients And The Professionals: A Systematic Review                                                     | 2022                                              | Psychosocial Aspects, Perceptions And Quality Of Life Of Patients With Clp | E2          |
| <b>Domain D: PROGNOSTIC</b> |                                                              |                                                                                                                                                                     |                                                   |                                                                            |             |
| <b>Subdomain I</b>          |                                                              |                                                                                                                                                                     | <b>Effects/Complications Of Untreated CLP, D1</b> |                                                                            |             |
| <b>SNo</b>                  | <b>First Author</b>                                          | <b>Title</b>                                                                                                                                                        | <b>Year</b>                                       | <b>Subdomain II</b>                                                        | <b>Code</b> |
| 76                          | Tarek Balam<br><a href="#">CRD42020148494</a>                | Effect Of The Cleft Lip And Palate On Maxillofacial Growth: A Systematic Review And Network Meta-Analysis                                                           | 2020                                              | Anatomical And Functional Characteristics                                  | A6          |
| <b>Subdomain I</b>          |                                                              |                                                                                                                                                                     | <b>Effects/Complications Of PSIO And PNAM, D2</b> |                                                                            |             |
| <b>SNo</b>                  | <b>First Author</b>                                          | <b>Title</b>                                                                                                                                                        | <b>Year</b>                                       | <b>Subdomain II</b>                                                        | <b>Code</b> |
| 77                          | Sávio Gontijo<br><a href="#">CRD42018107909</a>              | Nasal Tissues Changes In Individuals With Unilateral Cleft Lip Or Unilateral Cleft Lip And Palate Treated With Presurgical Orthopedic Therapy: A Systematic Review. | 2018                                              |                                                                            |             |
| 78                          | Rajesh Kumar<br><a href="#">CRD42020175292</a>               | Does Presurgical Infant Orthopedics Have Any Long-Term Effect On Maxillary Growth In Patients With Cleft Lip And Palate - A Systematic Review                       | 2020                                              |                                                                            |             |
| 79                          | Sanjeev Datana<br><a href="#">CRD42020195879</a>             | Long Term Outcome Of Presurgical Infant Orthopaedics In Patients With Cleft Lip And Palate—A Systematic Review                                                      | 2020                                              | Outcome Assessment                                                         | C15         |
| 80                          | Li Chunrong<br><a href="#">CRD42020142026</a>                | Long-Term Effects Of Presurgical Nasoalveolarmolding On Unilateral Complete Cleft Lip And Palate: Systematic Review And Meta-Analysis.                              | 2020                                              | Outcome Assessment                                                         | C15         |
| 81                          | Ard likitkulthanaporn<br><a href="#">CRD42021283847</a>      | Long-Term Therapeutic Effects Of Pre-Surgical Nasoalveolar Molding In Patients With Cleft Lip And Palate: A Systematic Review And Meta-Analysis.                    | 2021                                              | Outcome Assessment                                                         | C15         |

**Annexure 7:** Table showing details of ongoing studies registered in PROSPERO and their categorization as domains and subdomains of cleft lip and palate. For subdomains (Subdomain I and Subdomain II) and the codes, refer to Table 1 and Figure 1.

|                    |                                                                  |                                                                                                                                                                                                                                                              |                                                                                      |                                                                              |             |
|--------------------|------------------------------------------------------------------|--------------------------------------------------------------------------------------------------------------------------------------------------------------------------------------------------------------------------------------------------------------|--------------------------------------------------------------------------------------|------------------------------------------------------------------------------|-------------|
| 82                 | Abhijeet Tribhuvan<br><a href="#">CRD42021234572</a>             | Nasal Changes Seen After Presurgical Nasoalveolar Moulding In Unilateral Cleft Lip And Palate Patients: A Systematic Review                                                                                                                                  | 2021                                                                                 |                                                                              |             |
| 83                 | Maria Dolores Rocha-Eiroa<br><a href="#">CRD42022283494</a>      | Long-Term Effects Of Presurgical Pediatric Orthopedics On Maxillofacial Growth And Dental Arch Dimensions In Patients With Non-Syndromic Cleft Lip And/Or Palate.                                                                                            | 2022                                                                                 | Outcome Assessment                                                           | C15         |
| <b>Subdomain I</b> |                                                                  |                                                                                                                                                                                                                                                              | <b>Effects/Complications Of Orthodontic Treatment, D3</b>                            |                                                                              |             |
| <b>SNo</b>         | <b>First Author</b>                                              | <b>Title</b>                                                                                                                                                                                                                                                 | <b>Year</b>                                                                          | <b>Subdomain II</b>                                                          | <b>Code</b> |
| 84                 | Ana Paula Herkrath<br><a href="#">CRD42018085181</a>             | Effect Of Previous Orthodontic Treatment On The Prognosis Of Alveolar Bone Graft In Individuals With Cleft Lip And Palate: A Systematic Review                                                                                                               | 2018                                                                                 | Alveolar Bone Grafting And Graft Materials                                   | C10         |
| 85                 | Jessica Arieta<br><a href="#">CRD42020203417</a>                 | Dental And Skeletal Effects Of Non-Surgical Maxillary Expansion In Patients With Cleft Lip And Palate: A Systematic Review.                                                                                                                                  | 2020                                                                                 | Conventional Orthodontics                                                    | C6          |
| 86                 | Rodrigo Almeida Nunes Teixeira<br><a href="#">CRD42020206800</a> | Dentoskeletal Effects Of Rapid Maxillary Expansion In Cleft Patients: A Systematic Review.                                                                                                                                                                   | 2020                                                                                 | Conventional Orthodontics                                                    | C6          |
| 87                 | Renata Bastos<br><a href="#">CRD42021290378</a>                  | Influence Of The Orthodontic Retainers And Oral Rehabilitation On The Stability Of The Maxillary Dental Arch In Patients With Unilateral Cleft Lip And Palate: A Systematic Review                                                                           | 2020                                                                                 | Conventional Orthodontics                                                    | C6          |
| 88                 | Xinqi Huang<br><a href="#">CRD42021242177</a>                    | Effect Of Bone-Anchored Maxillary Protraction On Temporomandibular Joint In Patients With Unilateral Cleft Lip And Palate Compared To Tooth-Anchored Maxillary Protraction?                                                                                  | 2021                                                                                 | Conventional Orthodontics                                                    | C6          |
| <b>Subdomain I</b> |                                                                  |                                                                                                                                                                                                                                                              | <b>Effects/Complications Of Surgical Treatment And/Or Alveolar Bone Grafting, D4</b> |                                                                              |             |
| <b>SNo</b>         | <b>First Author</b>                                              | <b>Title</b>                                                                                                                                                                                                                                                 | <b>Year</b>                                                                          | <b>Subdomain II</b>                                                          | <b>Code</b> |
| 89                 | Lorena Fernandes Ciaccia<br><a href="#">CRD42018111851</a>       | Stability Of Le Fort I Osteotomy In Cleft Lip And Palate Patients: A Systematic Review                                                                                                                                                                       | 2018                                                                                 | Orthognathic And Osteogenic Distraction Surgical Orthodontics                | C11         |
| 90                 | Lurian Minatel<br><a href="#">CRD42018095714</a>                 | Impact Of Surgical Protocol For Repair Of Hard Palate On Craniofacial Growth In Patients With Cleft Lip And Palate: Systematic Review And Meta-Analysis                                                                                                      | 2018                                                                                 |                                                                              |             |
| 91                 | Pedro Henrique Da Hora Sales<br><a href="#">CRD42020195927</a>   | Complications In Orthognathic Surgery In Cleft Patients. A Systematic Review.                                                                                                                                                                                | 2020                                                                                 |                                                                              |             |
| 92                 | Sirius Dan Inaoka<br><a href="#">CRD42020154944</a>              | Does Using Prf Associated With Autogenous Bone Graft In Cleft Patient Improve The Volume And The Density Of The Grafted Bone? A Systematic Review And Meta-Analysis                                                                                          | 2020                                                                                 | Alveolar Bone Grafting And Graft Materials                                   | C10         |
| 93                 | Rathindra Nath Bera<br><a href="#">CRD42020223310</a>            | Effect Of Single Stage Versus Two Stage (Soft Palate Followed By Hard Palate Repair) Versus Staged Hard Palate Repair On Facial Growth, Speech, Otologic Function And Occlusion Relationship In Patients With Unilateral And Bilateral Cleft Lip And Palate. | 2020                                                                                 | Cleft Alveolus, Submucous Cleft And All Types Of Cleft Palate Closure/Repair | C9          |



**Annexure 7:** Table showing details of ongoing studies registered in PROSPERO and their categorization as domains and subdomains of cleft lip and palate. For subdomains (Subdomain I and Subdomain II) and the codes, refer to Table 1 and Figure 1.

|                                                                        |                                                                  |                                                                                                                                                 |                                                                                                                                                      |                                                                              |             |
|------------------------------------------------------------------------|------------------------------------------------------------------|-------------------------------------------------------------------------------------------------------------------------------------------------|------------------------------------------------------------------------------------------------------------------------------------------------------|------------------------------------------------------------------------------|-------------|
| 94                                                                     | Tarnjit Sangha<br><a href="#">CRD42020209080</a>                 | Network Meta-Analysis: Factors That Predict Success In Bone Grafting In Cleft Lip And Palate                                                    | 2020                                                                                                                                                 |                                                                              |             |
| 95                                                                     | Karina Freitas<br><a href="#">CRD42020205656</a>                 | Relapse After Non-Surgical Orthodontic Treatment In Patients With Unilateral Cleft Lip And Palate: A Systematic Review.                         | 2020                                                                                                                                                 | Outcome Assessment                                                           | C15         |
| 96                                                                     | Lingzhi xie<br><a href="#">CRD42021258202</a>                    | Effect Of Age At Premaxillary Osteotomy On Facial Growth In Bilateral Cleft Lip/Palate Patients: A Systematic Review                            | 2021                                                                                                                                                 | Anatomical And Functional Characteristics                                    | A4          |
| 97                                                                     | Joanna Janiszewska – Olszowska<br><a href="#">CRD42021268957</a> | Influence Of Palatal Surgery On Craniofacial Morphology In Patients With Cleft Palate Without Cleft Lip                                         | 2021                                                                                                                                                 |                                                                              |             |
| 98                                                                     | Alexander Schulze Wenning<br><a href="#">CRD42021289846</a>      | One-Stage Or Two-Stage Palatoplasty, Comparing Maxillofacial Growth And Speech Outcome In Patients With Uni- And Bilateral Cleft Lip And Palate | 2021                                                                                                                                                 | Cleft Alveolus, Submucous Cleft And All Types Of Cleft Palate Closure/Repair | C9          |
| 99                                                                     | Cui Cui<br><a href="#">CRD42021234921</a>                        | Survival Rate Of Dental Implant In Patients With Cleft Lip And Palate: A Systematic Review And Meta-Analysis                                    | 2021                                                                                                                                                 | Comprehensive Interdisciplinary Care                                         | C13         |
| <b>Subdomain I</b>                                                     |                                                                  |                                                                                                                                                 | <b>Obstructive Sleep Apnoea, D5</b>                                                                                                                  |                                                                              |             |
| <b>SNo</b>                                                             | <b>First Author</b>                                              | <b>Title</b>                                                                                                                                    | <b>Year</b>                                                                                                                                          | <b>Subdomain II</b>                                                          | <b>Code</b> |
| 100                                                                    | Milton Chin<br><a href="#">CRD42020165781</a>                    | Obstructive Sleep Apnea Following Velopharyngeal Surgery In Children With Non-Syndromic Repaired Cleft Palate: A Systematic Review              | 2020                                                                                                                                                 | Cleft Alveolus, Submucous Cleft And All Types Of Cleft Palate Closure/Repair | C9          |
| <b>Subdomain I</b>                                                     |                                                                  |                                                                                                                                                 | <b>Oral Health Aspects Including Dental Caries And Other Dental Problems, D6</b>                                                                     |                                                                              |             |
| <b>SNo</b>                                                             | <b>First Author</b>                                              | <b>Title</b>                                                                                                                                    | <b>Year</b>                                                                                                                                          | <b>Subdomain II</b>                                                          | <b>Code</b> |
| 101                                                                    | Vaibhav Sahni<br><a href="#">CRD42020210178</a>                  | Does The Presence Of Clefts Alter The Periodontal Status Of Patients?                                                                           | 2020                                                                                                                                                 |                                                                              |             |
| <b>Domain E: PSYCHOSOCIAL ASPECTS, PERCEPTIONS AND QUALITY OF LIFE</b> |                                                                  |                                                                                                                                                 |                                                                                                                                                      |                                                                              |             |
| <b>Subdomain I</b>                                                     |                                                                  |                                                                                                                                                 | <b>Psychosocial Aspects, Perceptions And Quality Of Life Of Family Members Of The Patients With Clp, Lay People And Healthcare Professionals, E1</b> |                                                                              |             |
| <b>SNo</b>                                                             | <b>First Author</b>                                              | <b>Title</b>                                                                                                                                    | <b>Year</b>                                                                                                                                          | <b>Subdomain II</b>                                                          | <b>Code</b> |
| 102                                                                    | Kan Man Carmen Li<br><a href="#">CRD42021291478</a>              | Barriers And Facilitators Of Breastfeeding Amongst Parents Of Infants With Cleft Lip And/Or Palate: A Mixed Methods Systematic Review           | 2021                                                                                                                                                 |                                                                              |             |
| 103                                                                    | Tatiane Cardoso<br><a href="#">CRD42021270421</a>                | Breastfeeding In Children With Cleft Lip And Palate: Breastfeeding Practices And Difficulties                                                   | 2021                                                                                                                                                 |                                                                              |             |

**Annexure 7:** Table showing details of ongoing studies registered in PROSPERO and their categorization as domains and subdomains of cleft lip and palate. For subdomains (Subdomain I and Subdomain II) and the codes, refer to Table 1 and Figure 1.

|                                   |                                                                 |                                                                                                                                                   |                                                                                       |                                                                                                                                           |             |
|-----------------------------------|-----------------------------------------------------------------|---------------------------------------------------------------------------------------------------------------------------------------------------|---------------------------------------------------------------------------------------|-------------------------------------------------------------------------------------------------------------------------------------------|-------------|
| 104                               | Craig Griffiths<br><a href="#">CRD42017072883</a>               | Caregiver-Infant Interactions And Attachment In Children With Orofacial Clefts: A Systematic Review Of The Literature                             | 2017                                                                                  |                                                                                                                                           |             |
| 105                               | Sukeshana Srivastav<br><a href="#">CRD42022306107</a>           | Global Status And Trends Of Knowledge, Attitude, Awareness And Practice For Management Of Cleft Lip And Palate Patients Among The Orthodontists   | 2022                                                                                  |                                                                                                                                           |             |
| <b>Subdomain I</b>                |                                                                 |                                                                                                                                                   | <b>Psychosocial Aspects, Perceptions And Quality Of Life Of Patients With CLP, E2</b> |                                                                                                                                           |             |
| <b>SNo</b>                        | <b>First Author</b>                                             | <b>Title</b>                                                                                                                                      | <b>Year</b>                                                                           | <b>Subdomain II</b>                                                                                                                       | <b>Code</b> |
| 106                               | Ashleigh Nocher<br><a href="#">CRD42012003097</a>               | What Is The Psycho-Social Impact Of Dental And Orthodontic Related Treatment In Patients With Cleft Lip And Palate?                               | 2012                                                                                  |                                                                                                                                           |             |
| 107                               | Brent Collett<br><a href="#">CRD42017079689</a>                 | Academic Outcomes For Children With Orofacial Clefts: A Systematic Review Of The Literature                                                       | 2017                                                                                  |                                                                                                                                           |             |
| 108                               | Dan Liu<br><a href="#">CRD42018095134</a>                       | The Effects Of Cleft Lip And/Or Palate On Patients' Self-Esteem And Psychological Interventions To Improve Their Self-Esteem: A Systematic Review | 2018                                                                                  |                                                                                                                                           |             |
| 109                               | Kinga Amalia Sandor-Bajusz                                      | The Presence Of Mental Disorders In Individuals With Isolated Cleft Lip And Palate                                                                | 2020                                                                                  |                                                                                                                                           |             |
| 110                               | Camila De Castro Corrêa<br><a href="#">CRD42021231494</a>       | Prevalence Of Social Stigma And Bullying In Individuals With Cleft Lip And Palate: Systematic Review                                              | 2021                                                                                  |                                                                                                                                           |             |
| <b>Subdomain I</b>                |                                                                 |                                                                                                                                                   | <b>Burden Of Care, E3</b>                                                             |                                                                                                                                           |             |
| <b>SNo</b>                        | <b>First Author</b>                                             | <b>Title</b>                                                                                                                                      | <b>Year</b>                                                                           | <b>Subdomain II</b>                                                                                                                       | <b>Code</b> |
| 111                               | Nuria Bengoechea De La Fuente<br><a href="#">CRD42022295182</a> | Unmet Needs And Burden In Caregivers Of Patients With Cleft Lip And Palate                                                                        | 2022                                                                                  | Psychosocial Aspects, Perceptions And Quality Of Life Of Family Members Of The Patients With CLP, Lay People And Healthcare Professionals | E1          |
| <b>Domain G: RESEARCH METHODS</b> |                                                                 |                                                                                                                                                   |                                                                                       |                                                                                                                                           |             |
| <b>Subdomain I</b>                |                                                                 |                                                                                                                                                   | <b>Clinical Practice Guidelines And Core Outcome Sets, G1</b>                         |                                                                                                                                           |             |
| <b>Sno</b>                        | <b>First Author</b>                                             | <b>Title</b>                                                                                                                                      | <b>Year</b>                                                                           | <b>Subdomain II</b>                                                                                                                       | <b>Code</b> |
| 112                               | Asha Chowdhar<br><a href="#">CRD42021224955</a>                 | Protocols Of Cleft Lip And Palate Treatment And Management Strategies: A Systematic Review.                                                       | 2021                                                                                  | Treatment Planning And Prediction                                                                                                         | C1          |
| 113                               | Peter Anto Johnson<br><a href="#">CRD42021258625</a>            | Clinical Guidelines For Cleft Lip And Palate Care: A Systematic Review                                                                            | 2021                                                                                  |                                                                                                                                           |             |
| 114                               | Mohammad Zeinalddin<br><a href="#">CRD42021280979</a>           | Protocols In Presurgical Infant Orthopedic Treatment – An Evidence Based Review                                                                   | 2021                                                                                  | Presurgical Infant Orthopaedics And Naso-Alveolar Moulding                                                                                | C3          |

**Annexure 7:** Table showing details of ongoing studies registered in PROSPERO and their categorization as domains and subdomains of cleft lip and palate. For subdomains (Subdomain I and Subdomain II) and the codes, refer to Table 1 and Figure 1.

| Domain H: RECENT ADVANCES |                                                               |                                                                                                                                                                         |                                                                      |              |      |
|---------------------------|---------------------------------------------------------------|-------------------------------------------------------------------------------------------------------------------------------------------------------------------------|----------------------------------------------------------------------|--------------|------|
| Subdomain I               |                                                               |                                                                                                                                                                         | Any Recent Research Area Not Covered In The Above Categorization, H1 |              |      |
| SNo                       | First Author                                                  | Title                                                                                                                                                                   | Year                                                                 | Subdomain II | Code |
| 115                       | Alexandre Borba<br><a href="#">CRD42017070818</a>             | The Use Of Platelet Concentrates (Platelet-Rich Plasma (PRP) And Platelet-Rich Fibrin (PRF)) For The Treatment Of Cleft Lip And/Or Palate Subjects: A Systematic Review | 2017                                                                 |              |      |
| 116                       | Diandra Sabrina Natsirkalla<br><a href="#">CRD42021259614</a> | Stem Cell-Based Tissue Engineering For Cleft Defects                                                                                                                    | 2021                                                                 |              |      |
| 117                       | Mohame d Zahoor Ulhuqh<br><a href="#">CRD42021270601</a>      | The Clinical Applications Of Artificial Intelligence And Machine Learning In Children With Cleft Lip And Palate. A Systematic Review And Meta-Analysis                  | 2021                                                                 |              |      |
