# Supplementary material for: Evidence Mapping and Quality Analysis of Systematic Reviews on Various Aspects Related to Cleft Lip and Palate
Source: J Clin Med. 2023 Sep 16;12(18):6002. doi: 10.3390/jcm12186002 (PMC10532364; doi:10.3390/jcm12186002)
Supplement: Supplementary file 1 [file jcm-12-06002-s001.zip]

Archive with 7 entries (7 files):
- Annexure 1.jpg
- Annexure 2.pdf
- Annexure 3.pdf
- Annexure 4.pdf
- Annexure 5.pdf
- Annexure 6.jpg
- Annexure 7.pdf
